# Supplementary material for: Kinetics and mechanism for OH-initiated gas-phase chemistry of α-terpineol
Source: Royal Society of Chemistry journal article supplement (doi:10.1039/c5ra14781f), 2015-01-01
Supplement: c5ra14781f1.pdf [file c5ra14781f1.pdf]

## Supplementary material

### Kinetics and mechanism for OH-initiated gas-phase chemistry of $\alpha$ -terpineol

Yan Zhao<sup>a</sup>, Haitao Sun<sup>b</sup>, Mei Qin<sup>b</sup>, Renjun Wang<sup>a</sup>, Laixiang Xu<sup>\*,a</sup>

**Keywords:**  $\alpha$ -Terpineol; OH radicals; Reaction mechanism; Oxidation products;  
Kinetic parameters

---

<sup>a</sup> School of Life Sciences, Qufu Normal University, Qufu, 273165, P. R. China

<sup>b</sup> School of Chemistry and Chemical Engineering, Qufu Normal University,  
Qufu, 273165, P. R. China

\*Corresponding author. E-mail: [xlx150723@163.com](mailto:xlx150723@163.com)

Fax: 86-537-4456887

## Computational methods

### The reliability of tunneling corrections in RRKM method

**Scheme S** The structure of  $\alpha$ -terpineol.

**Fig. S1** The primary reaction pathways of  $\alpha$ -terpineol with OH radical embedded with the potential barriers  $\Delta E$  (kcal mol<sup>-1</sup>) and reaction heats  $\Delta H$  (kcal mol<sup>-1</sup>) at the BB1K/6-31+G(d,p)// BB1K/6-311+G(3df,2p) level.

**Fig. S2** MPWB1K/6-31+G(d,p) optimized geometries with the bond lengths (Å) for the transition states involved in the reaction of OH with  $\alpha$ -terpineol.

**Fig. S3** MPWB1K/6-31+G(d,p) optimized geometries with the bond lengths (Å) for the intermediate states and products involved in the reaction of OH with  $\alpha$ -terpineol.

**Fig. S4** Potential energy surfaces of self-decomposition of IM2.

**Table S1** The rate constants ( $k$ ) at 298 K after considering the errors

**Table S2** The rate constants (cm<sup>3</sup> molecule<sup>-1</sup> s<sup>-1</sup>) of the title reactions for the gas-phase oxidation of  $\alpha$ -terpineol with OH radicals at 298 K and 1 atm

**Table S3** Arrhenius formulas of rate constants (cm<sup>3</sup> molecule<sup>-1</sup> s<sup>-1</sup>) for the H-abstraction reactions at 180-380 K

**Table S4** Cartesian coordinates for the optimized stationary points

## Computational methods

It is generally recognized that MPWB1K and BB1K methods give good results for barrier height calculations thermochemistry and thermochemical kinetics.<sup>1,2</sup> In addition, these energy barriers involved in the title reactions are calculated to be about 1-5 kcal/mol at the MPWB1K/6-31+G(d,p) level. Therefore, the geometric parameters of the stationary points are optimized at the BB1K/6-31+G(d,p) level. The potential barriers  $\Delta E$  (kcal mol<sup>-1</sup>) and reaction heats  $\Delta H$  (kcal mol<sup>-1</sup>) are presented in **Fig. S1**. In addition, the rate constants of the initial steps are calculated at 298 K and 1 atm and are listed in **Table S2**. The computational results indicate that the total rate constant based on the MPWB1K method matches well with the experimental value whereas that based on the BB1K method are nearly over 1 order of magnitude lower than that

of the literature. Obviously, the MPWB1K method is suitable for thermochemistry and thermochemical kinetics of this work.

- 1 Y. Zhao and D. G. Truhlar, *J. Phys. Chem. A*, 2004, **108**, 6908-6918.
- 2 Y. Zhao, B. J. Lynch and D. G. Truhlar, *J. Phys. Chem. A*, 2004, **108**, 2715-2719.

### The reliability of the tunneling corrections in RRKM method

The CVT with SCT correction is a reliable method to calculate the rate constants including tunneling effect. In order to verify the reliability of the tunneling corrections in the RRKM method, the rate constants of the initial H-abstraction steps are also calculated employing the CVT/SCT method over a suitable range of 180-380 K. The computed data are fitted in the Arrhenius formula  $k=A \exp(-E_a/RT)$ . **Table S3** lists the reaction rates at 298 K and the corresponding Arrhenius equation. Comparison shows that the rates in **Table 1** and **Table S3** have the good consistence. Therefore, the RRKM method for tunneling correction in this work is effective.

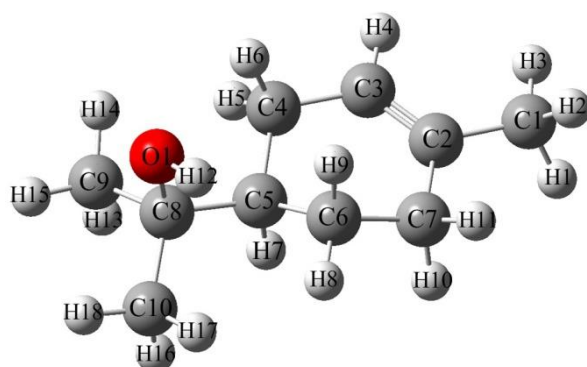

**Scheme S** The structure of  $\alpha$ -terpineol.

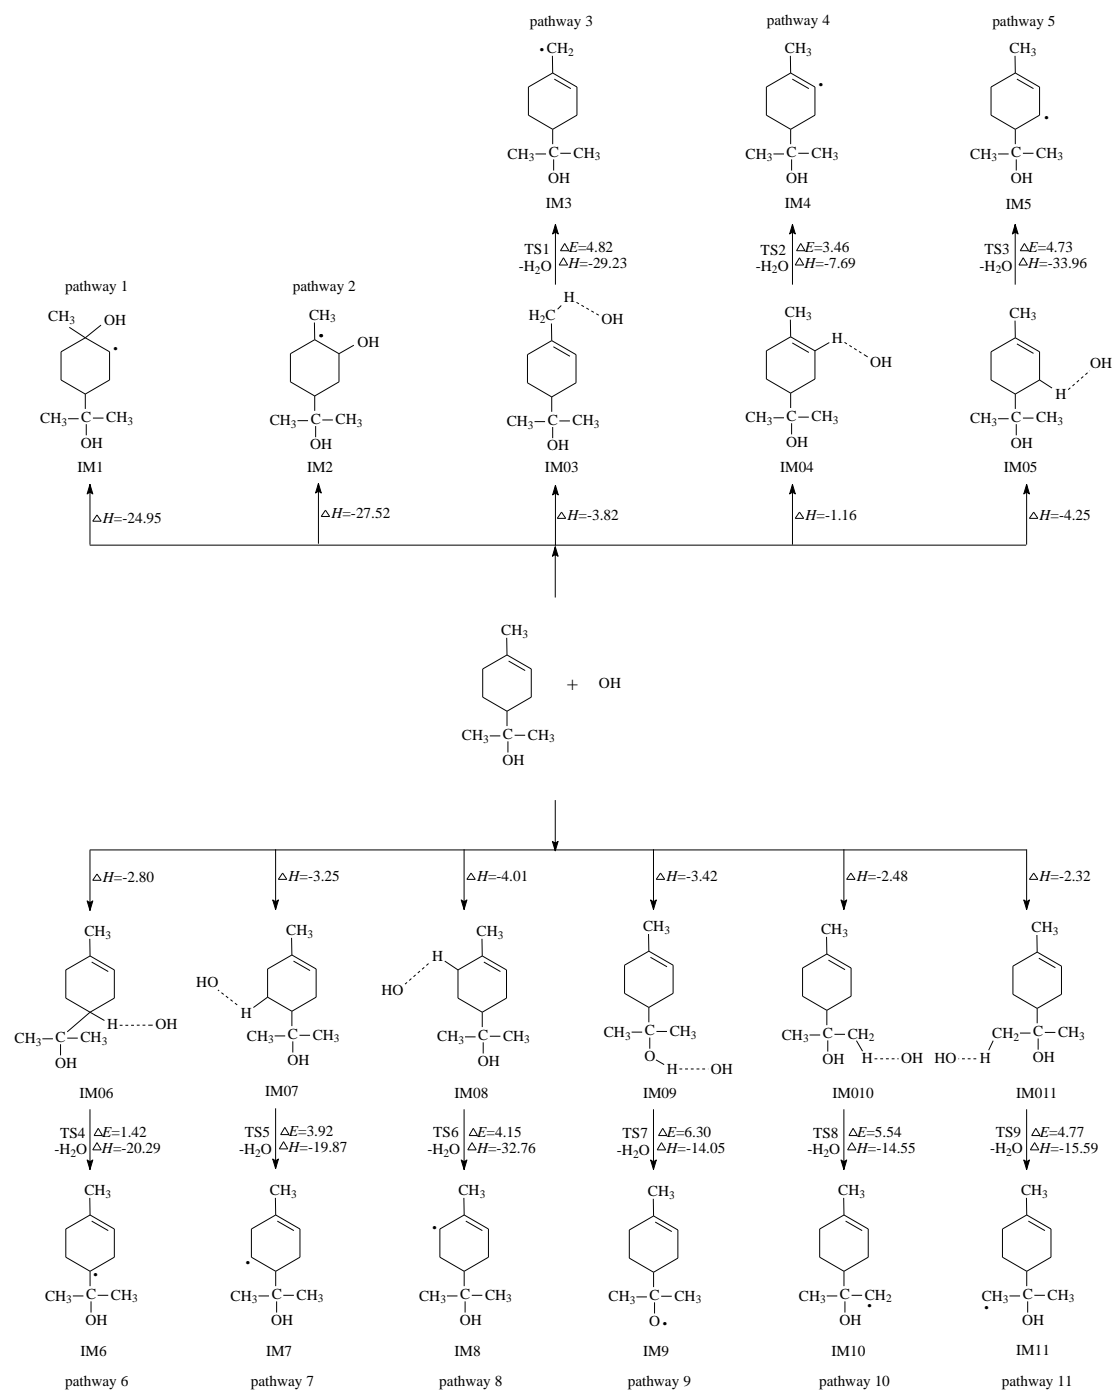

**Fig. S1** The primary reaction pathways of  $\alpha$ -terpineol with OH radical embedded with the potential barriers  $\Delta E$  (kcal mol<sup>-1</sup>) and reaction heats  $\Delta H$  (kcal mol<sup>-1</sup>) at the BB1K/6-31+G(d,p)//BB1K/6-311+G(3df,2p) level.

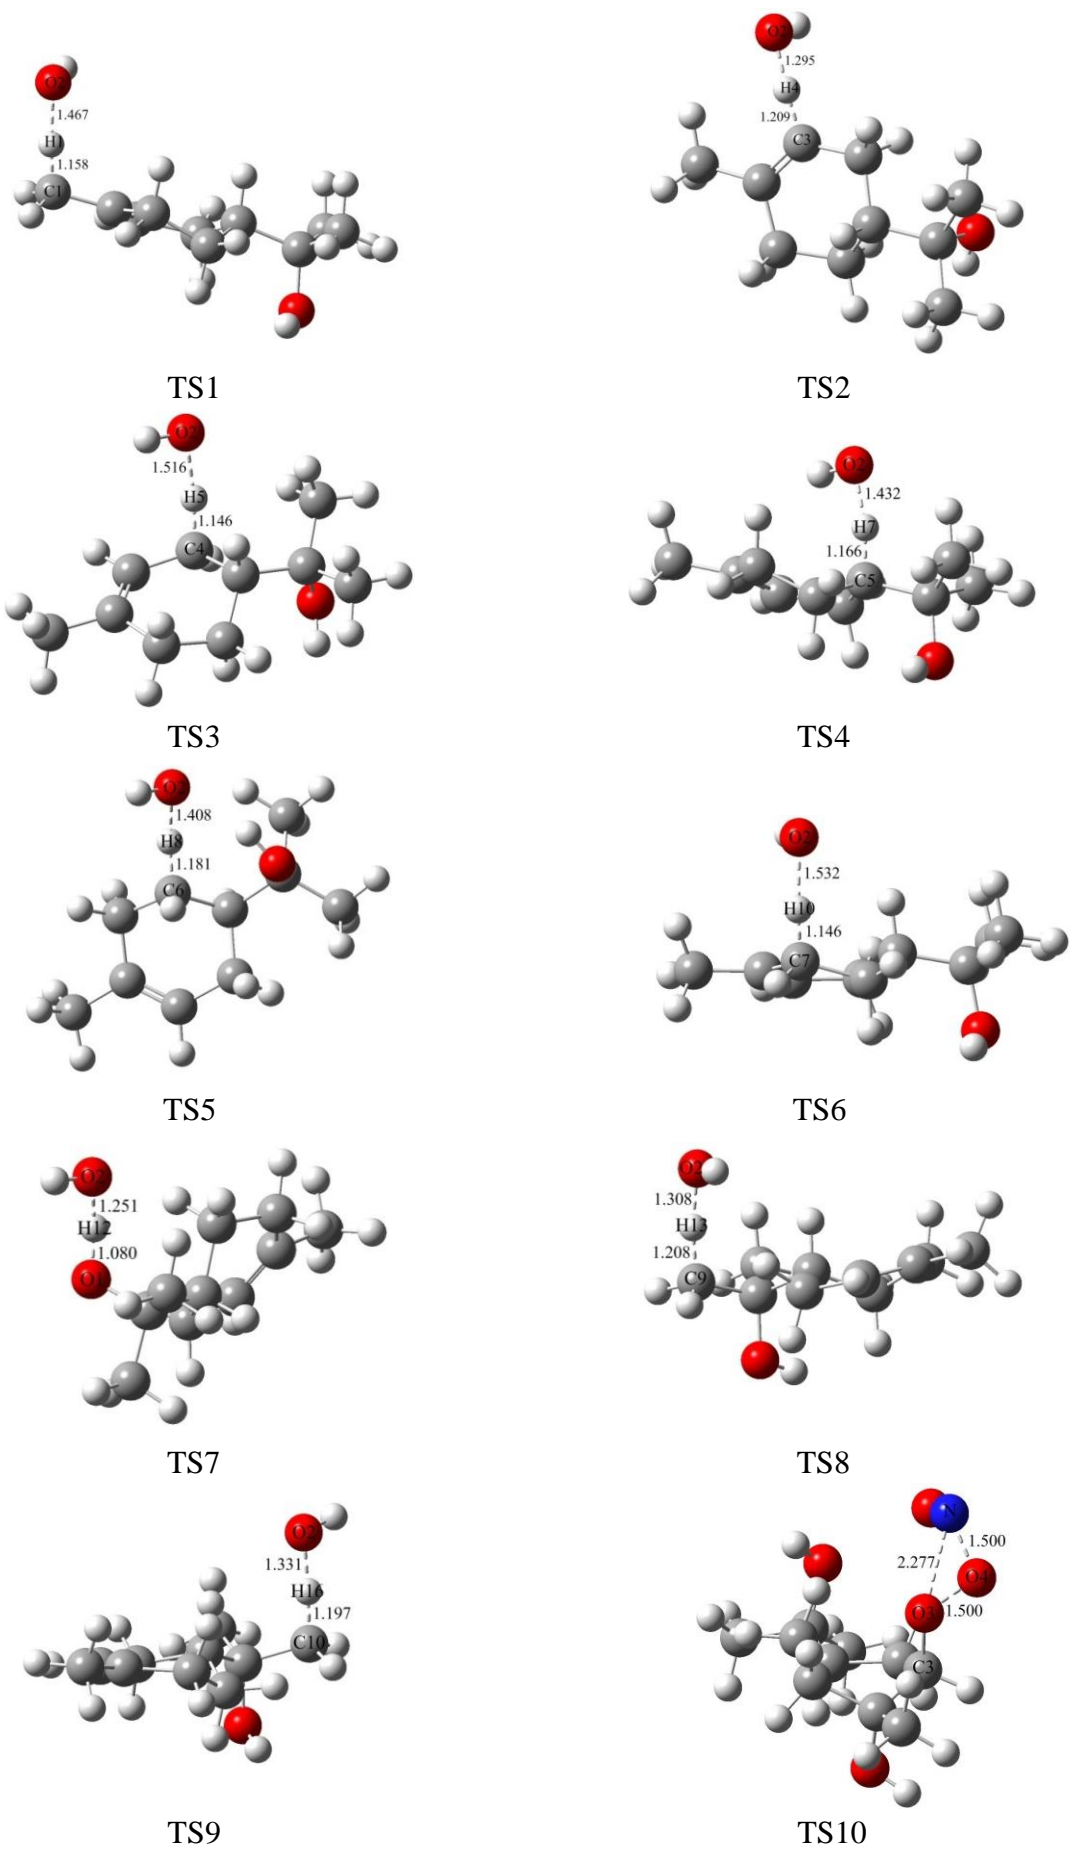

**Fig. S2** MPWB1K/6-31+G(d,p) optimized geometries with the bond lengths (Å) for the transition states involved in the reaction of  $\alpha$ -terpineol with OH radical.

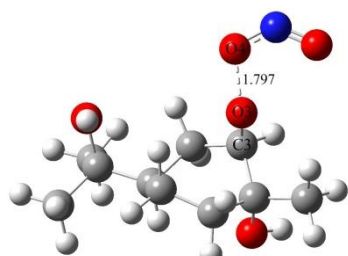

TS11

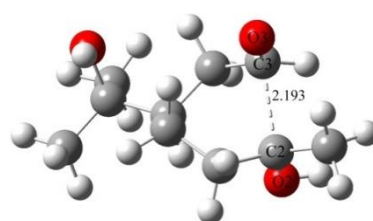

TS12

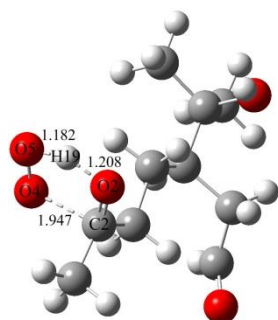

TS13

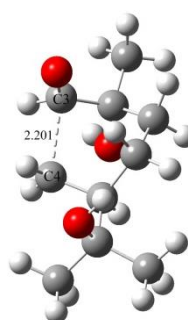

TS14

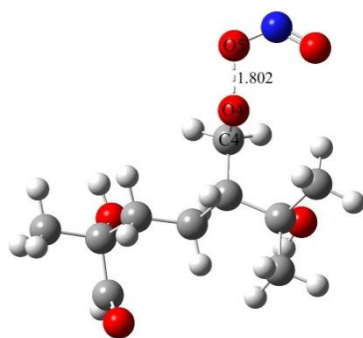

TS15

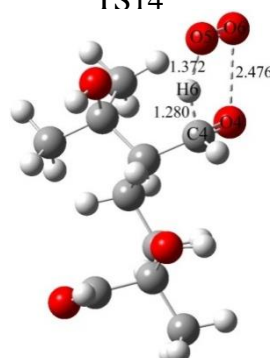

TS16

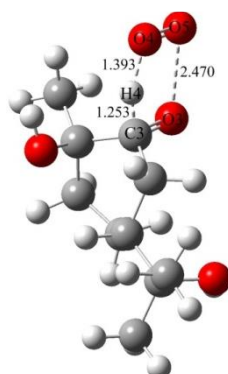

TS17

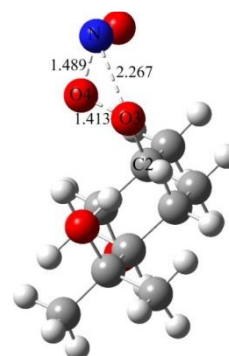

TS18

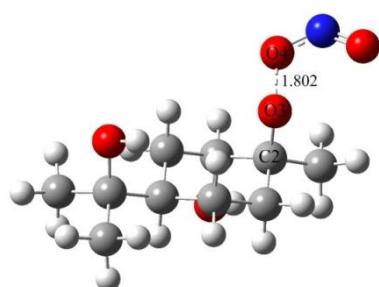

TS19

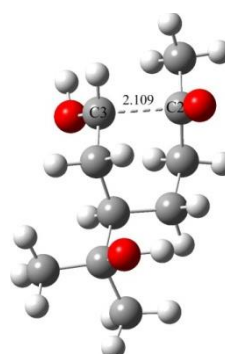

TS20

Fig. S2 (continued)

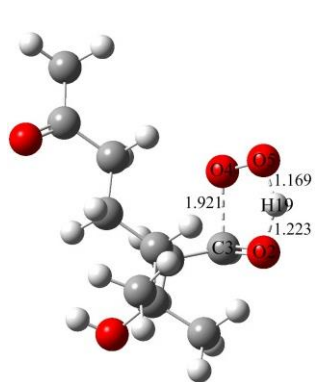

TS21

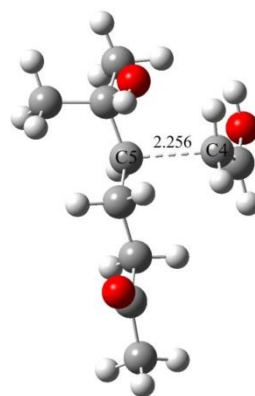

TS22

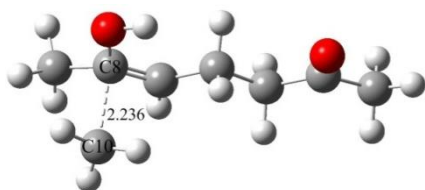

TS23

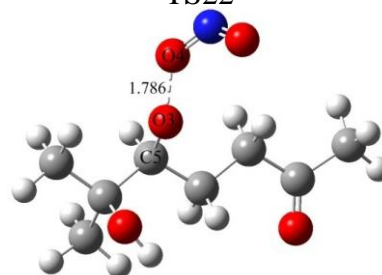

TS24

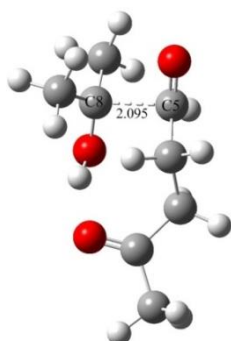

TS25

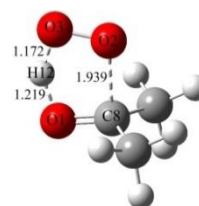

TS26

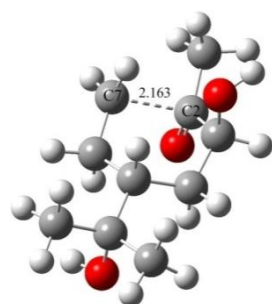

TS27

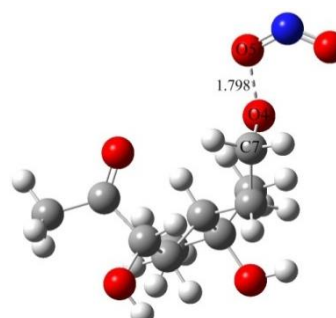

TS28

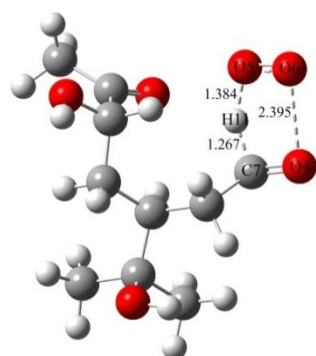

TS29

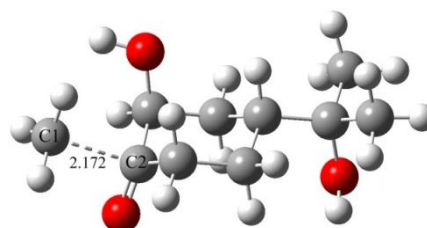

TS30

Fig. S2 (continued)

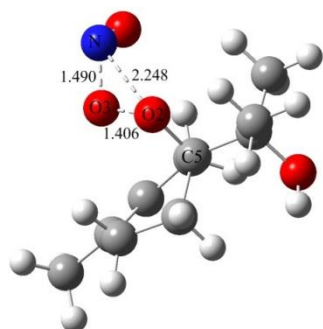

TS31

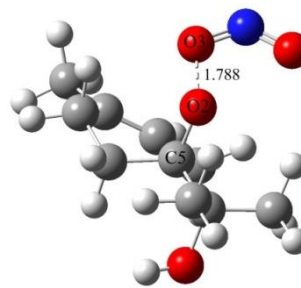

TS32

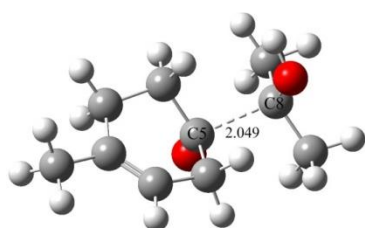

TS33

**Fig. S2 (continued)**

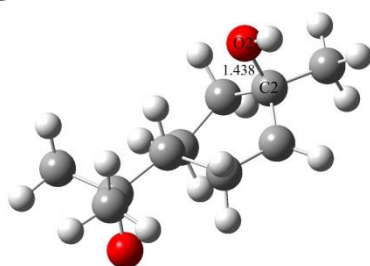

IM1

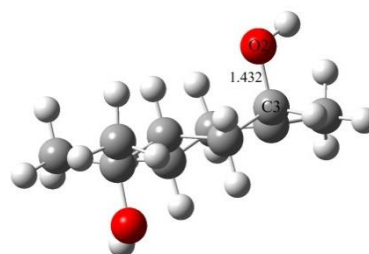

IM2

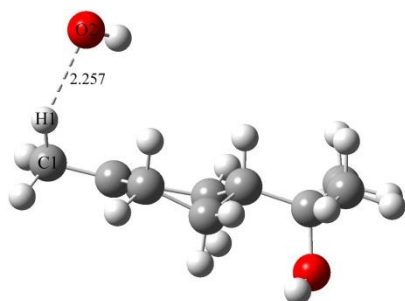

IM03

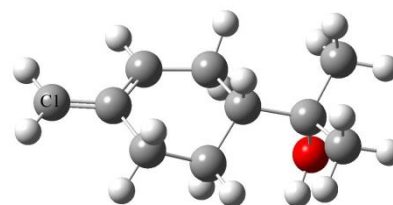

IM3

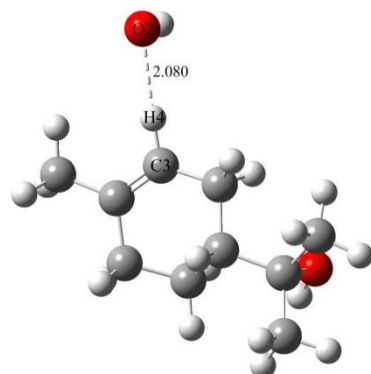

IM04

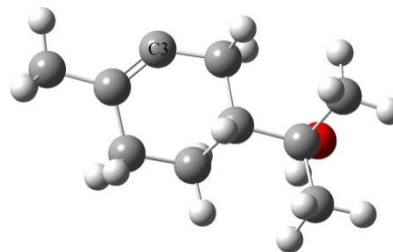

IM4

**Fig. S3** MPWB1K/6-31+G(d,p) optimized geometries with the bond lengths (Å) for the intermediate states and products involved in the reaction of  $\alpha$ -terpineol with OH radical.



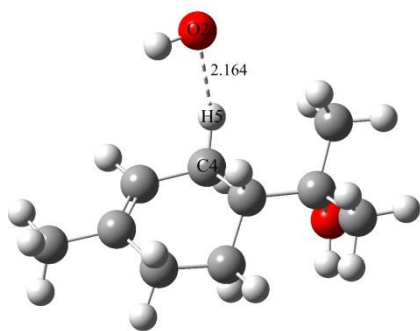

IM05

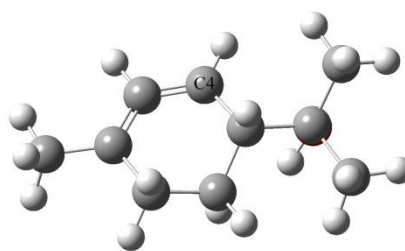

IM5

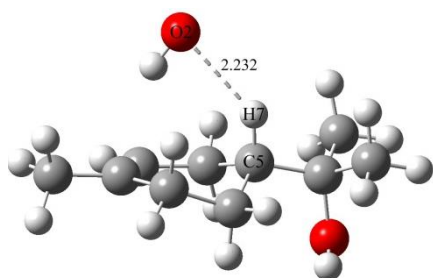

IM06

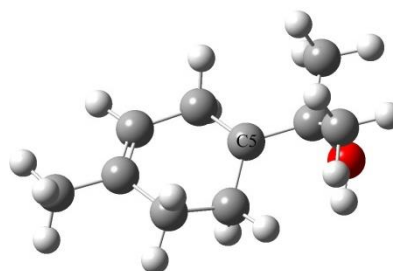

IM6

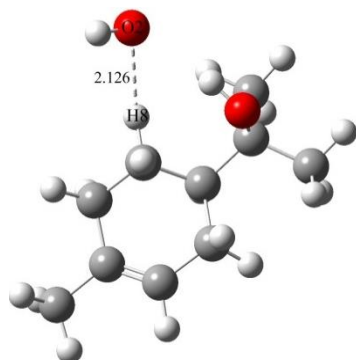

IM07

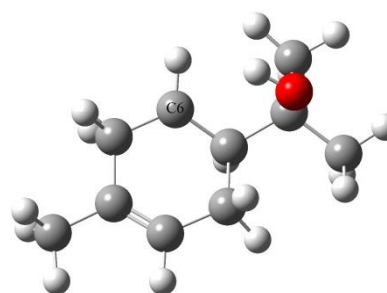

IM7

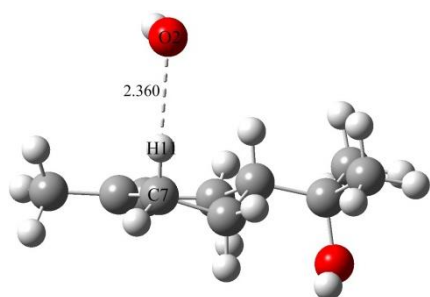

IM08

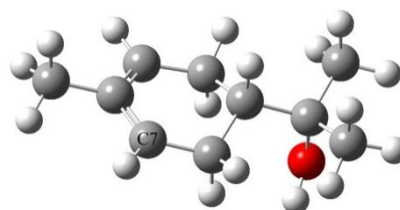

IM8

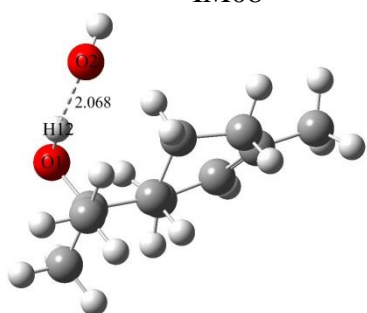

IM09

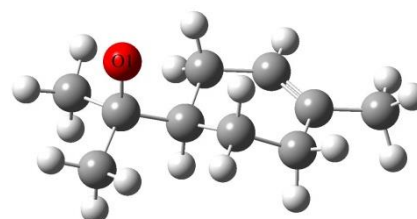

IM9

Fig. S3 (continued)

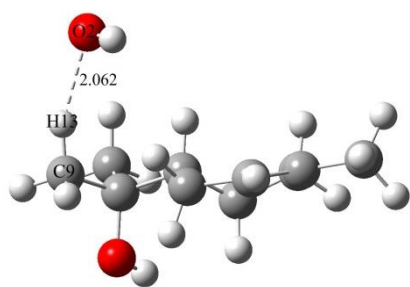

IM010

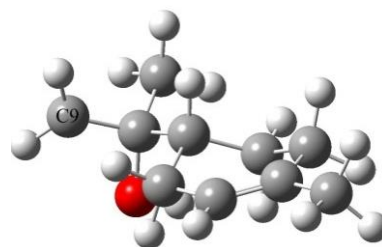

IM10

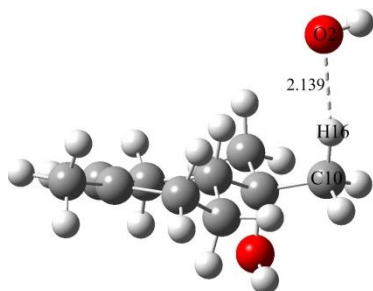

IM011

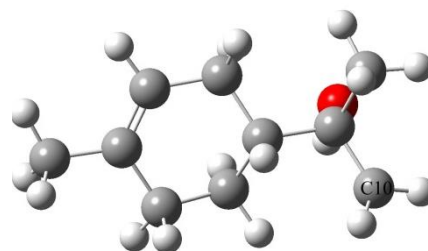

IM11

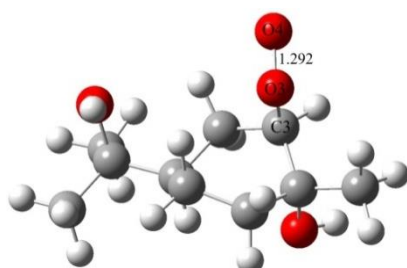

IM12

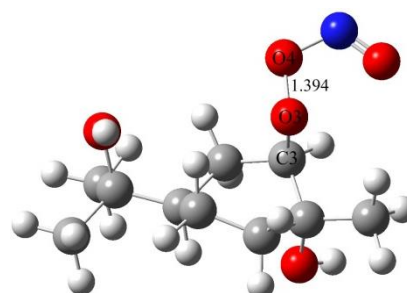

IM13

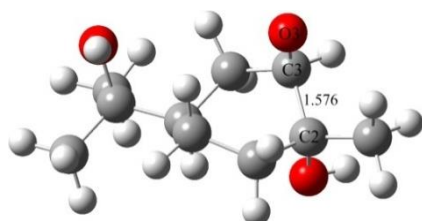

IM14

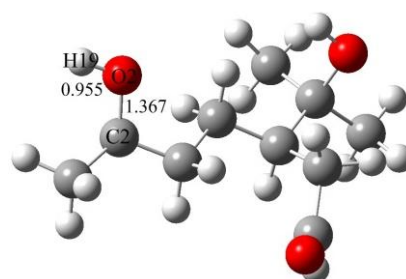

IM15

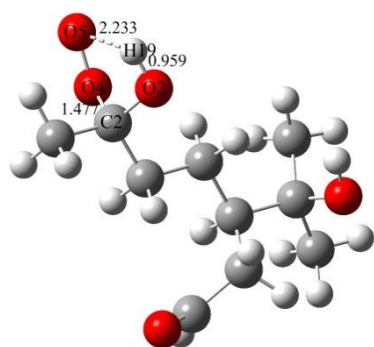

IM16

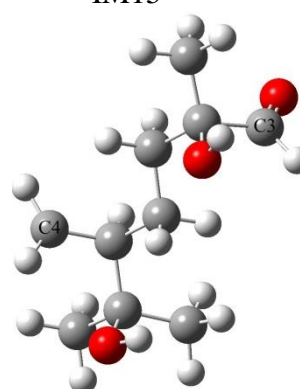

IM17

**Fig. S3 (continued)**

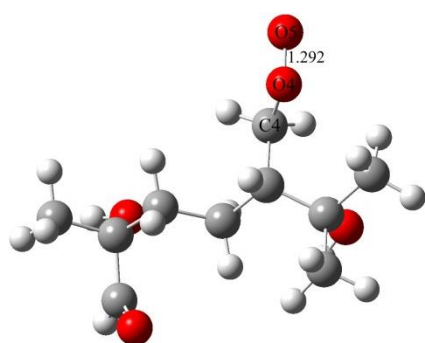

IM18

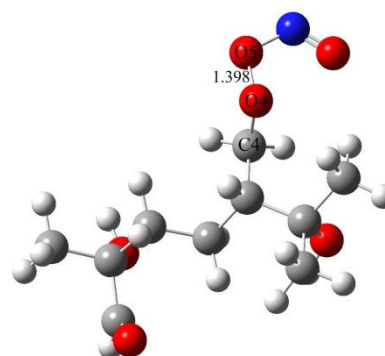

IM19

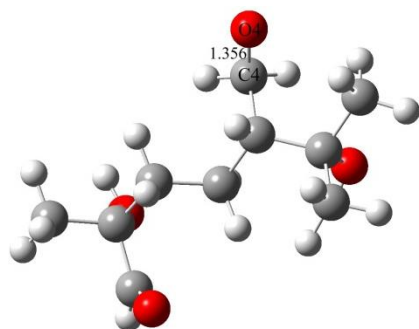

IM20

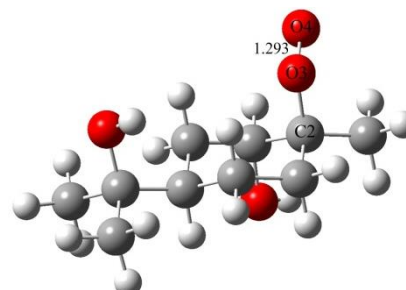

IM21

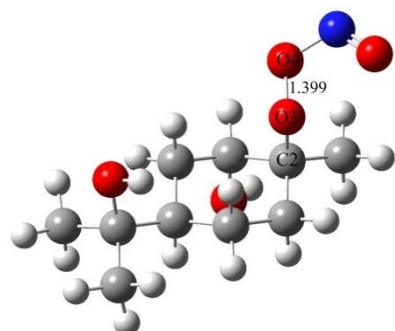

IM22

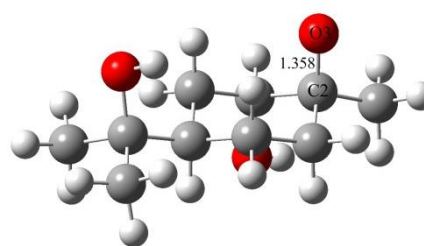

IM23

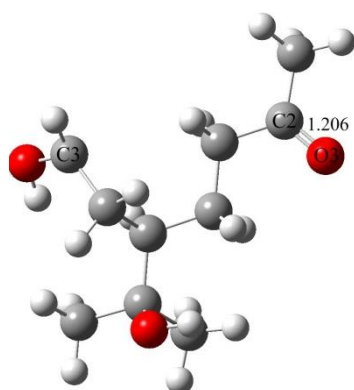

IM24

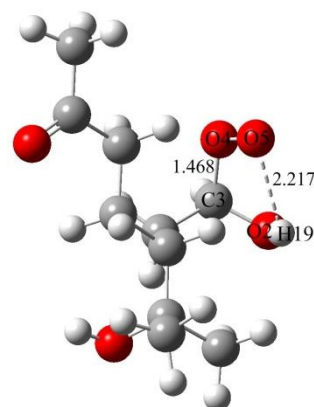

IM25

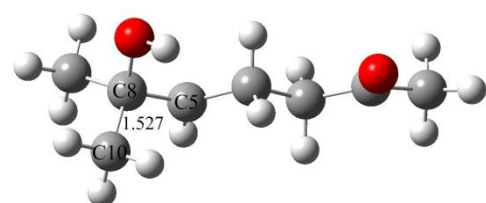

IM26

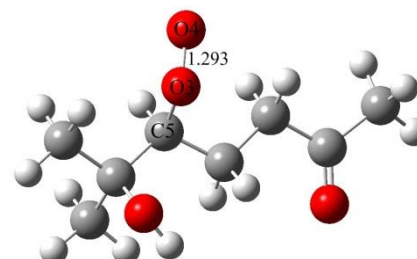

IM27

Fig. S3 (continued)

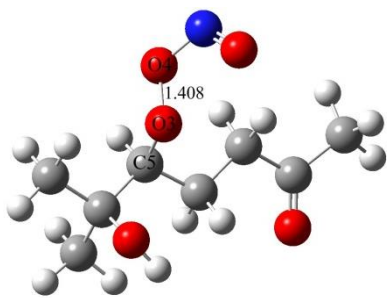

IM28

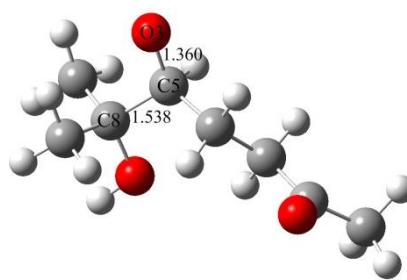

IM29

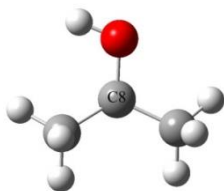

IM30

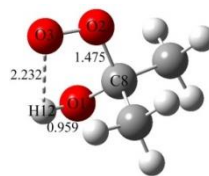

IM31

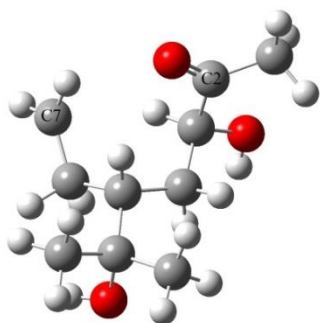

IM32

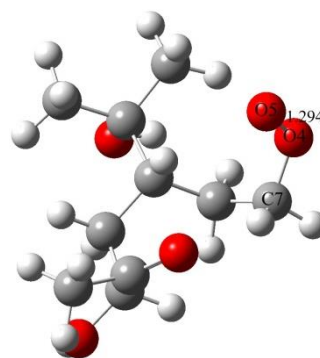

IM33

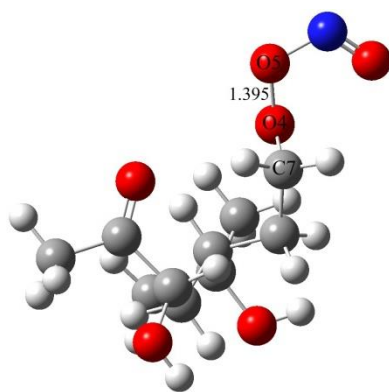

IM34

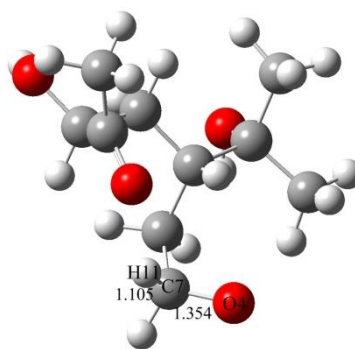

IM35

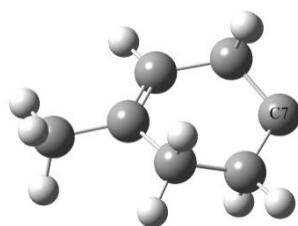

IM36

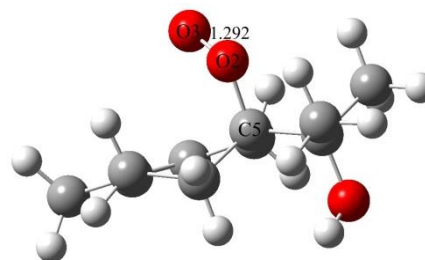

IM37

Fig. S3 (continued)

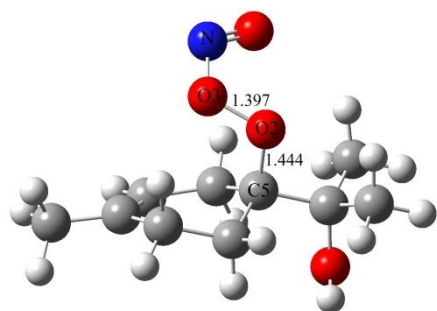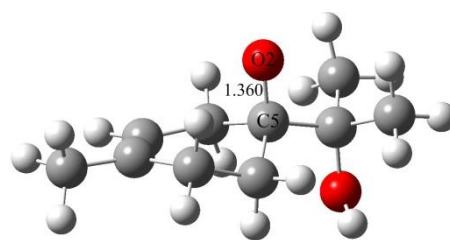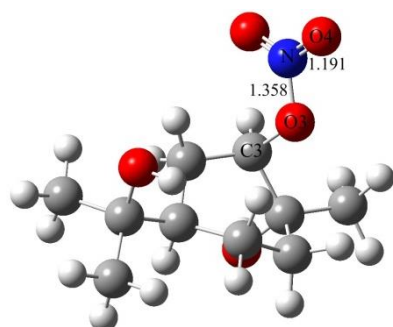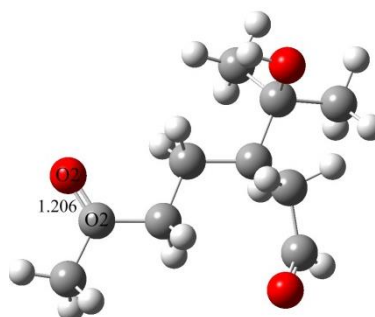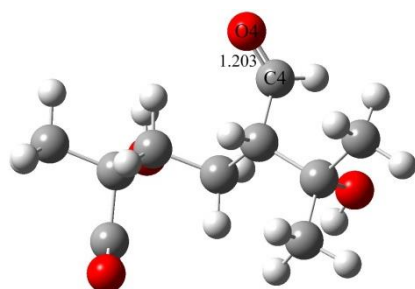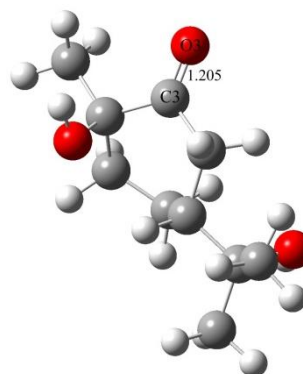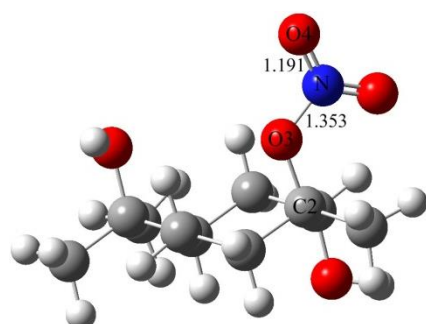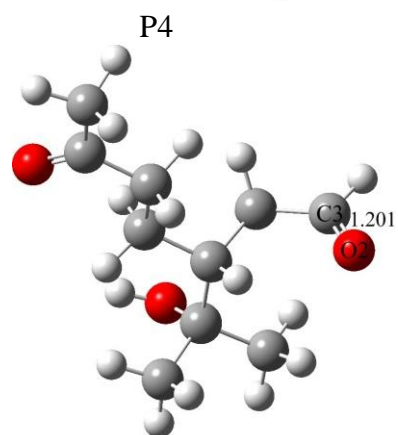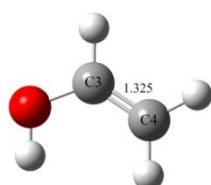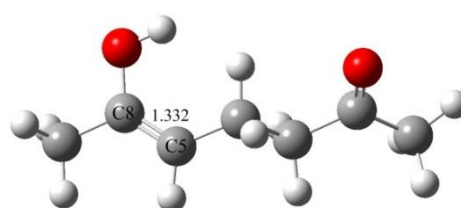

Fig. S3 (continued)

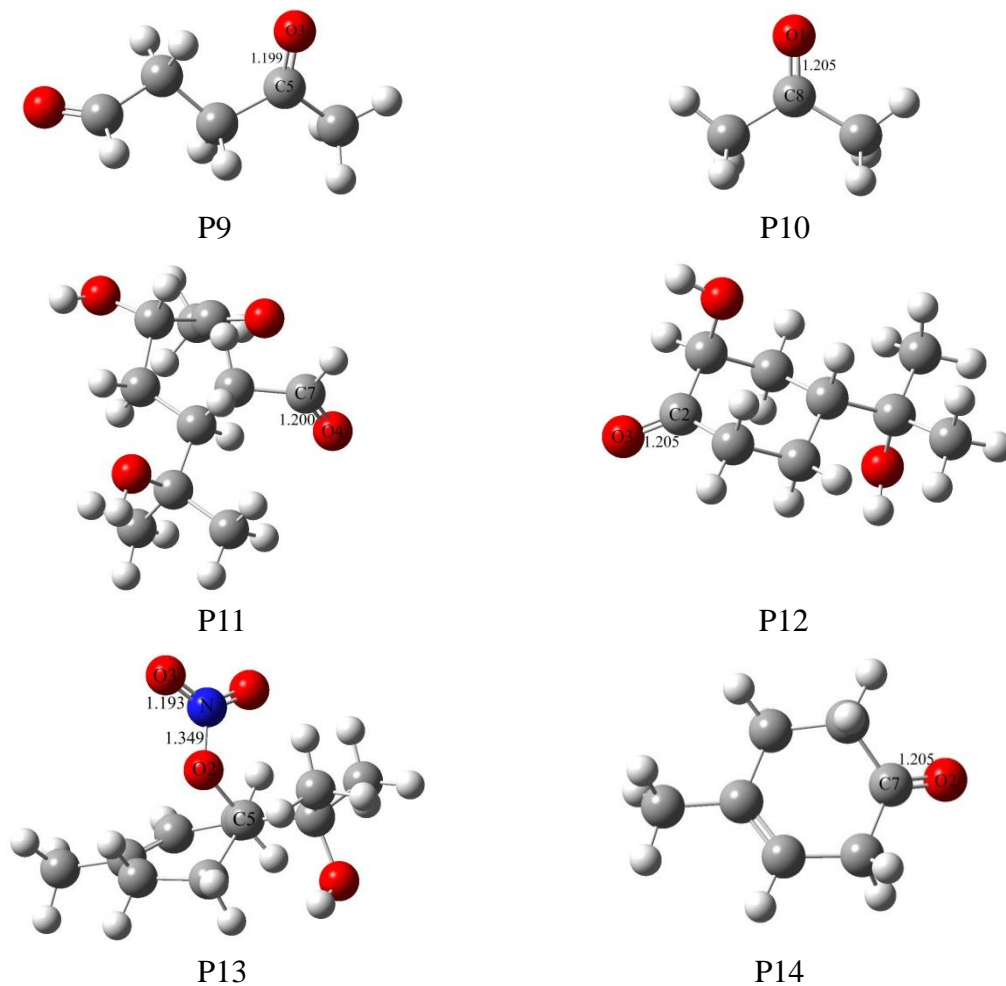

**Fig. S3 (continued)**

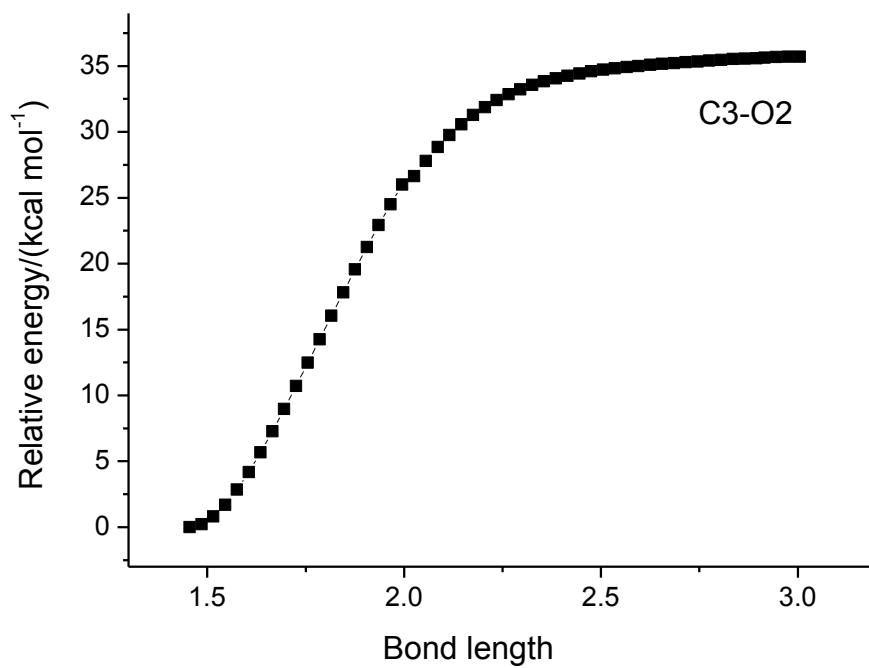

**Fig. S4** Potential energy surfaces of self-decomposition of IM2.

**Table S1** The rate constants ( $k$ ) at 298 K after considering the errors

| Reactions                               | Rate constants                             | Reactions                                | Rate constants                          |
|-----------------------------------------|--------------------------------------------|------------------------------------------|-----------------------------------------|
| R+OH→IM1                                | $5.95^{+0.35}_{-0.31} \times 10^{-11}$     | IM21+NO→IM22                             | $4.36^{+0.88}_{-0.31} \times 10^{-12}$  |
| R+OH→IM2                                | $6.37^{+2.35}_{-0.66} \times 10^{-11}$     | IM22→P5                                  | $4.78^{+21.26}_{-3.89} \times 10$       |
| R+OH→IM3+H <sub>2</sub> O               | $2.10^{+5.74}_{-1.64} \times 10^{-13}$     | IM22→IM23+NO <sub>2</sub>                | $5.17^{+20.13}_{-4.17} \times 10^4$     |
| R+OH→IM4+H <sub>2</sub> O               | $1.31^{+31.06}_{-1.08} \times 10^{-14}$    | IM23→IM24                                | $2.66^{+0.37}_{-1.19} \times 10^7$      |
| R+OH→IM5+H <sub>2</sub> O               | $7.04^{+0.63}_{-3.43} \times 10^{-13}$     | IM24+O <sub>2</sub> →IM25                | $5.40^{+0.09}_{-0.23} \times 10^{-12}$  |
| R+OH→IM6+H <sub>2</sub> O               | $3.64^{+58.57}_{-2.81} \times 10^{-12}$    | IM25→P6+HO <sub>2</sub>                  | $1.41^{+5.84}_{-1.15} \times 10^4$      |
| R+OH→IM7+H <sub>2</sub> O               | $1.96^{+14.33}_{-1.28} \times 10^{-14}$    | IM24→IM26                                | $2.85^{+10.75}_{-1.99} \times 10^{-8}$  |
| R+OH→IM8+H <sub>2</sub> O               | $7.19^{+55.41}_{-3.57} \times 10^{-13}$    | IM26→P8+CH <sub>3</sub>                  | $4.52^{+19.98}_{-3.72} \times 10^{-10}$ |
| R+OH→IM9+H <sub>2</sub> O               | $1.73^{+36.43}_{-0.71} \times 10^{-15}$    | IM26+O <sub>2</sub> →IM27                | $5.90^{+1.73}_{-1.20} \times 10^{-12}$  |
| R+OH→IM10+H <sub>2</sub> O              | $1.27^{+8.11}_{-1.50} \times 10^{-15}$     | IM27+NO→IM28                             | $6.21^{+0.77}_{-0.49} \times 10^{-12}$  |
| R+OH→IM11+H <sub>2</sub> O              | $1.37^{+6.82}_{-1.26} \times 10^{-13}$     | IM28→IM29+NO <sub>2</sub>                | $2.96^{+5.33}_{-2.01} \times 10^7$      |
| R+OH                                    | $(k)1.29^{+19.98}_{-0.66} \times 10^{-10}$ | IM29→IM30+P9                             | $2.43^{+11.28}_{-0.98} \times 10^9$     |
| IM1+O <sub>2</sub> →IM12                | $5.78^{+1.20}_{-0.36} \times 10^{-12}$     | IM30+O <sub>2</sub> →IM31                | $6.01^{+1.72}_{-1.07} \times 10^{-12}$  |
| IM12+NO→IM13                            | $7.11^{+0.28}_{-0.44} \times 10^{-12}$     | IM31→P10+HO <sub>2</sub>                 | $2.31^{+8.49}_{-1.84} \times 10^3$      |
| IM13→P1                                 | $1.06^{+4.65}_{-0.87}$                     | IM23→IM32                                | $4.32^{+7.09}_{-1.31} \times 10$        |
| IM13→IM14+NO <sub>2</sub>               | $2.22^{+9.54}_{-1.81} \times 10^3$         | IM32+O <sub>2</sub> →IM33                | $5.35^{+7.80}_{-2.12} \times 10^{-12}$  |
| IM14→IM15                               | $3.46^{+7.74}_{-2.54} \times 10^6$         | IM33+NO→IM34                             | $6.45^{+0.65}_{-0.47} \times 10^{-12}$  |
| IM15+O <sub>2</sub> →IM16               | $5.43^{+1.46}_{-0.76} \times 10^{-12}$     | IM34→IM35+NO <sub>2</sub>                | $0.12^{+0.61}_{-0.10}$                  |
| IM16→P2+HO <sub>2</sub>                 | $9.80^{+42.17}_{-7.96} \times 10^3$        | IM35+O <sub>2</sub> →P11+HO <sub>2</sub> | $5.71^{+48.82}_{-3.24} \times 10^{-53}$ |
| IM14→IM17                               | $1.52^{+5.56}_{-1.22} \times 10^3$         | IM23→P12+CH <sub>3</sub>                 | $1.09^{+8.03}_{-0.88} \times 10^{-2}$   |
| IM17+O <sub>2</sub> →IM18               | $5.28^{+1.08}_{-0.82} \times 10^{-12}$     | IM6+O <sub>2</sub> →IM37                 | $5.96^{+3.42}_{-0.78} \times 10^{-12}$  |
| IM18+NO→IM19                            | $5.83^{+0.32}_{-0.37} \times 10^{-12}$     | IM37+NO→IM38                             | $6.10^{+0.65}_{-0.43} \times 10^{-12}$  |
| IM19→IM20+NO <sub>2</sub>               | $0.10^{+0.45}_{-0.08}$                     | IM38→P13                                 | $1.08^{+5.74}_{-0.87}$                  |
| IM20+O <sub>2</sub> →P3+HO <sub>2</sub> | $7.20^{+58.91}_{-0.96} \times 10^{-53}$    | IM38→IM39+NO <sub>2</sub>                | $7.18^{+28.22}_{-5.81} \times 10^4$     |
| IM14+O <sub>2</sub> →P4+HO <sub>2</sub> | $4.50^{+10.80}_{-3.66} \times 10^{-27}$    | IM39→IM30+P14                            | $1.68^{+2.58}_{-1.02} \times 10^8$      |
| IM2+O <sub>2</sub> →IM21                | $5.78^{+1.44}_{-0.79} \times 10^{-12}$     |                                          |                                         |

Note: Units are s<sup>-1</sup> and cm<sup>3</sup> molecule<sup>-1</sup> s<sup>-1</sup> for unimolecular and bimolecular reactions, respectively.

**Table S2** The rate constants ( $\text{cm}^3 \text{ molecule}^{-1} \text{ s}^{-1}$ ) of the title reactions for the gas-phase oxidation of  $\alpha$ -terpineol with OH radicals at 298 K and 1 atm

| Reactions                  | Rate constants/MPWB1K     | Rate constants/BB1K       |
|----------------------------|---------------------------|---------------------------|
| R+OH→IM1                   | $5.95 \times 10^{-11}$    | $6.10 \times 10^{-12}$    |
| R+OH→IM2                   | $6.37 \times 10^{-11}$    | $5.24 \times 10^{-12}$    |
| R+OH→IM3+H <sub>2</sub> O  | $2.10 \times 10^{-13}$    | $2.01 \times 10^{-13}$    |
| R+OH→IM4+H <sub>2</sub> O  | $1.31 \times 10^{-14}$    | $6.99 \times 10^{-14}$    |
| R+OH→IM5+H <sub>2</sub> O  | $7.04 \times 10^{-13}$    | $3.83 \times 10^{-13}$    |
| R+OH→IM6+H <sub>2</sub> O  | $3.64 \times 10^{-12}$    | $6.53 \times 10^{-13}$    |
| R+OH→IM7+H <sub>2</sub> O  | $1.96 \times 10^{-14}$    | $1.59 \times 10^{-14}$    |
| R+OH→IM8+H <sub>2</sub> O  | $7.19 \times 10^{-13}$    | $3.99 \times 10^{-13}$    |
| R+OH→IM9+H <sub>2</sub> O  | $1.73 \times 10^{-15}$    | $8.27 \times 10^{-15}$    |
| R+OH→IM10+H <sub>2</sub> O | $1.27 \times 10^{-15}$    | $1.84 \times 10^{-15}$    |
| R+OH→IM11+H <sub>2</sub> O | $1.37 \times 10^{-13}$    | $1.55 \times 10^{-15}$    |
| R+OH                       | $(k)1.29 \times 10^{-10}$ | $(k)1.33 \times 10^{-11}$ |

**Table S3** Arrhenius formulas of rate constants ( $\text{cm}^3 \text{ molecule}^{-1} \text{ s}^{-1}$ ) for the H-abstraction reactions at 180-380 K

| Reactions                  | $k_{298 \text{ K}}$    | Arrhenius formulas                          | $R^2$  |
|----------------------------|------------------------|---------------------------------------------|--------|
| R+OH→IM3+H <sub>2</sub> O  | $2.17 \times 10^{-13}$ | $k(T)=2.00 \times 10^{-15} \exp(-295.60/T)$ | 0.9932 |
| R+OH→IM4+H <sub>2</sub> O  | $1.41 \times 10^{-14}$ | $k(T)=1.32 \times 10^{-13} \exp(-656.38/T)$ | 0.9994 |
| R+OH→IM5+H <sub>2</sub> O  | $4.68 \times 10^{-13}$ | $k(T)=1.12 \times 10^{-12} \exp(-249.30/T)$ | 0.9961 |
| R+OH→IM6+H <sub>2</sub> O  | $1.02 \times 10^{-12}$ | $k(T)=2.05 \times 10^{-12} \exp(-198.62/T)$ | 0.9952 |
| R+OH→IM7+H <sub>2</sub> O  | $6.30 \times 10^{-14}$ | $k(T)=5.60 \times 10^{-14} \exp(-387.70/T)$ | 0.9975 |
| R+OH→IM8+H <sub>2</sub> O  | $2.17 \times 10^{-13}$ | $k(T)=1.40 \times 10^{-13} \exp(-134.42/T)$ | 0.9990 |
| R+OH→IM9+H <sub>2</sub> O  | $2.98 \times 10^{-15}$ | $k(T)=3.09 \times 10^{-13} \exp(-1377.3/T)$ | 0.9997 |
| R+OH→IM10+H <sub>2</sub> O | $5.31 \times 10^{-14}$ | $k(T)=1.13 \times 10^{-12} \exp(-900.06/T)$ | 0.9993 |
| R+OH→IM11+H <sub>2</sub> O | $3.68 \times 10^{-13}$ | $k(T)=4.08 \times 10^{-12} \exp(-706.25/T)$ | 0.9991 |



**Table S4** Cartesian coordinates for the optimized stationary points

| Optimized stationary points | Cartesian coordinates |             |             |             |
|-----------------------------|-----------------------|-------------|-------------|-------------|
| TS1                         | C                     | -1.32310000 | -0.99700800 | -0.68124400 |
|                             | H                     | -1.58290800 | -1.62348800 | 0.17560100  |
|                             | H                     | -1.77834500 | -1.48039900 | -1.54640800 |
|                             | C                     | -1.93237900 | 0.35705500  | -0.49587900 |
|                             | C                     | -1.17788700 | 1.41090300  | -0.17450200 |
|                             | H                     | -1.65419800 | 2.37820700  | -0.07054100 |
|                             | C                     | 0.29172300  | 1.35820400  | 0.07121800  |
|                             | H                     | 0.50831700  | 1.93937600  | 0.96737700  |
|                             | H                     | 0.82825900  | 1.85343100  | -0.74314300 |
|                             | C                     | 0.18103700  | -0.92666400 | -0.85601400 |
|                             | H                     | 0.39715500  | -0.48912300 | -1.83361300 |
|                             | H                     | 0.58943900  | -1.93510900 | -0.85216800 |
|                             | C                     | 0.82024300  | -0.06093800 | 0.21937000  |
|                             | H                     | 0.50176100  | -0.44688400 | 1.19223800  |
|                             | C                     | 2.35887100  | -0.10919100 | 0.19923700  |
|                             | C                     | 2.95275500  | 0.88378400  | 1.17686000  |
|                             | H                     | 4.03113400  | 0.75718500  | 1.22074500  |
|                             | H                     | 2.75079000  | 1.90220500  | 0.85990000  |
|                             | H                     | 2.54350000  | 0.73757000  | 2.17432000  |
|                             | C                     | 2.87217800  | -1.50193100 | 0.52461300  |
|                             | H                     | 2.54466000  | -2.23886300 | -0.20582800 |
|                             | H                     | 3.95908900  | -1.49759400 | 0.52716400  |
|                             | H                     | 2.52618500  | -1.82723200 | 1.50356000  |
|                             | O                     | 2.84553900  | 0.29362700  | -1.07012700 |
|                             | H                     | 2.63247000  | -0.37918800 | -1.71438800 |
|                             | C                     | -3.39202600 | 0.46424900  | -0.65631700 |
| H                           | -3.91058900           | -0.13993800 | 0.18423200  |             |
| H                           | -3.76541200           | 1.48132400  | -0.59155600 |             |
| H                           | -3.76931900           | -0.02500300 | -1.55236200 |             |
| O                           | -4.47611200           | -0.80646500 | 1.36227900  |             |
| H                           | -4.21590300           | -0.13454400 | 2.00360800  |             |
| TS2                         | C                     | 1.05813400  | -1.87333900 | -0.04894100 |
|                             | H                     | 0.99373900  | -2.32944200 | -1.04015500 |
|                             | H                     | 1.43923800  | -2.65167000 | 0.61377600  |
|                             | C                     | 2.04857900  | -0.74350300 | -0.09399500 |
|                             | C                     | 1.59795200  | 0.49871500  | -0.05435200 |
|                             | H                     | 2.42306500  | 1.37949000  | -0.11792200 |
|                             | C                     | 0.19078900  | 0.96659000  | -0.01270000 |
|                             | H                     | 0.06599300  | 1.77885900  | -0.72656800 |
|                             | H                     | -0.05353600 | 1.37522500  | 0.97066400  |
|                             | C                     | -0.31107500 | -1.41780400 | 0.41543800  |
|                             | H                     | -0.25540100 | -1.18258300 | 1.48074900  |

|     |   |             |             |             |
|-----|---|-------------|-------------|-------------|
|     | H | -1.01770600 | -2.23758600 | 0.29940900  |
|     | C | -0.77176200 | -0.17504600 | -0.33332600 |
|     | H | -0.70661500 | -0.38192000 | -1.40512000 |
|     | C | -2.23293100 | 0.20481700  | -0.03026700 |
|     | C | -2.58719900 | 1.55137300  | -0.62554300 |
|     | H | -3.64524500 | 1.75072700  | -0.47899400 |
|     | H | -2.02798900 | 2.34468700  | -0.13929800 |
|     | H | -2.37220300 | 1.57278600  | -1.69181600 |
|     | C | -3.19396700 | -0.84698800 | -0.55982500 |
|     | H | -3.03203500 | -1.81923200 | -0.09876400 |
|     | H | -4.21609700 | -0.54465400 | -0.34721600 |
|     | H | -3.08659300 | -0.96645000 | -1.63581000 |
|     | O | -2.41665200 | 0.36211900  | 1.36599400  |
|     | H | -2.35402300 | -0.49347900 | 1.78688600  |
|     | C | 3.49262900  | -1.10232500 | -0.19117300 |
|     | H | 4.11567700  | -0.21667400 | -0.26319600 |
|     | H | 3.80495700  | -1.68180700 | 0.67745500  |
|     | H | 3.67171500  | -1.72574900 | -1.06708200 |
|     | O | 3.32136300  | 2.29625100  | 0.05623000  |
|     | H | 3.26848600  | 2.38757000  | 1.01330900  |
| TS3 | C | 1.76535000  | -1.36758800 | -0.61762600 |
|     | H | 1.80772600  | -1.23113400 | -1.70188700 |
|     | H | 2.32439500  | -2.28202200 | -0.41420300 |
|     | C | 2.44333700  | -0.21743800 | 0.05804900  |
|     | C | 1.72540900  | 0.74457500  | 0.63774000  |
|     | H | 2.24107500  | 1.53663700  | 1.16727200  |
|     | C | 0.24944900  | 0.82460500  | 0.59975000  |
|     | H | -0.03070800 | 1.85836600  | 0.19171800  |
|     | H | -0.18158700 | 0.84127600  | 1.60324000  |
|     | C | 0.32674200  | -1.52692400 | -0.16619200 |
|     | H | 0.32585700  | -1.85830500 | 0.87478200  |
|     | H | -0.15220700 | -2.30419300 | -0.75798700 |
|     | C | -0.43186100 | -0.21160900 | -0.27463700 |
|     | H | -0.36664000 | 0.12294400  | -1.31368700 |
|     | C | -1.92931900 | -0.33300500 | 0.06365000  |
|     | C | -2.60383200 | 1.02200700  | 0.02279000  |
|     | H | -3.67006800 | 0.90299200  | 0.19608300  |
|     | H | -2.20970600 | 1.67628300  | 0.79404100  |
|     | H | -2.44815800 | 1.50518700  | -0.93827600 |
|     | C | -2.63947600 | -1.27988100 | -0.88853800 |
|     | H | -2.26952600 | -2.29999100 | -0.80435200 |
|     | H | -3.70210000 | -1.29391100 | -0.66066700 |
|     | H | -2.51333700 | -0.96196100 | -1.92139800 |
|     | O | -2.09042200 | -0.78839700 | 1.39722000  |
|     | H | -1.83834900 | -1.70862500 | 1.44722300  |
|     | C | 3.93359600  | -0.22928500 | 0.07243500  |

|     |   |             |             |             |
|-----|---|-------------|-------------|-------------|
|     | H | 4.33998000  | 0.65295900  | 0.55866100  |
|     | H | 4.31106100  | -1.11114700 | 0.59009900  |
|     | H | 4.32852200  | -0.27094900 | -0.94311400 |
|     | O | -0.16952200 | 3.10904600  | -0.65413000 |
|     | H | 0.74695600  | 3.10765600  | -0.95677700 |
| TS4 | C | 1.70767000  | -0.58089900 | -1.13380000 |
|     | H | 1.75295200  | 0.26149400  | -1.82834400 |
|     | H | 2.25451200  | -1.39362300 | -1.61415100 |
|     | C | 2.39995300  | -0.21246300 | 0.14209800  |
|     | C | 1.71295000  | 0.00972400  | 1.26088900  |
|     | H | 2.25605200  | 0.24304100  | 2.16829900  |
|     | C | 0.22191400  | -0.01301200 | 1.36043500  |
|     | H | -0.10383600 | 0.85201500  | 1.93675700  |
|     | H | -0.11488500 | -0.89105800 | 1.92061700  |
|     | C | 0.26399800  | -0.98951400 | -0.91203300 |
|     | H | 0.24561600  | -1.97486800 | -0.43796000 |
|     | H | -0.23942100 | -1.07855700 | -1.87185400 |
|     | C | -0.44651000 | -0.01720200 | 0.00490500  |
|     | H | -0.27524200 | 1.04508800  | -0.44544900 |
|     | C | -1.97448400 | -0.16558300 | 0.05082200  |
|     | C | -2.58364700 | 0.74894000  | 1.09103900  |
|     | H | -3.66739300 | 0.70091200  | 1.03047500  |
|     | H | -2.29284800 | 0.44091500  | 2.09064300  |
|     | H | -2.26540400 | 1.77610000  | 0.92748700  |
|     | C | -2.59520600 | 0.12363000  | -1.30390600 |
|     | H | -2.25355900 | -0.57228300 | -2.06752100 |
|     | H | -3.67615600 | 0.03521700  | -1.23331700 |
|     | H | -2.34618000 | 1.12968800  | -1.63357900 |
|     | O | -2.29868400 | -1.48252200 | 0.46750700  |
|     | H | -2.10553600 | -2.09012600 | -0.24453800 |
|     | C | 3.88849000  | -0.12627800 | 0.08417700  |
|     | H | 4.31170200  | 0.18531700  | 1.03490600  |
|     | H | 4.32236100  | -1.08957800 | -0.18374000 |
|     | H | 4.20739900  | 0.58284800  | -0.68003400 |
|     | O | 0.22016600  | 2.34741400  | -0.77423800 |
|     | H | 1.04723700  | 2.25426000  | -0.28260200 |
| TS5 | C | 1.71733800  | 1.10661900  | 0.27333600  |
|     | H | 1.70053400  | 1.36461300  | 1.33480300  |
|     | H | 2.18269400  | 1.95008300  | -0.23875900 |
|     | C | 2.56036100  | -0.12206300 | 0.06335800  |
|     | C | 2.00457800  | -1.29013000 | -0.24733500 |
|     | H | 2.65239900  | -2.14108800 | -0.41709200 |
|     | C | 0.53292700  | -1.53208700 | -0.35720300 |
|     | H | 0.29100400  | -2.48518400 | 0.11197300  |
|     | H | 0.23881200  | -1.62489100 | -1.40607500 |
|     | C | 0.32668700  | 0.86602500  | -0.24420000 |

|     |   |             |             |             |
|-----|---|-------------|-------------|-------------|
|     | H | 0.30646700  | 0.84385700  | -1.33301500 |
|     | H | -0.37079900 | 1.78252100  | 0.01565200  |
|     | C | -0.27031100 | -0.41153300 | 0.29644200  |
|     | H | -0.07623300 | -0.45520600 | 1.37121700  |
|     | C | -1.79938200 | -0.50052200 | 0.09293400  |
|     | C | -2.28420500 | -1.93342100 | 0.04128800  |
|     | H | -3.36966400 | -1.94380800 | -0.00812900 |
|     | H | -1.90345900 | -2.43867500 | -0.84160500 |
|     | H | -1.97158000 | -2.48594900 | 0.92510400  |
|     | C | -2.50297000 | 0.22572500  | 1.22929000  |
|     | H | -2.15513900 | 1.25027400  | 1.33187300  |
|     | H | -3.57317500 | 0.24751100  | 1.03744400  |
|     | H | -2.33343000 | -0.28884200 | 2.17292600  |
|     | O | -2.16121600 | 0.06792400  | -1.14848600 |
|     | H | -2.12318100 | 1.02460300  | -1.06436100 |
|     | C | 4.03363200  | 0.06315300  | 0.20654700  |
|     | H | 4.28133600  | 0.45706000  | 1.19243500  |
|     | H | 4.56947600  | -0.87194100 | 0.07091900  |
|     | H | 4.40998600  | 0.78109700  | -0.52228100 |
|     | O | -1.32204900 | 2.79123500  | -0.22945300 |
|     | H | -0.80185400 | 3.33009900  | -0.83625200 |
| TS6 | C | -1.63226800 | 0.57729900  | 0.82810500  |
|     | H | -1.81457600 | 1.49960500  | 0.17342100  |
|     | H | -2.18580600 | 0.82056400  | 1.73557700  |
|     | C | -2.21385000 | -0.60345600 | 0.14522300  |
|     | C | -1.41900900 | -1.48090500 | -0.46861800 |
|     | H | -1.86735800 | -2.35026300 | -0.93401800 |
|     | C | 0.06427400  | -1.36037700 | -0.56989000 |
|     | H | 0.35797200  | -1.58882800 | -1.59407600 |
|     | H | 0.54263900  | -2.12086600 | 0.05381600  |
|     | C | -0.14778600 | 0.46965100  | 1.08187800  |
|     | H | 0.01110800  | -0.25857900 | 1.88265700  |
|     | H | 0.22294700  | 1.42969100  | 1.43292300  |
|     | C | 0.58798000  | 0.00975100  | -0.16708200 |
|     | H | 0.35364000  | 0.72235400  | -0.96304800 |
|     | C | 2.11843700  | 0.01289500  | -0.00121900 |
|     | C | 2.79901500  | -0.54417600 | -1.23437400 |
|     | H | 3.87688300  | -0.45024800 | -1.13379700 |
|     | H | 2.56690800  | -1.59752500 | -1.35806100 |
|     | H | 2.48341200  | -0.00697100 | -2.12630300 |
|     | C | 2.64232100  | 1.41130000  | 0.27651200  |
|     | H | 2.27414300  | 1.80395700  | 1.22228700  |
|     | H | 3.72791800  | 1.39097800  | 0.32676500  |
|     | H | 2.34351800  | 2.10388800  | -0.50725300 |
|     | O | 2.50004300  | -0.85764400 | 1.05140600  |
|     | H | 2.26266100  | -0.46049400 | 1.88724200  |

|     |   |             |             |             |
|-----|---|-------------|-------------|-------------|
|     | C | -3.69893900 | -0.74427300 | 0.18339400  |
|     | H | -4.18295900 | 0.14319400  | -0.22468700 |
|     | H | -4.03437700 | -1.60739300 | -0.38460600 |
|     | H | -4.05424100 | -0.85084200 | 1.20802400  |
|     | O | -1.93193700 | 2.49354000  | -0.98694300 |
|     | H | -2.03033400 | 1.80435500  | -1.65614300 |
| TS7 | C | 1.84390500  | 1.05606300  | 0.71236600  |
|     | H | 1.95315000  | 0.91255800  | 1.79134000  |
|     | H | 2.24797500  | 2.04842100  | 0.50602000  |
|     | C | 2.66223900  | 0.03165300  | -0.01021400 |
|     | C | 2.08195200  | -0.98674100 | -0.63827500 |
|     | H | 2.70525400  | -1.69199000 | -1.17429900 |
|     | C | 0.61286800  | -1.25806800 | -0.64080500 |
|     | H | 0.45833800  | -2.32030000 | -0.45257600 |
|     | H | 0.19363400  | -1.06362700 | -1.63285300 |
|     | C | 0.38218500  | 1.00335800  | 0.31825000  |
|     | H | 0.28112500  | 1.36901300  | -0.70458700 |
|     | H | -0.19776900 | 1.67450400  | 0.94686600  |
|     | C | -0.13847100 | -0.42473300 | 0.38657900  |
|     | H | 0.09516700  | -0.81894300 | 1.38031300  |
|     | C | -1.66208100 | -0.53281100 | 0.22489400  |
|     | C | -2.11175400 | -1.98629200 | 0.13505600  |
|     | H | -3.19667700 | -2.03766500 | 0.13068500  |
|     | H | -1.74569400 | -2.45252700 | -0.77383900 |
|     | H | -1.73526000 | -2.54273400 | 0.99087200  |
|     | C | -2.39982300 | 0.13440400  | 1.37646500  |
|     | H | -2.16579300 | 1.19266100  | 1.43162900  |
|     | H | -3.47199600 | 0.03135300  | 1.23083800  |
|     | H | -2.12997000 | -0.34103600 | 2.31675100  |
|     | O | -2.08496900 | 0.02019900  | -1.00080000 |
|     | H | -1.87574900 | 1.07437900  | -1.10815700 |
|     | C | 4.14126700  | 0.22534000  | 0.00981200  |
|     | H | 4.51346600  | 0.26301000  | 1.03409100  |
|     | H | 4.65950800  | -0.57627100 | -0.50925300 |
|     | H | 4.41725700  | 1.17054000  | -0.45802400 |
|     | O | -2.20729600 | 2.26011600  | -0.88417400 |
|     | H | -3.14158100 | 2.29309900  | -1.11080000 |
| TS8 | C | 2.02160100  | -0.88594800 | -0.87519600 |
|     | H | 1.96110600  | -0.51776800 | -1.90300300 |
|     | H | 2.69781400  | -1.74176000 | -0.90847400 |
|     | C | 2.61393500  | 0.17504600  | -0.00043500 |
|     | C | 1.85978200  | 0.84701500  | 0.86398300  |
|     | H | 2.33038400  | 1.58588800  | 1.50091300  |
|     | C | 0.38288500  | 0.67868700  | 1.01325300  |
|     | H | -0.07012500 | 1.66993700  | 1.06950900  |
|     | H | 0.14900800  | 0.19132100  | 1.96418800  |

|     |   |             |             |             |
|-----|---|-------------|-------------|-------------|
|     | C | 0.65360900  | -1.32557200 | -0.39348000 |
|     | H | 0.77502900  | -1.89100900 | 0.53313600  |
|     | H | 0.21009600  | -1.99476500 | -1.12889500 |
|     | C | -0.23780500 | -0.12404000 | -0.12012100 |
|     | H | -0.25420900 | 0.49718300  | -1.01930600 |
|     | C | -1.69613500 | -0.51919900 | 0.17138200  |
|     | C | -2.50171600 | 0.65333700  | 0.67732600  |
|     | H | -3.56553900 | 0.44289400  | 0.72802700  |
|     | H | -2.13931800 | 1.06277800  | 1.61320800  |
|     | H | -2.42877400 | 1.53210800  | -0.14788300 |
|     | C | -2.37352000 | -1.08189000 | -1.06483700 |
|     | H | -1.86422100 | -1.96657100 | -1.44045600 |
|     | H | -3.39702000 | -1.36049200 | -0.82685200 |
|     | H | -2.39071700 | -0.33651200 | -1.85686100 |
|     | O | -1.75046200 | -1.45486400 | 1.23689700  |
|     | H | -1.42371200 | -2.29749400 | 0.92523500  |
|     | C | 4.07796200  | 0.41897500  | -0.14962800 |
|     | H | 4.32411800  | 0.68345400  | -1.17840400 |
|     | H | 4.41986000  | 1.22225100  | 0.49703900  |
|     | H | 4.64954600  | -0.47829900 | 0.08824100  |
|     | O | -2.17458500 | 2.43616600  | -1.05904200 |
|     | H | -1.38653200 | 2.82798400  | -0.66568700 |
| TS9 | C | -1.86811900 | 0.96694100  | 0.82837800  |
|     | H | -1.71694800 | 1.95939200  | 0.39567800  |
|     | H | -2.45338300 | 1.12575800  | 1.73562200  |
|     | C | -2.65339100 | 0.11979900  | -0.12394200 |
|     | C | -2.06654300 | -0.85254700 | -0.81454900 |
|     | H | -2.67300400 | -1.46127200 | -1.47401600 |
|     | C | -0.60608300 | -1.16200400 | -0.77951500 |
|     | H | -0.25679400 | -1.28501600 | -1.80419400 |
|     | H | -0.43467800 | -2.12335900 | -0.28683800 |
|     | C | -0.53098800 | 0.34380400  | 1.17833900  |
|     | H | -0.71638700 | -0.53305900 | 1.80508600  |
|     | H | 0.05007900  | 1.05117300  | 1.76718400  |
|     | C | 0.21135200  | -0.08733000 | -0.07822100 |
|     | H | 0.28588600  | 0.78078700  | -0.73798600 |
|     | C | 1.65181200  | -0.54785200 | 0.19506300  |
|     | C | 2.30611300  | -1.09524300 | -1.05427100 |
|     | H | 3.34608400  | -1.33739600 | -0.85010200 |
|     | H | 1.81034800  | -2.00499800 | -1.37656200 |
|     | H | 2.26487900  | -0.35963100 | -1.85409500 |
|     | C | 2.49610100  | 0.58483900  | 0.74351200  |
|     | H | 2.13633900  | 1.01669700  | 1.67276900  |
|     | H | 3.54394400  | 0.31324600  | 0.82667800  |
|     | H | 2.41903500  | 1.48107400  | -0.04611700 |
|     | O | 1.68301200  | -1.61196600 | 1.13265600  |

|      |   |             |             |             |
|------|---|-------------|-------------|-------------|
|      | H | 1.26083500  | -1.32838600 | 1.94235100  |
|      | C | -4.10809600 | 0.42808000  | -0.24236300 |
|      | H | -4.26110100 | 1.46443300  | -0.54511400 |
|      | H | -4.59663800 | -0.21229700 | -0.97142000 |
|      | H | -4.61398000 | 0.30406100  | 0.71544000  |
|      | O | 2.35644500  | 2.40677500  | -1.00062000 |
|      | H | 3.29687300  | 2.59938600  | -1.08524900 |
| TS10 | C | -1.02672500 | -1.43680700 | -1.30434900 |
|      | H | -0.91175600 | -2.50224800 | -1.49627400 |
|      | H | -1.65295200 | -1.02972500 | -2.09516500 |
|      | C | -1.76859800 | -1.32192500 | 0.02416600  |
|      | C | -1.35991200 | -0.02490600 | 0.72227400  |
|      | H | -1.95180300 | 0.10325900  | 1.63052600  |
|      | C | 0.12350900  | -0.00142600 | 1.04244700  |
|      | H | 0.25962500  | -0.38913300 | 2.04895100  |
|      | H | 0.44307800  | 1.03942100  | 1.05529600  |
|      | C | 0.33163000  | -0.74119900 | -1.31268400 |
|      | H | 0.19621700  | 0.30320800  | -1.59852900 |
|      | H | 0.95616200  | -1.20500600 | -2.07278700 |
|      | C | 0.98400600  | -0.79569300 | 0.05935600  |
|      | H | 0.99325600  | -1.83898100 | 0.37828300  |
|      | C | 2.44233700  | -0.30838100 | 0.06410400  |
|      | C | 2.99108100  | -0.25786000 | 1.47516700  |
|      | H | 4.03990300  | 0.02603300  | 1.45208100  |
|      | H | 2.45948700  | 0.47850800  | 2.07003600  |
|      | H | 2.90214300  | -1.22906600 | 1.95722100  |
|      | C | 3.32907900  | -1.20298300 | -0.78594300 |
|      | H | 3.03579100  | -1.19007400 | -1.83370800 |
|      | H | 4.35824300  | -0.85813300 | -0.72603000 |
|      | H | 3.28868400  | -2.23406500 | -0.44128000 |
|      | O | 2.52243100  | 1.02621600  | -0.40818100 |
|      | H | 2.31882000  | 1.03913100  | -1.34175300 |
|      | C | -3.26466900 | -1.42189000 | -0.16903200 |
|      | H | -3.77910900 | -1.42060700 | 0.79248700  |
|      | H | -3.63600600 | -0.58099300 | -0.74660200 |
|      | H | -3.50760700 | -2.34658700 | -0.68719300 |
|      | O | -1.31281300 | -2.38848400 | 0.83849200  |
|      | O | -1.75459700 | 2.22187900  | 0.50305800  |
|      | O | -1.76738000 | 0.99227900  | -0.18667600 |
|      | H | -1.88299500 | -2.46207900 | 1.60223800  |
|      | N | -1.00773600 | 3.12394000  | -0.43485800 |
|      | O | 0.11667800  | 3.08660700  | -0.22129600 |
| TS11 | C | 0.09152800  | 1.92971700  | -1.04532000 |
|      | H | -0.34749700 | 2.91552800  | -0.90127700 |
|      | H | 0.69186500  | 1.97023600  | -1.95173300 |
|      | C | 1.01326800  | 1.69849500  | 0.14488000  |

|      |   |             |             |             |
|------|---|-------------|-------------|-------------|
|      | C | 1.08073600  | 0.18036100  | 0.45538900  |
|      | H | 1.79302700  | 0.04620500  | 1.27567200  |
|      | C | -0.29083400 | -0.35442100 | 0.83834100  |
|      | H | -0.39741600 | -0.27872000 | 1.91764200  |
|      | H | -0.31133300 | -1.41300500 | 0.58074700  |
|      | C | -0.99876200 | 0.87363000  | -1.20132300 |
|      | H | -0.60557800 | 0.04510400  | -1.79178500 |
|      | H | -1.82359600 | 1.30936500  | -1.75991100 |
|      | C | -1.46032100 | 0.34852500  | 0.14881300  |
|      | H | -1.75461300 | 1.20613400  | 0.75463100  |
|      | C | -2.68703200 | -0.57674200 | 0.06308100  |
|      | C | -3.05630000 | -1.10139100 | 1.43548800  |
|      | H | -3.94809800 | -1.71850700 | 1.36556300  |
|      | H | -2.25730500 | -1.71430000 | 1.84142200  |
|      | H | -3.25205400 | -0.27992200 | 2.12136100  |
|      | C | -3.88409400 | 0.13890200  | -0.54044500 |
|      | H | -3.71621500 | 0.40236100  | -1.58242000 |
|      | H | -4.75448400 | -0.51101700 | -0.50232300 |
|      | H | -4.11002800 | 1.05330500  | 0.00457900  |
|      | O | -2.38879500 | -1.73201100 | -0.70085500 |
|      | H | -2.19669700 | -1.47044500 | -1.59980500 |
|      | C | 2.38865300  | 2.27933800  | -0.08744900 |
|      | H | 3.01151300  | 2.16767100  | 0.80019400  |
|      | H | 2.88630600  | 1.76832000  | -0.90626900 |
|      | H | 2.30679100  | 3.33826800  | -0.32097600 |
|      | O | 0.40275700  | 2.31014000  | 1.26138500  |
|      | O | 1.90046200  | -2.10448300 | -0.36181300 |
|      | O | 1.59957200  | -0.36713700 | -0.70775200 |
|      | H | 1.03049600  | 2.34506200  | 1.98178300  |
|      | N | 3.04718900  | -2.33014700 | 0.00497600  |
|      | O | 3.89144700  | -1.52764700 | 0.18020300  |
| TS12 | C | -1.33408600 | -1.24066100 | -0.85742100 |
|      | H | -1.21735000 | -2.28054000 | -0.54285500 |
|      | H | -1.90633300 | -1.24452600 | -1.78227400 |
|      | C | -2.14940900 | -0.56974900 | 0.19962300  |
|      | C | -1.28864200 | 1.44730300  | 0.19794600  |
|      | H | -2.00354200 | 1.65874400  | 1.01215000  |
|      | C | 0.11961700  | 1.12425900  | 0.64407900  |
|      | H | 0.16569000  | 1.18940400  | 1.72894200  |
|      | H | 0.73003500  | 1.92787400  | 0.22930800  |
|      | C | 0.04807000  | -0.64294300 | -1.11961900 |
|      | H | -0.05808100 | 0.21350600  | -1.78307700 |
|      | H | 0.63457900  | -1.39687000 | -1.63917700 |
|      | C | 0.72533100  | -0.20343900 | 0.16956500  |
|      | H | 0.53335800  | -0.96562500 | 0.92599900  |
|      | C | 2.25611200  | -0.08457200 | 0.04950200  |



|      |   |             |             |             |
|------|---|-------------|-------------|-------------|
|      | C | 2.86181400  | 0.42748200  | 1.34055700  |
|      | H | 3.94443900  | 0.45550000  | 1.25030400  |
|      | H | 2.52154300  | 1.43475500  | 1.55918900  |
|      | H | 2.59815800  | -0.22199200 | 2.17249300  |
|      | C | 2.89316100  | -1.42170400 | -0.29601100 |
|      | H | 2.59165400  | -1.77859400 | -1.27789200 |
|      | H | 3.97469400  | -1.31473700 | -0.30432100 |
|      | H | 2.62641400  | -2.18288700 | 0.43458600  |
|      | O | 2.60430100  | 0.87862300  | -0.92731100 |
|      | H | 2.24985100  | 0.61180000  | -1.77427100 |
|      | C | -3.57095800 | -0.24116500 | -0.07609400 |
|      | H | -4.02181600 | 0.30809600  | 0.75060000  |
|      | H | -3.63413700 | 0.38258200  | -0.96262300 |
|      | H | -4.15622300 | -1.14986500 | -0.23822000 |
|      | O | -1.86348000 | -1.03276800 | 1.44560800  |
|      | O | -1.54630100 | 1.83843300  | -0.93682600 |
|      | H | -2.49515600 | -0.68979500 | 2.07661400  |
| TS13 | C | 1.12588800  | 0.71327600  | -0.02769900 |
|      | H | 0.93075800  | 1.60351200  | 0.57399100  |
|      | H | 1.13984800  | 1.05327800  | -1.06353700 |
|      | C | 2.50093300  | 0.24953200  | 0.34614400  |
|      | C | -1.36505900 | 2.58600300  | -0.47966000 |
|      | H | -1.79756900 | 2.56357100  | -1.49679600 |
|      | C | -1.71517000 | 1.41748300  | 0.37909500  |
|      | H | -2.79375000 | 1.44808000  | 0.53405000  |
|      | H | -1.25652900 | 1.53958000  | 1.35744200  |
|      | C | 0.06580200  | -0.34492600 | 0.19280900  |
|      | H | 0.05249300  | -0.60275200 | 1.25344600  |
|      | H | 0.36979700  | -1.24317500 | -0.34021800 |
|      | C | -1.32579900 | 0.07971800  | -0.26185100 |
|      | H | -1.29494300 | 0.20377000  | -1.34957700 |
|      | C | -2.40587600 | -0.98812100 | 0.02157700  |
|      | C | -3.66703900 | -0.69062300 | -0.76360700 |
|      | H | -4.43780700 | -1.40699300 | -0.49401900 |
|      | H | -4.05291400 | 0.30216500  | -0.55045400 |
|      | H | -3.47811200 | -0.76669900 | -1.83167800 |
|      | C | -1.93109600 | -2.38981700 | -0.31801600 |
|      | H | -1.13298600 | -2.71536100 | 0.34585000  |
|      | H | -2.75747000 | -3.08759400 | -0.21236700 |
|      | H | -1.55986600 | -2.44653300 | -1.33951600 |
|      | O | -2.79132900 | -0.93206600 | 1.38249700  |
|      | H | -2.08008000 | -1.26425400 | 1.92794900  |
|      | C | 3.63723000  | 1.17822600  | 0.07533600  |
|      | H | 4.58107200  | 0.65513000  | 0.18221800  |
|      | H | 3.56462300  | 1.62387100  | -0.91143600 |
|      | H | 3.60251400  | 1.97719300  | 0.81473800  |

|      |   |             |             |             |
|------|---|-------------|-------------|-------------|
|      | O | 2.62922200  | -0.62838000 | 1.25671800  |
|      | O | -0.67518400 | 3.51038100  | -0.14451600 |
|      | H | 2.89557600  | -1.60514100 | 0.59750800  |
|      | O | 2.80462800  | -0.98353500 | -1.13000600 |
|      | O | 3.03097000  | -2.05342000 | -0.48748700 |
| TS14 | C | -1.30189400 | -1.13466800 | -0.79381600 |
|      | H | -1.27474900 | -2.15290100 | -0.40756500 |
|      | H | -1.84346000 | -1.15881800 | -1.73643600 |
|      | C | -2.11412900 | -0.32772400 | 0.20917000  |
|      | C | -1.86174900 | 1.16308400  | 0.05379500  |
|      | H | -2.04931000 | 1.75810100  | 0.96413300  |
|      | C | 0.25086000  | 1.11555700  | 0.66874800  |
|      | H | 0.07241800  | 1.27815700  | 1.72116700  |
|      | H | 0.52307600  | 1.98681400  | 0.08846200  |
|      | C | 0.10800800  | -0.62711700 | -1.05254200 |
|      | H | 0.05719700  | 0.22138400  | -1.73456000 |
|      | H | 0.66103500  | -1.41919800 | -1.55413500 |
|      | C | 0.82012600  | -0.18555100 | 0.22418300  |
|      | H | 0.64589200  | -0.93283600 | 0.99777100  |
|      | C | 2.35496100  | -0.05915500 | 0.03468500  |
|      | C | 2.99328000  | 0.55529800  | 1.26274400  |
|      | H | 4.07230800  | 0.59252100  | 1.13839600  |
|      | H | 2.63657700  | 1.57096700  | 1.41075200  |
|      | H | 2.76271400  | -0.02998600 | 2.15004200  |
|      | C | 2.98590400  | -1.41367300 | -0.23887600 |
|      | H | 2.62319100  | -1.85584700 | -1.16396800 |
|      | H | 4.06296100  | -1.29616100 | -0.32835500 |
|      | H | 2.77935800  | -2.11107100 | 0.56998500  |
|      | O | 2.64617300  | 0.83398300  | -1.02068500 |
|      | H | 2.32671300  | 0.46501500  | -1.84262300 |
|      | C | -3.60073300 | -0.56335600 | 0.00192000  |
|      | H | -4.18893200 | -0.03695100 | 0.75450400  |
|      | H | -3.90842800 | -0.20258400 | -0.97513000 |
|      | H | -3.81677000 | -1.62685100 | 0.07778700  |
|      | O | -1.73901500 | -0.74545600 | 1.50753700  |
|      | O | -1.85000800 | 1.69687700  | -1.04718400 |
|      | H | -2.40679700 | -0.46915300 | 2.13235100  |
| TS15 | C | -1.81356800 | -0.58918800 | -0.55815700 |
|      | H | -1.26567600 | -1.52039600 | -0.71771800 |
|      | H | -2.02693500 | -0.17697900 | -1.54330100 |
|      | C | -3.13586800 | -0.93659600 | 0.10547500  |
|      | C | -4.00563600 | 0.29046100  | 0.27306400  |
|      | H | -4.66188400 | 0.26459900  | 1.15765100  |
|      | C | 1.28024900  | -0.62841400 | 0.14831600  |
|      | H | 0.63976000  | -1.49380100 | 0.32267000  |
|      | H | 1.76958200  | -0.34611400 | 1.08325800  |

|      |   |             |             |             |
|------|---|-------------|-------------|-------------|
|      | C | -0.97322600 | 0.39634100  | 0.23084800  |
|      | H | -0.91159400 | 0.07322100  | 1.27073300  |
|      | H | -1.48949300 | 1.35467800  | 0.22545900  |
|      | C | 0.43547200  | 0.55756300  | -0.33740400 |
|      | H | 0.38501200  | 0.50933000  | -1.42747900 |
|      | C | 1.08164500  | 1.90359200  | 0.04286100  |
|      | C | 2.54927300  | 1.94521500  | -0.32269200 |
|      | H | 2.95313100  | 2.92254200  | -0.07236400 |
|      | H | 3.11411600  | 1.19371700  | 0.22028700  |
|      | H | 2.68726200  | 1.76506500  | -1.38562800 |
|      | C | 0.36617200  | 3.06087400  | -0.63416000 |
|      | H | -0.68546400 | 3.11962400  | -0.36190300 |
|      | H | 0.83905200  | 3.99462800  | -0.34161300 |
|      | H | 0.42461600  | 2.97139400  | -1.71650500 |
|      | O | 1.04050300  | 2.06180200  | 1.45031300  |
|      | H | 0.13751300  | 2.21935300  | 1.72202600  |
|      | C | -3.92918500 | -1.92859400 | -0.73131800 |
|      | H | -4.88017200 | -2.16027000 | -0.25765400 |
|      | H | -4.11694400 | -1.53193600 | -1.72506900 |
|      | H | -3.36373300 | -2.85406600 | -0.83608000 |
|      | O | -2.95953900 | -1.42131000 | 1.41680100  |
|      | O | -4.01822600 | 1.20533200  | -0.50078200 |
|      | H | -2.63186700 | -2.31802500 | 1.38518200  |
|      | O | 2.19009600  | -0.89615800 | -0.86237700 |
|      | O | 3.12980700  | -2.31202500 | -0.26264800 |
|      | N | 4.22449600  | -2.01373800 | 0.19474000  |
|      | O | 4.66489400  | -0.92738000 | 0.30042800  |
| TS16 | C | -1.71729800 | -0.34074900 | -0.69596500 |
|      | H | -1.36176400 | -1.28995400 | -1.10217800 |
|      | H | -1.95804200 | 0.29480600  | -1.54715100 |
|      | C | -3.00052200 | -0.61728400 | 0.06924000  |
|      | C | -3.61915100 | 0.66339900  | 0.58682400  |
|      | H | -4.16700200 | 0.55197700  | 1.53620400  |
|      | C | 1.28584100  | -1.07631800 | -0.51471200 |
|      | H | 0.58038800  | -1.82554300 | -0.11107900 |
|      | H | 2.04122600  | -1.08219300 | 0.51857000  |
|      | C | -0.63633300 | 0.32196200  | 0.13863100  |
|      | H | -0.53945200 | -0.20958300 | 1.08762000  |
|      | H | -0.96469700 | 1.33151300  | 0.37165700  |
|      | C | 0.71128700  | 0.34313000  | -0.57429800 |
|      | H | 0.55697300  | 0.56428900  | -1.63252600 |
|      | C | 1.67944300  | 1.40782300  | -0.02634500 |
|      | C | 3.02403500  | 1.33737700  | -0.71907600 |
|      | H | 3.68220600  | 2.09107100  | -0.29522900 |
|      | H | 3.49158900  | 0.36695400  | -0.60491600 |
|      | H | 2.91254500  | 1.52358400  | -1.78404700 |

|      |   |             |             |             |
|------|---|-------------|-------------|-------------|
|      | C | 1.11989800  | 2.81104900  | -0.18303900 |
|      | H | 0.21609500  | 2.96784200  | 0.40104100  |
|      | H | 1.86079500  | 3.53202300  | 0.15227200  |
|      | H | 0.88351400  | 3.02062700  | -1.22375400 |
|      | O | 1.93489200  | 1.13738900  | 1.34365200  |
|      | H | 1.16215700  | 1.36784700  | 1.85745200  |
|      | C | -4.04097200 | -1.28233300 | -0.81863300 |
|      | H | -4.95988600 | -1.46563200 | -0.26685600 |
|      | H | -4.26556400 | -0.66148300 | -1.68130500 |
|      | H | -3.65940300 | -2.23765300 | -1.17788400 |
|      | O | -2.76790200 | -1.38754200 | 1.22634200  |
|      | O | -3.55863100 | 1.71063100  | 0.00751700  |
|      | H | -2.63816700 | -2.30169400 | 0.98152600  |
|      | O | 2.10639300  | -1.50009400 | -1.38402900 |
|      | O | 3.18189400  | -1.50831200 | 1.14976300  |
|      | O | 3.88949400  | -1.94546300 | 0.27485600  |
| TS17 | C | 0.32609800  | 2.01623100  | -0.51961500 |
|      | H | 0.06397100  | 2.84873800  | 0.13127800  |
|      | H | 0.78254700  | 2.42670100  | -1.41758800 |
|      | C | 1.37144000  | 1.19225500  | 0.23886000  |
|      | C | 1.13541000  | -0.26806600 | -0.18097400 |
|      | H | 1.99123300  | -0.88561700 | 0.49415000  |
|      | C | -0.19567900 | -0.82580700 | 0.31021300  |
|      | H | -0.11569900 | -1.18970300 | 1.33108200  |
|      | H | -0.44887200 | -1.65905200 | -0.34242100 |
|      | C | -0.91653100 | 1.21480400  | -0.89138900 |
|      | H | -0.71031700 | 0.64345600  | -1.80046500 |
|      | H | -1.72424300 | 1.90564300  | -1.12179500 |
|      | C | -1.29063400 | 0.24866600  | 0.22316400  |
|      | H | -1.29902800 | 0.80702100  | 1.15979500  |
|      | C | -2.67889700 | -0.39324700 | 0.06067600  |
|      | C | -2.92712700 | -1.41000300 | 1.15558400  |
|      | H | -3.92803400 | -1.82108600 | 1.05542300  |
|      | H | -2.22047200 | -2.23135700 | 1.08505400  |
|      | H | -2.83441900 | -0.94930200 | 2.13663700  |
|      | C | -3.77964000 | 0.65425000  | 0.08815200  |
|      | H | -3.71537200 | 1.33569000  | -0.75750900 |
|      | H | -4.74851000 | 0.16371100  | 0.04224000  |
|      | H | -3.73406300 | 1.24640000  | 0.99978700  |
|      | O | -2.74916900 | -1.12991400 | -1.14619000 |
|      | H | -2.68441500 | -0.52960000 | -1.88697600 |
|      | C | 2.77653800  | 1.65346600  | -0.05531200 |
|      | H | 3.50000800  | 1.11961300  | 0.56214800  |
|      | H | 3.02393200  | 1.46234800  | -1.09475500 |
|      | H | 2.86980500  | 2.71736600  | 0.14836000  |
|      | O | 1.06731100  | 1.32343500  | 1.61461900  |

|      |   |             |             |             |
|------|---|-------------|-------------|-------------|
|      | O | 1.56069800  | -0.61047900 | -1.33507400 |
|      | H | 1.81747000  | 1.03730500  | 2.13312900  |
|      | O | 3.10178400  | -1.70978900 | 0.65985200  |
|      | O | 3.41795400  | -1.99119800 | -0.47242400 |
| TS18 | C | -0.40420200 | 0.73097900  | 1.57169500  |
|      | H | -0.16832900 | 1.78729200  | 1.69563200  |
|      | H | -0.94299200 | 0.40588800  | 2.46068900  |
|      | C | -1.32541500 | 0.63686300  | 0.37131900  |
|      | C | -0.55948200 | 1.04196100  | -0.88979500 |
|      | H | -1.20755200 | 0.88757100  | -1.75380900 |
|      | C | 0.70516200  | 0.23289500  | -1.06166600 |
|      | H | 1.19210300  | 0.58994300  | -1.96490300 |
|      | H | 0.44567000  | -0.81317400 | -1.21660800 |
|      | C | 0.87990700  | -0.06076100 | 1.39661600  |
|      | H | 0.63060800  | -1.12277000 | 1.34663900  |
|      | H | 1.49421000  | 0.08889300  | 2.28171100  |
|      | C | 1.63300500  | 0.35081500  | 0.13825600  |
|      | H | 1.91755400  | 1.40081000  | 0.24424500  |
|      | C | 2.93430900  | -0.45033900 | -0.06292300 |
|      | C | 3.67900600  | 0.01021000  | -1.29974200 |
|      | H | 4.64400800  | -0.48693800 | -1.35162300 |
|      | H | 3.13020200  | -0.24454900 | -2.20034600 |
|      | H | 3.84056800  | 1.08560300  | -1.27729400 |
|      | C | 3.84860300  | -0.32839700 | 1.14545100  |
|      | H | 3.41943200  | -0.80064900 | 2.02661800  |
|      | H | 4.79497900  | -0.82057700 | 0.93707100  |
|      | H | 4.04591700  | 0.71467300  | 1.38589000  |
|      | O | 2.64702900  | -1.81775100 | -0.30065000 |
|      | H | 2.27044300  | -2.20116400 | 0.48937900  |
|      | C | -2.58194000 | 1.45069300  | 0.56556500  |
|      | H | -3.23343100 | 1.38074300  | -0.30209200 |
|      | H | -3.12990100 | 1.09850000  | 1.43593000  |
|      | H | -2.32404100 | 2.49320200  | 0.73337600  |
|      | O | -0.19115300 | 2.40335600  | -0.79539200 |
|      | O | -1.61999700 | -0.76238700 | 0.30446000  |
|      | O | -2.39853500 | -1.02399600 | -0.84542000 |
|      | O | -4.40802100 | -1.02423900 | -0.00384400 |
|      | N | -3.57000000 | -1.75512200 | -0.28804000 |
|      | H | -0.91775100 | 2.95317600  | -1.07611100 |
| TS19 | C | -0.33943400 | 0.82254700  | 1.55382700  |
|      | H | -0.11163900 | 1.88833800  | 1.57437000  |
|      | H | -0.85993800 | 0.57220600  | 2.47587100  |
|      | C | -1.30109800 | 0.63325400  | 0.37295300  |
|      | C | -0.54827200 | 0.94509900  | -0.92456600 |
|      | H | -1.21165200 | 0.72151500  | -1.76324900 |
|      | C | 0.71209600  | 0.12353900  | -1.05437500 |

|      |   |             |             |             |
|------|---|-------------|-------------|-------------|
|      | H | 1.17889300  | 0.39618900  | -1.99679400 |
|      | H | 0.44796100  | -0.93129500 | -1.10613800 |
|      | C | 0.94392300  | 0.02641900  | 1.41187500  |
|      | H | 0.70547400  | -1.03831200 | 1.45150900  |
|      | H | 1.57489300  | 0.25212800  | 2.26891800  |
|      | C | 1.66640500  | 0.34349500  | 0.10968100  |
|      | H | 1.94396300  | 1.40050300  | 0.12701900  |
|      | C | 2.96959900  | -0.46228300 | -0.05780100 |
|      | C | 3.67924500  | -0.09914900 | -1.34641800 |
|      | H | 4.65038800  | -0.58575700 | -1.37848400 |
|      | H | 3.11451900  | -0.43814900 | -2.20856500 |
|      | H | 3.82410800  | 0.97626600  | -1.42014600 |
|      | C | 3.91143400  | -0.23469300 | 1.11359200  |
|      | H | 3.50594600  | -0.63165200 | 2.04205900  |
|      | H | 4.85595600  | -0.73846600 | 0.92544800  |
|      | H | 4.10784800  | 0.82584400  | 1.25974000  |
|      | O | 2.68829300  | -1.84659300 | -0.17550700 |
|      | H | 2.36425700  | -2.17420900 | 0.66141100  |
|      | C | -2.53816900 | 1.49007800  | 0.54635200  |
|      | H | -3.17685100 | 1.42559700  | -0.33523000 |
|      | H | -3.10616200 | 1.14369200  | 1.40499500  |
|      | H | -2.27582200 | 2.53329800  | 0.70325200  |
|      | O | -0.18035200 | 2.30796600  | -0.95122600 |
|      | O | -1.60966900 | -0.71995600 | 0.44905900  |
|      | O | -2.68118100 | -1.09311000 | -0.95061400 |
|      | O | -4.29581500 | -1.23955100 | 0.45168000  |
|      | N | -3.84370300 | -1.31945600 | -0.63114200 |
|      | H | -0.93081000 | 2.83857300  | -1.20584800 |
| TS20 | C | 1.35314800  | -1.08861100 | -0.93460700 |
|      | H | 1.46776800  | -0.41451700 | -1.78332400 |
|      | H | 1.74770000  | -2.05890500 | -1.24637800 |
|      | C | 2.22977300  | -0.63029600 | 0.21377500  |
|      | C | 1.32988900  | 1.27200100  | 0.35247100  |
|      | H | 1.98243400  | 1.62504400  | 1.14277900  |
|      | C | -0.06486600 | 0.92964800  | 0.71358100  |
|      | H | -0.59297100 | 1.86609600  | 0.90234000  |
|      | H | -0.04245400 | 0.37817000  | 1.64943500  |
|      | C | -0.10614800 | -1.22656100 | -0.55453200 |
|      | H | -0.16042900 | -1.82431900 | 0.35802900  |
|      | H | -0.61052300 | -1.78121900 | -1.34160900 |
|      | C | -0.79977000 | 0.11489300  | -0.34639800 |
|      | H | -0.75891500 | 0.66178200  | -1.29215700 |
|      | C | -2.29125500 | -0.03374900 | 0.02297300  |
|      | C | -3.00605100 | 1.30233600  | -0.01785500 |
|      | H | -4.05640000 | 1.15714300  | 0.21990100  |
|      | H | -2.59968500 | 1.99506300  | 0.71175700  |

|      |   |             |             |             |
|------|---|-------------|-------------|-------------|
|      | H | -2.93134900 | 1.74895000  | -1.00656800 |
|      | C | -3.00566100 | -0.99981700 | -0.90892200 |
|      | H | -2.65840200 | -2.02101100 | -0.76971900 |
|      | H | -4.07209700 | -0.98244100 | -0.70059700 |
|      | H | -2.85132700 | -0.73030800 | -1.95246000 |
|      | O | -2.42763500 | -0.48141500 | 1.35930800  |
|      | H | -2.03460700 | -1.34900500 | 1.44273100  |
|      | C | 3.62460300  | -0.18959300 | -0.16237000 |
|      | H | 4.09482000  | 0.32271400  | 0.67195100  |
|      | H | 4.21642500  | -1.07799400 | -0.38127700 |
|      | H | 3.63746800  | 0.43460100  | -1.05336900 |
|      | O | 2.01281200  | -1.04528000 | 1.36015100  |
|      | O | 1.45404700  | 1.90932800  | -0.83419300 |
|      | H | 2.32677200  | 2.28758500  | -0.92228800 |
| TS21 | C | 1.86924400  | 0.04876400  | -0.05918400 |
|      | H | 1.81653900  | 0.82816500  | 0.70219000  |
|      | H | 1.77035800  | 0.58471800  | -1.00639200 |
|      | C | 3.24968800  | -0.55097700 | -0.01364200 |
|      | C | -1.45714600 | 1.85843000  | 0.79282000  |
|      | H | -1.55889400 | 2.55834700  | 1.62572500  |
|      | C | -0.93016900 | 0.51190500  | 1.14975300  |
|      | H | -1.66752300 | 0.04477500  | 1.80747100  |
|      | H | -0.05452300 | 0.66184300  | 1.78068200  |
|      | C | 0.77689600  | -0.98722600 | 0.08568400  |
|      | H | 0.90070700  | -1.49631900 | 1.04361200  |
|      | H | 0.94788300  | -1.74072500 | -0.67768300 |
|      | C | -0.63206000 | -0.41670500 | -0.02794800 |
|      | H | -0.69316200 | 0.16123300  | -0.95373600 |
|      | C | -1.70822700 | -1.52042000 | -0.13356100 |
|      | C | -3.08722000 | -0.92453000 | -0.32241200 |
|      | H | -3.81677200 | -1.72710300 | -0.38785600 |
|      | H | -3.36797400 | -0.28820200 | 0.51111100  |
|      | H | -3.12829300 | -0.32404700 | -1.22658300 |
|      | C | -1.42597500 | -2.48098900 | -1.27679100 |
|      | H | -0.54559700 | -3.09202200 | -1.09169000 |
|      | H | -2.27116200 | -3.15210200 | -1.40325800 |
|      | H | -1.27139700 | -1.94358700 | -2.21037300 |
|      | O | -1.77609800 | -2.23668500 | 1.08861200  |
|      | H | -0.99511500 | -2.78063200 | 1.17726200  |
|      | C | 4.40378200  | 0.40544100  | -0.06084000 |
|      | H | 4.44642400  | 0.96585600  | 0.87197300  |
|      | H | 5.33071100  | -0.14050200 | -0.19072000 |
|      | H | 4.27846400  | 1.13060100  | -0.86160500 |
|      | O | 3.41747400  | -1.74254300 | 0.06771300  |
|      | O | -2.14907000 | 2.05926800  | -0.24575200 |
|      | H | -1.36043500 | 2.71673500  | -0.91060500 |

|      |   |             |             |             |
|------|---|-------------|-------------|-------------|
|      | O | -0.26837100 | 3.12692300  | -0.98222600 |
|      | O | 0.13692500  | 2.71438900  | 0.14630300  |
| TS22 | C | 1.85631000  | 0.24961500  | -0.43921600 |
|      | H | 1.65164600  | 1.27323300  | -0.11841400 |
|      | H | 1.86370400  | 0.29427300  | -1.53036900 |
|      | C | 3.23983800  | -0.11118700 | 0.02971500  |
|      | C | -1.10782800 | 2.64289900  | 0.19707300  |
|      | H | -0.28922200 | 3.26974400  | -0.11783400 |
|      | C | -0.93388400 | 1.50813000  | 0.91584200  |
|      | H | -1.76513000 | 0.98752600  | 1.36840700  |
|      | H | 0.01675600  | 1.37291800  | 1.40560000  |
|      | C | 0.78656800  | -0.69893600 | 0.05263200  |
|      | H | 0.84642800  | -0.76165100 | 1.14181600  |
|      | H | 1.04455100  | -1.70227300 | -0.30027300 |
|      | C | -0.58496000 | -0.30139100 | -0.38584400 |
|      | H | -0.63907600 | 0.15920300  | -1.36654800 |
|      | C | -1.73468400 | -1.23367200 | -0.09506300 |
|      | C | -3.04841400 | -0.65053300 | -0.57103100 |
|      | H | -3.85592900 | -1.35298200 | -0.38323700 |
|      | H | -3.27642000 | 0.26583400  | -0.03545600 |
|      | H | -3.01028700 | -0.43164700 | -1.63480600 |
|      | C | -1.52154100 | -2.59069300 | -0.76093700 |
|      | H | -0.63263200 | -3.08500800 | -0.37433800 |
|      | H | -2.37686400 | -3.23311300 | -0.56402200 |
|      | H | -1.40429200 | -2.48419100 | -1.83716400 |
|      | O | -1.89779500 | -1.42637200 | 1.30314100  |
|      | H | -1.13235600 | -1.88275400 | 1.64868300  |
|      | C | 4.37367900  | 0.70435500  | -0.51813800 |
|      | H | 5.28758700  | 0.47243200  | 0.01582400  |
|      | H | 4.50832300  | 0.47220000  | -1.57364300 |
|      | H | 4.15909700  | 1.76847300  | -0.45037400 |
|      | O | 3.42824700  | -1.01787900 | 0.80199100  |
|      | O | -2.27444100 | 3.06458000  | -0.33394100 |
|      | H | -2.99447600 | 2.52363200  | -0.01357200 |
| TS23 | C | 1.58534300  | -0.67997700 | 0.08606100  |
|      | H | 1.66335200  | -1.52432300 | -0.60153500 |
|      | H | 1.53918800  | -1.12316900 | 1.08327000  |
|      | C | 2.85448800  | 0.12407100  | -0.00180100 |
|      | C | 0.34279000  | 0.13344800  | -0.19534400 |
|      | H | 0.44705500  | 0.58300600  | -1.18673100 |
|      | H | 0.32423700  | 0.97790900  | 0.50249600  |
|      | C | -0.90654000 | -0.66992200 | -0.09686000 |
|      | H | -0.86473500 | -1.66299500 | 0.32424900  |
|      | C | -2.14361300 | -0.14209500 | -0.33265200 |
|      | C | -3.36813200 | -0.97847600 | -0.48920300 |
|      | H | -4.25571500 | -0.42910200 | -0.19258900 |



|      |   |             |             |             |
|------|---|-------------|-------------|-------------|
|      | H | -3.48094400 | -1.25950600 | -1.53497200 |
|      | H | -3.29321500 | -1.88104900 | 0.10798700  |
|      | C | -2.57838300 | 0.55881100  | 1.74571600  |
|      | H | -1.70137800 | 1.14174200  | 1.98642700  |
|      | H | -3.46060500 | 1.12074700  | 1.47972900  |
|      | H | -2.73026600 | -0.33118300 | 2.33770800  |
|      | O | -2.29174400 | 1.05821600  | -0.95667100 |
|      | H | -1.47906800 | 1.55922600  | -0.90716700 |
|      | C | 4.14301200  | -0.62363400 | 0.17249600  |
|      | H | 4.29991700  | -1.27980900 | -0.68232000 |
|      | H | 4.96839000  | 0.07491300  | 0.24165800  |
|      | H | 4.11115000  | -1.25478300 | 1.05781100  |
|      | O | 2.83410000  | 1.31116300  | -0.21164200 |
| TS24 | C | 1.58147100  | -0.33240600 | -0.23001500 |
|      | H | 1.69253600  | 0.51206900  | 0.45129700  |
|      | H | 1.67164300  | 0.08227200  | -1.23762000 |
|      | C | 2.74245600  | -1.26866000 | -0.02187800 |
|      | C | 0.24465300  | -1.00830700 | -0.03491800 |
|      | H | 0.18821000  | -1.36801600 | 0.99246600  |
|      | H | 0.19781300  | -1.88641800 | -0.67401300 |
|      | C | -0.92962600 | -0.09180100 | -0.32144100 |
|      | H | -0.97385200 | 0.13685000  | -1.38992000 |
|      | C | -2.30975300 | -0.69522300 | 0.04234300  |
|      | C | -3.40550900 | 0.29078900  | -0.29384500 |
|      | H | -4.36840300 | -0.14245500 | -0.03867800 |
|      | H | -3.27193800 | 1.20590100  | 0.27208000  |
|      | H | -3.39922700 | 0.52847500  | -1.35518500 |
|      | C | -2.51722000 | -2.00298500 | -0.69943400 |
|      | H | -1.81162700 | -2.76587100 | -0.37653500 |
|      | H | -3.52103800 | -2.36816300 | -0.49919900 |
|      | H | -2.40548900 | -1.87397300 | -1.77399500 |
|      | O | -2.39861000 | -0.90320100 | 1.43302200  |
|      | H | -1.86004700 | -1.65165700 | 1.68333400  |
|      | C | 4.11265100  | -0.66111800 | -0.05643600 |
|      | H | 4.23644700  | -0.02753600 | -0.93193100 |
|      | H | 4.24838600  | -0.02660500 | 0.81810200  |
|      | H | 4.86374900  | -1.44202600 | -0.05161100 |
|      | O | 2.57489300  | -2.44703000 | 0.17121700  |
|      | O | -0.82036000 | 1.11025700  | 0.38045700  |
|      | O | -0.09209700 | 2.23599100  | -0.79886000 |
|      | N | 0.70489400  | 3.02643400  | -0.31278500 |
|      | O | 1.04415200  | 3.06903000  | 0.81349500  |
| TS25 | C | 1.47591800  | 0.90131800  | -0.52750200 |
|      | H | 2.09899400  | 1.74213200  | -0.82134000 |
|      | H | 1.05579700  | 0.49544100  | -1.45328700 |
|      | C | 2.33703900  | -0.19882600 | 0.02815000  |

|      |   |             |             |             |
|------|---|-------------|-------------|-------------|
|      | C | 0.34722400  | 1.33055100  | 0.40478900  |
|      | H | 0.50379400  | 2.35721300  | 0.72945500  |
|      | H | 0.34895200  | 0.73044800  | 1.31220000  |
|      | C | -1.04108800 | 1.30822000  | -0.21253900 |
|      | H | -1.04962400 | 1.21018900  | -1.31232400 |
|      | C | -1.57910600 | -0.71398300 | -0.11864800 |
|      | C | -1.78024600 | -0.92533800 | 1.34239400  |
|      | H | -2.28157000 | -1.88110300 | 1.50624300  |
|      | H | -0.83418400 | -0.95387100 | 1.87828500  |
|      | H | -2.39618600 | -0.12854300 | 1.74827500  |
|      | C | -2.78889300 | -0.68825500 | -0.98107100 |
|      | H | -2.51868200 | -0.47722500 | -2.01198600 |
|      | H | -3.28307000 | -1.66076200 | -0.95431200 |
|      | H | -3.47780600 | 0.07162400  | -0.62668200 |
|      | O | -0.55710000 | -1.37647300 | -0.68805000 |
|      | H | 0.17834300  | -1.46888800 | -0.06293000 |
|      | C | 3.80840400  | -0.11725700 | -0.20462000 |
|      | H | 4.20801800  | 0.74540400  | 0.32678000  |
|      | H | 4.29836700  | -1.01998600 | 0.13912200  |
|      | H | 4.01067500  | 0.04384400  | -1.26185700 |
|      | O | 1.84746500  | -1.13188800 | 0.63010800  |
|      | O | -1.98253000 | 1.86029900  | 0.36777300  |
| TS26 | C | -0.56289900 | -0.00036200 | 0.21450600  |
|      | O | 0.06077000  | -0.00197500 | 1.32043700  |
|      | H | 1.21444900  | -0.00268700 | 0.92512600  |
|      | O | 1.92459900  | -0.00039000 | -0.00725600 |
|      | O | 1.02374700  | 0.00269200  | -0.89920400 |
|      | C | -1.16301500 | 1.27869100  | -0.27048900 |
|      | H | -0.53087900 | 2.11543300  | 0.00503400  |
|      | H | -2.12931300 | 1.40500000  | 0.21644400  |
|      | C | -1.16215100 | -1.27847200 | -0.27396100 |
|      | H | -2.12596100 | -1.40880700 | 0.21689100  |
|      | H | -1.32498000 | -1.26131200 | -1.34685100 |
|      | H | -0.52722000 | -2.11511600 | -0.00476300 |
|      | H | -1.32063500 | 1.26573500  | -1.34402900 |
| TS27 | C | 1.17541500  | -1.31902100 | -0.98856800 |
|      | H | 1.36499900  | -0.67415800 | -1.83643500 |
|      | H | 1.77205500  | -2.21678500 | -0.91797900 |
|      | C | 2.28147600  | -0.16732200 | 0.47142100  |
|      | C | -0.01502000 | 0.92302200  | 0.63027700  |
|      | H | -0.44526000 | 1.91945700  | 0.67245700  |
|      | H | -0.07096900 | 0.48947200  | 1.62719400  |
|      | C | -0.18728200 | -1.33168200 | -0.41347300 |
|      | H | -0.13994100 | -1.77410300 | 0.58350200  |
|      | H | -0.80106800 | -1.99321200 | -1.03290900 |
|      | C | -0.80730500 | 0.05924800  | -0.34049600 |

|      |   |             |             |             |
|------|---|-------------|-------------|-------------|
|      | H | -0.74153900 | 0.51163000  | -1.33324400 |
|      | C | 3.61798300  | -0.21335400 | -0.22650200 |
|      | H | 4.28448300  | 0.49586000  | 0.26735800  |
|      | H | 4.04675900  | -1.20335800 | -0.11617200 |
|      | H | 3.55334300  | 0.05191800  | -1.27672500 |
|      | O | 2.08096000  | -0.84435900 | 1.47813100  |
|      | C | 1.44191000  | 1.09576300  | 0.26486600  |
|      | H | 1.87368400  | 1.81846000  | 0.96623000  |
|      | C | -2.30389100 | 0.00870600  | 0.03224000  |
|      | C | -2.88388400 | 1.39847800  | 0.20480800  |
|      | H | -2.49823700 | 1.86737300  | 1.10395900  |
|      | H | -2.64895800 | 2.02719500  | -0.65144100 |
|      | H | -3.96403600 | 1.33436800  | 0.30457400  |
|      | C | -3.10998400 | -0.73023800 | -1.02505400 |
|      | H | -2.81722200 | -1.77433700 | -1.11218500 |
|      | H | -4.16320600 | -0.70690000 | -0.75804600 |
|      | H | -2.99079000 | -0.26639400 | -2.00222800 |
|      | O | -2.48059300 | -0.61704900 | 1.29081000  |
|      | H | -2.25296500 | -1.54227700 | 1.21944500  |
|      | O | 1.53520300  | 1.60213800  | -1.04866100 |
|      | H | 2.29781100  | 2.16833500  | -1.12670600 |
| TS28 | C | -1.51983300 | -0.54190900 | 0.80921000  |
|      | H | -1.01342100 | -1.42452200 | 0.41857300  |
|      | H | -2.13245100 | -0.80244600 | 1.67396500  |
|      | C | 1.93630000  | -1.97156700 | -0.48928300 |
|      | C | 1.92106500  | 0.30945600  | 0.50274000  |
|      | H | 2.66561600  | 0.54742100  | -0.25418600 |
|      | H | 2.21099800  | 0.85736400  | 1.40344200  |
|      | C | -0.48513300 | 0.50815000  | 1.19181100  |
|      | H | 0.01006400  | 0.15188700  | 2.09521300  |
|      | H | -1.01829900 | 1.40790900  | 1.49489900  |
|      | C | 0.53899000  | 0.79696900  | 0.08592100  |
|      | H | 0.22677000  | 0.25998000  | -0.81127000 |
|      | C | 3.20663100  | -2.34819900 | -1.17506500 |
|      | H | 3.74079400  | -3.06970800 | -0.56100000 |
|      | H | 2.98431000  | -2.76782800 | -2.14858300 |
|      | H | 3.86244500  | -1.48493800 | -1.26273900 |
|      | O | 0.84612300  | -2.24178200 | -0.93047900 |
|      | C | 2.04604200  | -1.18210700 | 0.79775000  |
|      | H | 1.23560000  | -1.52130800 | 1.44586900  |
|      | C | 0.56959800  | 2.29329400  | -0.29234700 |
|      | C | 1.64237500  | 2.59501600  | -1.32095600 |
|      | H | 2.63193400  | 2.54512500  | -0.87779100 |
|      | H | 1.58992200  | 1.89859400  | -2.15516800 |
|      | H | 1.50745800  | 3.60307800  | -1.70286300 |
|      | C | -0.77508100 | 2.73750900  | -0.83907700 |

|      |   |             |             |             |
|------|---|-------------|-------------|-------------|
|      | H | -0.73400900 | 3.79578200  | -1.08576200 |
|      | H | -1.02878900 | 2.17772500  | -1.73577700 |
|      | H | -1.58616600 | 2.58182100  | -0.13100200 |
|      | O | 0.91760800  | 3.06868600  | 0.84541400  |
|      | H | 0.13780000  | 3.21964600  | 1.37558700  |
|      | O | 3.29503600  | -1.47569800 | 1.36914800  |
|      | H | 3.46973800  | -0.86212800 | 2.07955900  |
|      | O | -2.28805400 | 0.05953800  | -0.18238600 |
|      | O | -3.31230000 | -1.26129200 | -0.84618100 |
|      | O | -4.77088000 | -0.73854900 | 0.63411600  |
|      | N | -4.39232900 | -1.36862300 | -0.28603300 |
| TS29 | C | 0.50723400  | -2.08008600 | -0.36390900 |
|      | H | 0.29326400  | -1.97096900 | -1.44082700 |
|      | H | 1.57404500  | -1.39433900 | -0.39560700 |
|      | C | 1.43481200  | 1.70244300  | -0.65180900 |
|      | C | -0.58491900 | 1.18878000  | 0.70044900  |
|      | H | -1.03737400 | 2.08175500  | 0.27358100  |
|      | H | -0.94600300 | 1.11914800  | 1.72956600  |
|      | C | -0.43630900 | -1.32574500 | 0.56177100  |
|      | H | 0.07719300  | -1.12019500 | 1.49994800  |
|      | H | -1.21097000 | -2.04616400 | 0.82405400  |
|      | C | -1.04265400 | -0.05689900 | -0.04651300 |
|      | H | -0.70450200 | 0.02217500  | -1.08172900 |
|      | C | 1.76946300  | 3.10773200  | -1.01501100 |
|      | H | 2.60254700  | 3.44752500  | -0.40386200 |
|      | H | 2.02006400  | 3.16207300  | -2.06732400 |
|      | H | 0.93641300  | 3.76566300  | -0.77747400 |
|      | O | 1.52616600  | 0.78181300  | -1.42971200 |
|      | C | 0.92128800  | 1.42754200  | 0.74285500  |
|      | H | 1.44333000  | 0.53527700  | 1.09519100  |
|      | O | 1.23403500  | 2.53266600  | 1.54883900  |
|      | C | -2.58365200 | -0.13710900 | -0.10237300 |
|      | C | -3.20130700 | 1.14562100  | -0.62276400 |
|      | H | -3.12719200 | 1.93814200  | 0.11504300  |
|      | H | -2.71694000 | 1.46825300  | -1.54209400 |
|      | H | -4.25681600 | 0.98669400  | -0.82550600 |
|      | C | -3.02367700 | -1.28936400 | -0.98993400 |
|      | H | -2.61994600 | -2.24570500 | -0.66348400 |
|      | H | -4.10815000 | -1.36232800 | -0.97951000 |
|      | H | -2.70101500 | -1.12807900 | -2.01630700 |
|      | O | -3.11170000 | -0.29187500 | 1.20340900  |
|      | H | -2.96612400 | -1.18733100 | 1.50318800  |
|      | O | 0.98906800  | -3.18920000 | 0.02210500  |
|      | O | 3.20775000  | -2.36816800 | 0.39619300  |
|      | O | 2.91191800  | -1.28935300 | -0.05706200 |
|      | H | 0.82860200  | 2.42384000  | 2.40639900  |

|      |   |             |             |             |
|------|---|-------------|-------------|-------------|
| TS30 | C | 1.30839300  | -1.21874400 | -0.72241500 |
|      | H | 1.44120800  | -0.74264000 | -1.69098100 |
|      | H | 1.76691300  | -2.20337400 | -0.73122300 |
|      | C | 1.92238300  | -0.38372100 | 0.36948900  |
|      | C | 1.39133000  | 1.04134900  | 0.38460300  |
|      | H | 1.90161100  | 1.59401700  | 1.17338500  |
|      | C | -0.09178000 | 0.92936300  | 0.70046000  |
|      | H | -0.49243600 | 1.93919700  | 0.72282000  |
|      | H | -0.21378400 | 0.49731900  | 1.69306500  |
|      | C | -0.18519400 | -1.30661300 | -0.40972900 |
|      | H | -0.30262600 | -1.83059900 | 0.54189300  |
|      | H | -0.66210900 | -1.91066100 | -1.17794200 |
|      | C | -0.83160300 | 0.07271400  | -0.32149400 |
|      | H | -0.73141700 | 0.55293600  | -1.29784900 |
|      | C | -2.34002000 | -0.00298500 | -0.00797000 |
|      | C | -2.95584900 | 1.37977600  | 0.06869500  |
|      | H | -4.03615800 | 1.29565300  | 0.15024500  |
|      | H | -2.60139100 | 1.91161500  | 0.94536800  |
|      | H | -2.71597700 | 1.96175000  | -0.81840400 |
|      | C | -3.08064000 | -0.82175600 | -1.05284200 |
|      | H | -2.77340700 | -1.86554800 | -1.04467600 |
|      | H | -4.14792500 | -0.79076200 | -0.85001300 |
|      | H | -2.90728800 | -0.42948500 | -2.05305900 |
|      | O | -2.55122300 | -0.56762300 | 1.27468800  |
|      | H | -2.35248900 | -1.50166600 | 1.24576100  |
|      | C | 3.89221300  | -0.06802200 | -0.49034000 |
|      | H | 4.26573500  | 0.69456100  | 0.17540000  |
|      | H | 4.28443100  | -1.06068400 | -0.34533500 |
|      | H | 3.62357100  | 0.21584800  | -1.49634900 |
|      | O | 2.31837400  | -0.88772300 | 1.42270800  |
|      | O | 1.49511700  | 1.69419200  | -0.85842600 |
|      | H | 2.37998900  | 2.03358200  | -0.96461300 |
| TS31 | C | 1.79909400  | -1.10060100 | -1.02822400 |
|      | H | 1.84134500  | -0.32553700 | -1.79643700 |
|      | H | 2.34884500  | -1.95210000 | -1.43094600 |
|      | C | 2.46941600  | -0.61256800 | 0.21612100  |
|      | C | 1.74377000  | -0.16967400 | 1.23594300  |
|      | H | 2.24618600  | 0.17204400  | 2.13219100  |
|      | C | 0.25440200  | -0.07274700 | 1.24826000  |
|      | H | -0.03873300 | 0.92885800  | 1.55588900  |
|      | H | -0.15479100 | -0.75992900 | 1.99089600  |
|      | C | 0.36182600  | -1.50778100 | -0.77261900 |
|      | H | 0.35746300  | -2.38922400 | -0.13065600 |
|      | H | -0.12225400 | -1.76528500 | -1.71184500 |
|      | C | -0.41594100 | -0.40922900 | -0.07022100 |
|      | C | -1.91218100 | -0.77529400 | 0.15106800  |

|      |   |             |             |             |
|------|---|-------------|-------------|-------------|
|      | C | -2.60584600 | 0.27451100  | 0.99349500  |
|      | H | -3.66447600 | 0.04043700  | 1.06074400  |
|      | H | -2.20223400 | 0.28761700  | 2.00102800  |
|      | H | -2.49158500 | 1.26031800  | 0.55159600  |
|      | C | -2.65218500 | -0.95275600 | -1.16250700 |
|      | H | -2.23385500 | -1.76174200 | -1.75837200 |
|      | H | -3.69110600 | -1.19310500 | -0.95191500 |
|      | H | -2.61396100 | -0.04541000 | -1.75795300 |
|      | O | -1.97273300 | -1.96868400 | 0.90517600  |
|      | H | -1.81398200 | -2.71423100 | 0.32926500  |
|      | C | 3.95996600  | -0.63309900 | 0.23050500  |
|      | H | 4.35861400  | -0.23230300 | 1.15830000  |
|      | H | 4.34014000  | -1.64688100 | 0.10353000  |
|      | H | 4.36020500  | -0.04206800 | -0.59379200 |
|      | O | -0.50148200 | 0.71315800  | -0.97606000 |
|      | O | 0.56792400  | 1.60941100  | -0.80301400 |
|      | N | -0.14657400 | 2.90083000  | -0.59743100 |
|      | O | -0.32042600 | 3.09463500  | 0.52134300  |
| TS32 | C | 1.58317700  | -1.32255300 | -1.02027300 |
|      | H | 1.74165400  | -0.55714500 | -1.78318200 |
|      | H | 2.02558100  | -2.23652600 | -1.41774200 |
|      | C | 2.28867300  | -0.92926100 | 0.23835500  |
|      | C | 1.61151700  | -0.40086700 | 1.25171100  |
|      | H | 2.14292900  | -0.13022500 | 2.15575900  |
|      | C | 0.14396800  | -0.11928300 | 1.25015900  |
|      | H | -0.04287600 | 0.90777500  | 1.56400100  |
|      | H | -0.35375500 | -0.75946500 | 1.98028700  |
|      | C | 0.09963000  | -1.53339200 | -0.79448400 |
|      | H | -0.03219100 | -2.41093000 | -0.16105200 |
|      | H | -0.39666100 | -1.71679600 | -1.74477900 |
|      | C | -0.53160800 | -0.33990300 | -0.09745200 |
|      | C | -2.08619500 | -0.52896800 | 0.12621900  |
|      | C | -2.63590600 | 0.58894400  | 0.98513300  |
|      | H | -3.71918700 | 0.51264500  | 1.02324300  |
|      | H | -2.26209900 | 0.50954900  | 2.00108000  |
|      | H | -2.35548900 | 1.55624300  | 0.57827500  |
|      | C | -2.83044500 | -0.59141300 | -1.19307900 |
|      | H | -2.48995400 | -1.41744400 | -1.81461500 |
|      | H | -3.89016000 | -0.73126000 | -0.99490700 |
|      | H | -2.69450200 | 0.32783500  | -1.75578700 |
|      | O | -2.28369700 | -1.71735900 | 0.85405100  |
|      | H | -2.22289400 | -2.46550800 | 0.26267200  |
|      | C | 3.76474000  | -1.13582100 | 0.27480900  |
|      | H | 4.19605800  | -0.79345000 | 1.21128200  |
|      | H | 4.01683100  | -2.18837500 | 0.14562200  |
|      | H | 4.24843200  | -0.59498100 | -0.53917900 |

|      |   |             |             |             |
|------|---|-------------|-------------|-------------|
|      | O | -0.51109300 | 0.79040500  | -0.91530000 |
|      | O | 1.06337000  | 1.63434800  | -0.83280300 |
|      | N | 1.00216100  | 2.71788000  | -0.26877500 |
|      | O | 0.05990200  | 3.17235700  | 0.27453500  |
| TS33 | C | -1.86357000 | -1.24219000 | 0.03478600  |
|      | H | -1.98777400 | -1.60565700 | 1.05716400  |
|      | H | -2.36713000 | -1.96443900 | -0.60933600 |
|      | C | -2.52098300 | 0.09714900  | -0.09797400 |
|      | C | -1.80965600 | 1.22046700  | -0.09916900 |
|      | H | -2.32646000 | 2.16706400  | -0.19881600 |
|      | C | -0.32052600 | 1.29180800  | 0.05324600  |
|      | H | -0.06000100 | 2.02621300  | 0.81321900  |
|      | H | 0.12916300  | 1.60879200  | -0.88920500 |
|      | C | -0.37961500 | -1.19060700 | -0.30096800 |
|      | H | -0.26812500 | -1.01035900 | -1.37137200 |
|      | H | 0.09744900  | -2.12982300 | -0.03519200 |
|      | C | 0.22583800  | -0.05302900 | 0.49259300  |
|      | C | 2.12697600  | 0.04055700  | -0.26818200 |
|      | C | 2.68035500  | 1.25123600  | 0.39764700  |
|      | H | 3.74660200  | 1.32760400  | 0.18006500  |
|      | H | 2.19867500  | 2.15054200  | 0.02790500  |
|      | H | 2.53619900  | 1.17861600  | 1.47034300  |
|      | C | 2.72178300  | -1.26916100 | 0.12746000  |
|      | H | 2.27622900  | -2.09890100 | -0.41783100 |
|      | H | 3.79161700  | -1.26171200 | -0.08725300 |
|      | H | 2.56956800  | -1.43589800 | 1.18838500  |
|      | O | 1.98840700  | 0.23978200  | -1.60407900 |
|      | H | 1.82284900  | -0.59323100 | -2.04465500 |
|      | C | -4.00959200 | 0.09419900  | -0.20006500 |
|      | H | -4.41070500 | 1.10235600  | -0.25292200 |
|      | H | -4.34094200 | -0.45288000 | -1.08285400 |
|      | H | -4.45432000 | -0.40258500 | 0.66259200  |
|      | O | 0.50422300  | -0.24581600 | 1.69826900  |
| IM1  | C | 1.51519200  | 1.33421400  | -0.08968100 |
|      | H | 1.62615800  | 1.85092900  | 0.86234500  |
|      | H | 2.04088600  | 1.92198400  | -0.83974400 |
|      | C | 2.20987800  | -0.02183200 | 0.06775100  |
|      | C | 1.47656400  | -1.06928900 | -0.68895300 |
|      | H | 2.02158500  | -1.79306600 | -1.27933100 |
|      | C | 0.01923800  | -1.23276700 | -0.46946400 |
|      | H | -0.17059300 | -2.12035100 | 0.14248000  |
|      | H | -0.48378200 | -1.41847800 | -1.42352900 |
|      | C | 0.04467300  | 1.21788000  | -0.46960000 |
|      | H | -0.03670700 | 1.10973000  | -1.55399800 |
|      | H | -0.46203000 | 2.14334700  | -0.20232500 |
|      | C | -0.60673900 | 0.00195700  | 0.17485800  |

|     |   |             |             |             |
|-----|---|-------------|-------------|-------------|
|     | H | -0.35778300 | 0.00618800  | 1.23705300  |
|     | C | -2.13969300 | -0.00150500 | 0.05690600  |
|     | C | -2.72130000 | -1.32455200 | 0.50933900  |
|     | H | -3.80681500 | -1.27129200 | 0.50560600  |
|     | H | -2.42449100 | -2.12299600 | -0.16377900 |
|     | H | -2.38621100 | -1.56903200 | 1.51505400  |
|     | C | -2.75655500 | 1.12213900  | 0.87297100  |
|     | H | -2.41988200 | 2.10178800  | 0.53970200  |
|     | H | -3.83889200 | 1.09114200  | 0.77599000  |
|     | H | -2.50001100 | 1.02335500  | 1.92550100  |
|     | O | -2.53157800 | 0.12361400  | -1.30093700 |
|     | H | -2.30634800 | 0.99971800  | -1.60919200 |
|     | C | 3.66953500  | 0.05910000  | -0.32445400 |
|     | H | 4.17498900  | -0.88670400 | -0.13309900 |
|     | H | 3.77338700  | 0.28791400  | -1.38274400 |
|     | H | 4.16714200  | 0.83445400  | 0.25266100  |
|     | O | 2.11625900  | -0.31155500 | 1.47286400  |
|     | H | 2.44717600  | -1.19717700 | 1.61789800  |
| IM2 | C | 1.48649600  | -1.40442900 | -0.47004600 |
|     | H | 1.57864300  | -1.23992100 | -1.55250100 |
|     | H | 1.92076700  | -2.38568100 | -0.27746000 |
|     | C | 2.24943300  | -0.35343700 | 0.24821900  |
|     | C | 1.63226500  | 0.99920400  | 0.29499900  |
|     | H | 2.14829400  | 1.61660000  | 1.03495700  |
|     | C | 0.15593900  | 0.95982600  | 0.62383500  |
|     | H | -0.22329400 | 1.97155000  | 0.50800800  |
|     | H | 0.02223000  | 0.67310400  | 1.66710100  |
|     | C | 0.00863500  | -1.39836700 | -0.10803400 |
|     | H | -0.09336900 | -1.71963200 | 0.93173800  |
|     | H | -0.50625500 | -2.13003800 | -0.72740100 |
|     | C | -0.60689100 | -0.01389400 | -0.26129900 |
|     | H | -0.47961300 | 0.30428500  | -1.29915100 |
|     | C | -2.11968600 | -0.00445800 | 0.03208800  |
|     | C | -2.68895800 | 1.39854200  | -0.02648800 |
|     | H | -3.77340700 | 1.35776400  | 0.03202800  |
|     | H | -2.33548900 | 1.99165700  | 0.81051600  |
|     | H | -2.40610000 | 1.89391400  | -0.95266800 |
|     | C | -2.87505800 | -0.88816000 | -0.94745400 |
|     | H | -2.58250200 | -1.93291100 | -0.86578400 |
|     | H | -3.94137900 | -0.82616200 | -0.74567100 |
|     | H | -2.69844100 | -0.57168300 | -1.97344100 |
|     | O | -2.37052900 | -0.44416000 | 1.35786700  |
|     | H | -2.19199600 | -1.38091600 | 1.41408500  |
|     | C | 3.71439900  | -0.50334500 | 0.42069300  |
|     | H | 4.12172400  | 0.25064000  | 1.09191100  |
|     | H | 3.96969400  | -1.48522200 | 0.81783200  |



|       |   |             |             |             |
|-------|---|-------------|-------------|-------------|
|       | H | 4.25310600  | -0.41603400 | -0.53171900 |
|       | O | 1.72470600  | 1.63972600  | -0.98218100 |
|       | H | 2.64452700  | 1.71526400  | -1.22694000 |
| IM013 | C | 1.40487000  | 0.27978700  | -1.18638900 |
|       | H | 1.71024900  | 1.28305500  | -0.87069000 |
|       | H | 1.84702700  | 0.14074600  | -2.17446100 |
|       | C | 1.98692700  | -0.72679100 | -0.24489600 |
|       | C | 1.21745300  | -1.38574300 | 0.61677100  |
|       | H | 1.67452100  | -2.12683100 | 1.26147400  |
|       | C | -0.24996300 | -1.16030200 | 0.78951100  |
|       | H | -0.46504000 | -1.12123300 | 1.85683400  |
|       | H | -0.82063700 | -2.00764700 | 0.39938100  |
|       | C | -0.10531700 | 0.17694100  | -1.27564700 |
|       | H | -0.35749900 | -0.73985700 | -1.81418600 |
|       | H | -0.48843800 | 1.01212500  | -1.85804800 |
|       | C | -0.73243900 | 0.11297500  | 0.11001400  |
|       | H | -0.36102600 | 0.96709100  | 0.68536000  |
|       | C | -2.26943100 | 0.21551800  | 0.09476800  |
|       | C | -2.84801200 | -0.02260000 | 1.47421600  |
|       | H | -3.92074500 | 0.15032500  | 1.45799600  |
|       | H | -2.68136000 | -1.04828800 | 1.78786400  |
|       | H | -2.39772700 | 0.64717200  | 2.20387000  |
|       | C | -2.73592900 | 1.57060500  | -0.41254300 |
|       | H | -2.40969700 | 1.76468400  | -1.43128900 |
|       | H | -3.82225000 | 1.60687600  | -0.40024000 |
|       | H | -2.35717300 | 2.37304700  | 0.21722000  |
|       | O | -2.82146100 | -0.81191200 | -0.71084500 |
|       | H | -2.59739900 | -0.64563400 | -1.62473000 |
|       | C | 3.46715300  | -0.90179300 | -0.32095200 |
|       | H | 3.92371000  | 0.06297700  | -0.11491000 |
|       | H | 3.82935500  | -1.62289400 | 0.40700600  |
|       | H | 3.78919100  | -1.21391100 | -1.31336100 |
|       | O | 3.82729100  | 2.04302300  | 0.96330900  |
|       | H | 3.04642400  | 1.71772900  | 1.43607700  |
| IM3   | C | 1.78709900  | -1.25735400 | -0.18683500 |
|       | H | 1.76739500  | -1.55992400 | -1.23552600 |
|       | H | 2.33578500  | -2.03207900 | 0.34597400  |
|       | C | 2.52126000  | 0.05087200  | -0.06271600 |
|       | C | 1.78711300  | 1.21410200  | 0.05322900  |
|       | H | 2.32644500  | 2.14539700  | 0.16683700  |
|       | C | 0.30208900  | 1.28886200  | 0.05546700  |
|       | H | -0.01023200 | 2.09522900  | -0.60918200 |
|       | H | -0.05145200 | 1.57642800  | 1.05202200  |
|       | C | 0.36698400  | -1.16122200 | 0.33431300  |
|       | H | 0.39811800  | -0.98344800 | 1.41210600  |
|       | H | -0.13696600 | -2.11265800 | 0.17416800  |

|      |   |             |             |             |
|------|---|-------------|-------------|-------------|
|      | C | -0.37620900 | -0.01566300 | -0.33603400 |
|      | H | -0.28057700 | -0.14535400 | -1.41820100 |
|      | C | 3.90263800  | 0.06234300  | -0.06238900 |
|      | H | 4.45000100  | 0.98956100  | 0.00823100  |
|      | H | 4.47182300  | -0.85114900 | -0.13486400 |
|      | C | -1.88313400 | -0.00299200 | -0.02051400 |
|      | C | -2.57752500 | -1.22293300 | -0.60295500 |
|      | H | -2.19018200 | -2.15108200 | -0.18771200 |
|      | H | -3.64042700 | -1.17752200 | -0.38029000 |
|      | H | -2.45232300 | -1.26366100 | -1.68299800 |
|      | C | -2.54605800 | 1.25063900  | -0.55188300 |
|      | H | -3.62030900 | 1.19180700  | -0.39862500 |
|      | H | -2.18200600 | 2.12818500  | -0.02670600 |
|      | H | -2.35101500 | 1.37087600  | -1.61549900 |
|      | O | -2.09114600 | 0.04099100  | 1.38104600  |
|      | H | -1.81045100 | -0.78845800 | 1.76380600  |
| IMO4 | C | 0.86490126  | -2.01066052 | -0.04081404 |
|      | H | 0.77020526  | -2.47615452 | -1.02520704 |
|      | H | 1.20650826  | -2.79949752 | 0.63095596  |
|      | C | 1.91539126  | -0.93748552 | -0.10642804 |
|      | C | 1.53360026  | 0.32797348  | -0.08210104 |
|      | H | 2.32698626  | 1.08643048  | -0.15477504 |
|      | C | 0.15438226  | 0.87273248  | -0.04035504 |
|      | H | 0.07027026  | 1.68071348  | -0.76496204 |
|      | H | -0.06181474 | 1.30763248  | 0.93831996  |
|      | C | -0.47476974 | -1.47448052 | 0.42360696  |
|      | H | -0.40045474 | -1.22801952 | 1.48523296  |
|      | H | -1.22580474 | -2.25585652 | 0.32245496  |
|      | C | -0.87091374 | -0.21878452 | -0.34034704 |
|      | H | -0.82307674 | -0.44365052 | -1.40942604 |
|      | C | -2.30743174 | 0.24465948  | -0.03573004 |
|      | C | -2.59079674 | 1.60027248  | -0.64817504 |
|      | H | -3.63553374 | 1.85926548  | -0.49942704 |
|      | H | -1.98636974 | 2.36839148  | -0.17577804 |
|      | H | -2.38082074 | 1.59520048  | -1.71565104 |
|      | C | -3.32745174 | -0.76012952 | -0.54590104 |
|      | H | -3.21639974 | -1.73334352 | -0.07200204 |
|      | H | -4.33033174 | -0.39937852 | -0.33271604 |
|      | H | -3.23269374 | -0.90009252 | -1.62059904 |
|      | O | -2.47458974 | 0.43099148  | 1.35903896  |
|      | H | -2.45653174 | -0.42087752 | 1.79160496  |
|      | C | 3.33709926  | -1.37615052 | -0.20540004 |
|      | H | 4.00724526  | -0.52702352 | -0.29280904 |
|      | H | 3.62204326  | -1.95985452 | 0.66979096  |
|      | H | 3.47700026  | -2.02044452 | -1.07330604 |
|      | O | 3.84960174  | 2.48594352  | 0.06749804  |

|      |              |              |              |              |
|------|--------------|--------------|--------------|--------------|
|      | H            | 3. 80706474  | 2. 59318652  | 1. 02344004  |
| IM4  | C            | 1. 80054000  | -1. 20714500 | -0. 12083000 |
|      | H            | 1. 86407100  | -1. 58025600 | -1. 14651700 |
|      | H            | 2. 34744200  | -1. 92228500 | 0. 49588400  |
|      | C            | 2. 47936800  | 0. 13967600  | -0. 04028100 |
|      | C            | 1. 70783100  | 1. 19152600  | 0. 10171300  |
|      | C            | 0. 24684600  | 1. 33340800  | 0. 13561000  |
|      | H            | -0. 06404000 | 2. 14827200  | -0. 51657500 |
|      | H            | -0. 10186800 | 1. 57907900  | 1. 14046100  |
|      | C            | 0. 35202800  | -1. 13935600 | 0. 33047400  |
|      | H            | 0. 33641900  | -0. 99800400 | 1. 41359700  |
|      | H            | -0. 13169400 | -2. 09132700 | 0. 11906600  |
|      | C            | -0. 39897700 | 0. 01623000  | -0. 31968900 |
|      | H            | -0. 27155900 | -0. 06277600 | -1. 40267400 |
|      | C            | 3. 96918500  | 0. 17051400  | -0. 12907100 |
|      | H            | 4. 30902100  | -0. 29146800 | -1. 05616700 |
|      | H            | 4. 34583800  | 1. 18747200  | -0. 09522400 |
|      | H            | 4. 41802300  | -0. 39127900 | 0. 69001200  |
|      | C            | -1. 91209900 | -0. 00565200 | -0. 03593300 |
|      | C            | -2. 57289000 | -1. 21761300 | -0. 67245800 |
|      | H            | -2. 18036700 | -2. 15198300 | -0. 27662500 |
| H    | -3. 64125600 | -1. 19472100 | -0. 47346900 |              |
| H    | -2. 42225100 | -1. 22260400 | -1. 74990100 |              |
| C    | -2. 58335000 | 1. 25374400  | -0. 54251100 |              |
| H    | -3. 65976300 | 1. 17201600  | -0. 41800300 |              |
| H    | -2. 24801000 | 2. 11945300  | 0. 02013400  |              |
| H    | -2. 36494400 | 1. 41252400  | -1. 59646400 |              |
| O    | -2. 14946200 | -0. 00945000 | 1. 36089700  |              |
| H    | -1. 87025400 | -0. 84850400 | 1. 72314300  |              |
| IM05 | C            | 1. 76951600  | -1. 34770300 | -0. 68992900 |
|      | H            | 1. 82305100  | -1. 14308900 | -1. 76292100 |
|      | H            | 2. 32534200  | -2. 27480800 | -0. 54116400 |
|      | C            | 2. 44554200  | -0. 24270500 | 0. 06096300  |
|      | C            | 1. 73012000  | 0. 66794100  | 0. 71610900  |
|      | H            | 2. 25040900  | 1. 43035500  | 1. 28427400  |
|      | C            | 0. 24191600  | 0. 70532700  | 0. 75542900  |
|      | H            | -0. 09918200 | 1. 73520100  | 0. 60130700  |
|      | H            | -0. 11563800 | 0. 45418500  | 1. 75823100  |
|      | C            | 0. 32598500  | -1. 53758800 | -0. 26442300 |
|      | H            | 0. 31579600  | -1. 96090700 | 0. 74314700  |
|      | H            | -0. 14916600 | -2. 25936000 | -0. 92545800 |
|      | C            | -0. 42689600 | -0. 21545700 | -0. 25056100 |
|      | H            | -0. 34484700 | 0. 23140400  | -1. 24580500 |
|      | C            | -1. 92900100 | -0. 36427100 | 0. 05612400  |
|      | C            | -2. 60745000 | 0. 98910800  | 0. 11007800  |
|      | H            | -3. 67918000 | 0. 85619700  | 0. 23251800  |

|      |   |             |             |             |
|------|---|-------------|-------------|-------------|
|      | H | -2.24662700 | 1.57000600  | 0.95278900  |
|      | H | -2.41961300 | 1.55563900  | -0.79861500 |
|      | C | -2.63030700 | -1.23810100 | -0.96933100 |
|      | H | -2.26045700 | -2.26152300 | -0.95699400 |
|      | H | -3.69492300 | -1.26871300 | -0.75237200 |
|      | H | -2.49494400 | -0.84570400 | -1.97521000 |
|      | O | -2.10450600 | -0.91851300 | 1.35036300  |
|      | H | -1.85455000 | -1.84052500 | 1.33226800  |
|      | C | 3.93695600  | -0.24591700 | 0.05773600  |
|      | H | 4.34277300  | 0.60620300  | 0.59586800  |
|      | H | 4.32188100  | -1.15537100 | 0.51946600  |
|      | H | 4.32674700  | -0.22370100 | -0.96032300 |
|      | O | -0.17399500 | 3.47616900  | -0.68180500 |
|      | H | 0.74285500  | 3.30946100  | -0.94263000 |
| IM5  | C | -1.77239600 | 1.21682500  | -0.29039300 |
|      | H | -1.83368700 | 1.44799600  | -1.35995600 |
|      | H | -2.31903500 | 2.01564000  | 0.21309900  |
|      | C | -2.43187000 | -0.09433300 | -0.02721100 |
|      | C | -1.64457300 | -1.22533900 | 0.06541100  |
|      | H | -2.12558900 | -2.17020500 | 0.28314800  |
|      | C | -0.27897500 | -1.21219400 | -0.12196100 |
|      | H | 0.27799800  | -2.12906100 | -0.01624100 |
|      | C | -0.31632400 | 1.23252100  | 0.14554800  |
|      | H | -0.28198100 | 1.19050800  | 1.23781000  |
|      | H | 0.14180900  | 2.17228700  | -0.15302100 |
|      | C | 0.45523900  | 0.05051500  | -0.43235800 |
|      | H | 0.48483200  | 0.18898400  | -1.52097600 |
|      | C | -3.91080200 | -0.12841700 | 0.09313100  |
|      | H | -4.38920400 | 0.26060100  | -0.80845900 |
|      | H | -4.27914000 | -1.13746100 | 0.25737900  |
|      | H | -4.25728500 | 0.49790500  | 0.91766500  |
|      | C | 1.92681500  | -0.02792200 | 0.02524300  |
|      | C | 2.69731800  | -1.00772500 | -0.83557500 |
|      | H | 3.70532700  | -1.11751600 | -0.44434600 |
|      | H | 2.23116600  | -1.98837000 | -0.83855400 |
|      | H | 2.75821300  | -0.64943100 | -1.86045700 |
|      | C | 2.60540900  | 1.32989000  | -0.02777100 |
|      | H | 2.18841100  | 2.01006000  | 0.71163900  |
|      | H | 3.66446400  | 1.21449700  | 0.18742500  |
|      | H | 2.49833400  | 1.78892400  | -1.00942100 |
|      | O | 2.01323200  | -0.54551700 | 1.33998100  |
|      | H | 1.45046200  | -0.03414400 | 1.91903000  |
| IM06 | C | -1.58157100 | -0.97593900 | 0.94375900  |
|      | H | -1.70529000 | -0.32570300 | 1.81464100  |
|      | H | -2.06756800 | -1.91715600 | 1.20415600  |
|      | C | -2.28860200 | -0.36925300 | -0.22932600 |

|     |   |             |             |             |
|-----|---|-------------|-------------|-------------|
|     | C | -1.60189000 | 0.20835800  | -1.21549800 |
|     | H | -2.14579800 | 0.60634100  | -2.06396000 |
|     | C | -0.11487800 | 0.36014400  | -1.24079500 |
|     | H | 0.12580900  | 1.37845900  | -1.54505800 |
|     | H | 0.31426200  | -0.29295700 | -2.00563600 |
|     | C | -0.10898200 | -1.20531100 | 0.66767600  |
|     | H | -0.01118200 | -2.01481500 | -0.05938700 |
|     | H | 0.38080500  | -1.52772900 | 1.58429700  |
|     | C | 0.53925100  | 0.04595300  | 0.09692600  |
|     | H | 0.33786600  | 0.87357200  | 0.78736500  |
|     | C | 2.07095100  | -0.06047100 | -0.02438200 |
|     | C | 2.64497100  | 1.12874500  | -0.76631000 |
|     | H | 3.73061600  | 1.08693800  | -0.74340600 |
|     | H | 2.33491000  | 1.11824000  | -1.80655600 |
|     | H | 2.32049500  | 2.06194200  | -0.31103500 |
|     | C | 2.72809700  | -0.16278600 | 1.34154400  |
|     | H | 2.41081600  | -1.05071500 | 1.88465200  |
|     | H | 3.80721600  | -0.21483400 | 1.22199700  |
|     | H | 2.48974400  | 0.70463600  | 1.95317400  |
|     | O | 2.41970100  | -1.18760500 | -0.81082600 |
|     | H | 2.23980900  | -1.98313100 | -0.31306600 |
|     | C | -3.77784800 | -0.46100300 | -0.22905100 |
|     | H | -4.21448700 | 0.04185200  | -1.08736600 |
|     | H | -4.09943000 | -1.50226000 | -0.24276400 |
|     | H | -4.19399400 | -0.01810200 | 0.67616300  |
|     | O | -1.34032000 | 2.44338700  | 1.12806700  |
|     | H | -1.74665300 | 1.87854400  | 0.44660100  |
| IM6 | C | -1.68688200 | -1.23416800 | 0.11322500  |
|     | H | -1.59510100 | -1.56602600 | 1.15010500  |
|     | H | -2.27664100 | -1.99750000 | -0.39651900 |
|     | C | -2.42029700 | 0.07126600  | 0.07250000  |
|     | C | -1.76911000 | 1.21967000  | -0.08190300 |
|     | H | -2.33523500 | 2.14181000  | -0.12144200 |
|     | C | -0.28330800 | 1.35251000  | -0.17004200 |
|     | H | 0.05453400  | 2.05968800  | 0.59008000  |
|     | H | -0.02090800 | 1.83144700  | -1.12572700 |
|     | C | -0.31115900 | -1.13103500 | -0.52649000 |
|     | H | -0.45289400 | -1.04527800 | -1.61215200 |
|     | H | 0.24424000  | -2.05389600 | -0.36003100 |
|     | C | 0.43472900  | 0.05894200  | -0.03923200 |
|     | C | 1.93358400  | -0.00871100 | 0.06311400  |
|     | C | 2.56590900  | 1.33186800  | 0.36511200  |
|     | H | 3.64615900  | 1.21851900  | 0.38657700  |
|     | H | 2.31831300  | 2.05801300  | -0.40387500 |
|     | H | 2.23687300  | 1.71122500  | 1.32912900  |
|     | C | 2.37220500  | -1.02454000 | 1.10861400  |

|      |   |              |              |              |
|------|---|--------------|--------------|--------------|
|      | H | 1. 97598500  | -2. 01591800 | 0. 89803400  |
|      | H | 3. 45777600  | -1. 09135000 | 1. 11662500  |
|      | H | 2. 02985700  | -0. 73286600 | 2. 09861800  |
|      | O | 2. 48171900  | -0. 38151000 | -1. 20480900 |
|      | H | 2. 15199800  | -1. 24756400 | -1. 43962600 |
|      | C | -3. 90348000 | 0. 00577400  | 0. 21959000  |
|      | H | -4. 35162800 | 0. 99548500  | 0. 21678400  |
|      | H | -4. 35134000 | -0. 57500400 | -0. 58692100 |
|      | H | -4. 17888800 | -0. 48816100 | 1. 15188600  |
| IM07 | C | 1. 78942451  | 1. 05434100  | 0. 33053872  |
|      | H | 1. 80081351  | 1. 29476800  | 1. 39686672  |
|      | H | 2. 20939351  | 1. 92606300  | -0. 17511228 |
|      | C | 2. 66906851  | -0. 13111500 | 0. 07900572  |
|      | C | 2. 15330751  | -1. 31100600 | -0. 25526128 |
|      | H | 2. 83012751  | -2. 13361500 | -0. 45078628 |
|      | C | 0. 68949251  | -1. 60403100 | -0. 36338528 |
|      | H | 0. 49044451  | -2. 58272900 | 0. 07215672  |
|      | H | 0. 39351851  | -1. 67401100 | -1. 41394628 |
|      | C | 0. 37892151  | 0. 80004800  | -0. 13882928 |
|      | H | 0. 32546751  | 0. 83393000  | -1. 22660628 |
|      | H | -0. 27354949 | 1. 60886400  | 0. 24891372  |
|      | C | -0. 14772749 | -0. 54059500 | 0. 33007072  |
|      | H | 0. 04475051  | -0. 62328800 | 1. 40354472  |
|      | C | -1. 67472349 | -0. 67080300 | 0. 12892872  |
|      | C | -2. 11597649 | -2. 11617200 | 0. 05250372  |
|      | H | -3. 20081549 | -2. 16166500 | 0. 00641872  |
|      | H | -1. 72162149 | -2. 59156900 | -0. 84097428 |
|      | H | -1. 78072049 | -2. 67468200 | 0. 92415372  |
|      | C | -2. 40038449 | 0. 01717400  | 1. 27490072  |
|      | H | -2. 08567849 | 1. 05176100  | 1. 38965272  |
|      | H | -3. 47109249 | 0. 00816300  | 1. 08472372  |
|      | H | -2. 21286349 | -0. 50083500 | 2. 21305172  |
|      | O | -2. 06481649 | -0. 09270300 | -1. 10184928 |
|      | H | -2. 06056949 | 0. 86165100  | -1. 00224628 |
|      | C | 4. 13439251  | 0. 10775900  | 0. 22066572  |
|      | H | 4. 36955751  | 0. 49113000  | 1. 21396572  |
|      | H | 4. 70854051  | -0. 80099100 | 0. 06378072  |
|      | H | 4. 47820651  | 0. 85644900  | -0. 49340728 |
|      | O | -1. 73970551 | 3. 04790600  | -0. 29827972 |
|      | H | -1. 16060151 | 3. 54632900  | -0. 89062572 |
| IM7  | C | 1. 75641200  | -1. 26489500 | 0. 01220300  |
|      | H | 2. 03041300  | -1. 82669300 | -0. 89357100 |
|      | H | 2. 17154000  | -1. 85824900 | 0. 83180600  |
|      | C | 2. 43675200  | 0. 06747300  | -0. 02534100 |
|      | C | 1. 74073700  | 1. 19762200  | 0. 02573700  |
|      | H | 2. 27961800  | 2. 13698000  | 0. 02636000  |

|      |   |             |             |             |
|------|---|-------------|-------------|-------------|
|      | C | 0.25203000  | 1.28329400  | 0.08520100  |
|      | H | -0.07580200 | 2.11908600  | -0.53110300 |
|      | H | -0.07208400 | 1.51112700  | 1.10358400  |
|      | C | 0.28387400  | -1.18293600 | 0.13778000  |
|      | H | -0.24868700 | -2.10206300 | 0.33938400  |
|      | C | -0.44312700 | 0.00538000  | -0.37858900 |
|      | H | -0.38788800 | -0.01071200 | -1.47773700 |
|      | C | 3.92635100  | 0.04013200  | -0.10010000 |
|      | H | 4.26358400  | -0.48936800 | -0.99162500 |
|      | H | 4.34295400  | 1.04300600  | -0.12475300 |
|      | H | 4.35190100  | -0.48386300 | 0.75610600  |
|      | C | -1.93762200 | -0.01774000 | -0.00805500 |
|      | C | -2.64123500 | -1.20264900 | -0.65052100 |
|      | H | -2.22054100 | -2.15213100 | -0.32897300 |
|      | H | -3.69100000 | -1.19406100 | -0.36938700 |
|      | H | -2.57166400 | -1.15532800 | -1.73569300 |
|      | C | -2.63222200 | 1.26132000  | -0.42420800 |
|      | H | -3.69372300 | 1.18856100  | -0.20260500 |
|      | H | -2.23437500 | 2.10988000  | 0.12332100  |
|      | H | -2.51197000 | 1.43916200  | -1.49085000 |
|      | O | -2.08305700 | -0.07772500 | 1.39854200  |
|      | H | -1.51952800 | -0.77554200 | 1.73275500  |
| IM08 | C | 1.61733900  | 0.25325100  | -1.01218600 |
|      | H | 1.83625100  | 1.22167700  | -0.61327600 |
|      | H | 2.15175300  | 0.26468900  | -1.96263800 |
|      | C | 2.17687700  | -0.76815200 | -0.09436300 |
|      | C | 1.37015800  | -1.45282400 | 0.71737400  |
|      | H | 1.80113600  | -2.21403600 | 1.35628900  |
|      | C | -0.10422700 | -1.25165700 | 0.82048700  |
|      | H | -0.37506400 | -1.23332200 | 1.87581500  |
|      | H | -0.62769100 | -2.11182700 | 0.39354600  |
|      | C | 0.12304700  | 0.15297000  | -1.20378500 |
|      | H | -0.08544400 | -0.72850100 | -1.81726300 |
|      | H | -0.22376400 | 1.02482900  | -1.75327200 |
|      | C | -0.59086000 | 0.01432700  | 0.13183300  |
|      | H | -0.30770200 | 0.87639200  | 0.74252500  |
|      | C | -2.12452100 | 0.04347000  | 0.00200900  |
|      | C | -2.78721600 | -0.19561100 | 1.34285300  |
|      | H | -3.86360400 | -0.08214300 | 1.24666900  |
|      | H | -2.58899200 | -1.20339500 | 1.69469800  |
|      | H | -2.42622800 | 0.51371600  | 2.08465800  |
|      | C | -2.60658800 | 1.36493000  | -0.57112300 |
|      | H | -2.25318500 | 1.52094900  | -1.58846700 |
|      | H | -3.69324000 | 1.37868900  | -0.59248700 |
|      | H | -2.26011000 | 2.20212000  | 0.03080300  |
|      | O | -2.56806300 | -1.02364500 | -0.82019300 |

|      |   |             |             |             |
|------|---|-------------|-------------|-------------|
|      | H | -2.34186800 | -0.83330700 | -1.72865700 |
|      | C | 3.65423500  | -0.97506200 | -0.13148500 |
|      | H | 4.18139700  | -0.03961500 | 0.05677500  |
|      | H | 3.97571500  | -1.70263100 | 0.60838900  |
|      | H | 3.97472200  | -1.32230500 | -1.11340800 |
|      | O | 2.13411800  | 3.11879400  | 0.75852000  |
|      | H | 2.22800500  | 2.59299000  | 1.56300900  |
| IM8  | C | 1.77376200  | -1.19592300 | 0.04285800  |
|      | H | 2.31829200  | -2.12874800 | 0.00231600  |
|      | C | 2.46089700  | -0.00064700 | -0.02335300 |
|      | C | 1.76948200  | 1.18994400  | 0.08821500  |
|      | H | 2.31720400  | 2.12211700  | 0.09332900  |
|      | C | 0.28886500  | 1.24550200  | 0.22068600  |
|      | H | -0.07769300 | 2.13147900  | -0.29496600 |
|      | H | 0.00188100  | 1.37163700  | 1.26989300  |
|      | C | 0.29596500  | -1.24745700 | 0.21451700  |
|      | H | 0.06441100  | -1.36073500 | 1.28175400  |
|      | H | -0.08925400 | -2.14037400 | -0.27470300 |
|      | C | -0.39654300 | -0.00058800 | -0.32377900 |
|      | H | -0.26922200 | -0.00520200 | -1.40950500 |
|      | C | 3.94858300  | 0.00603500  | -0.21680900 |
|      | H | 4.40598000  | 0.85928700  | 0.27731200  |
|      | H | 4.40321100  | -0.89699900 | 0.18195300  |
|      | H | 4.20326200  | 0.06372600  | -1.27369900 |
|      | C | -1.91219700 | 0.00552700  | -0.04872900 |
|      | C | -2.58372800 | -1.22319900 | -0.63838600 |
|      | H | -2.24340600 | -2.13827700 | -0.15726100 |
|      | H | -3.65962200 | -1.15551200 | -0.49910900 |
|      | H | -2.37716600 | -1.31010500 | -1.70327600 |
|      | C | -2.56241000 | 1.25431200  | -0.60871000 |
|      | H | -3.64184200 | 1.18541400  | -0.50353400 |
|      | H | -2.23330600 | 2.13447700  | -0.06560600 |
|      | H | -2.32105700 | 1.37926400  | -1.66207500 |
|      | O | -2.16656300 | 0.05952400  | 1.34531000  |
|      | H | -1.96522000 | -0.78868000 | 1.73563100  |
| IM09 | C | 1.76482600  | 1.00370200  | 0.69891100  |
|      | H | 1.84950800  | 0.89748100  | 1.78408400  |
|      | H | 2.16661200  | 1.99267800  | 0.46988700  |
|      | C | 2.60635400  | -0.03685500 | 0.02757000  |
|      | C | 2.04558600  | -1.08027400 | -0.57642200 |
|      | H | 2.68651200  | -1.79758900 | -1.07473300 |
|      | C | 0.57926600  | -1.36455300 | -0.60196000 |
|      | H | 0.42958600  | -2.42035400 | -0.37813500 |
|      | H | 0.18006900  | -1.20971100 | -1.60825100 |
|      | C | 0.31129500  | 0.92023900  | 0.27795800  |
|      | H | 0.22766100  | 1.23873900  | -0.76447100 |



|     |   |             |             |             |
|-----|---|-------------|-------------|-------------|
|     | H | -0.28231200 | 1.60269900  | 0.88565100  |
|     | C | -0.20944100 | -0.50522700 | 0.37432000  |
|     | H | -0.01028500 | -0.86558000 | 1.38831400  |
|     | C | -1.72968300 | -0.61013300 | 0.14679200  |
|     | C | -2.16905500 | -2.05903200 | 0.08050200  |
|     | H | -3.25360300 | -2.11198400 | 0.03380100  |
|     | H | -1.77503600 | -2.53718900 | -0.81102000 |
|     | H | -1.82931000 | -2.61096500 | 0.95477900  |
|     | C | -2.49856100 | 0.09692300  | 1.25112400  |
|     | H | -2.28301300 | 1.16271000  | 1.28021700  |
|     | H | -3.56625500 | -0.01927900 | 1.08182300  |
|     | H | -2.25666300 | -0.32522700 | 2.22449100  |
|     | O | -2.07413300 | -0.05674400 | -1.10880600 |
|     | H | -2.09008900 | 0.89915600  | -1.03854600 |
|     | C | 4.08314100  | 0.17076500  | 0.07307800  |
|     | H | 4.43429400  | 0.24059100  | 1.10318200  |
|     | H | 4.61787700  | -0.64154800 | -0.41141900 |
|     | H | 4.36337400  | 1.10390400  | -0.41645400 |
|     | O | -1.81596300 | 2.90941000  | -0.64036500 |
|     | H | -1.19053100 | 3.36681900  | -1.22107100 |
| IM9 | C | 1.73068800  | -1.25275600 | -0.08579700 |
|     | H | 1.79103900  | -1.65976100 | -1.09949600 |
|     | H | 2.27717700  | -1.95675200 | 0.54399800  |
|     | C | 2.41633800  | 0.07686200  | -0.04823300 |
|     | C | 1.71725000  | 1.20301200  | 0.04935900  |
|     | H | 2.25000700  | 2.14477200  | 0.09875500  |
|     | C | 0.22538100  | 1.27958200  | 0.07732300  |
|     | H | -0.09134900 | 2.08184000  | -0.58912500 |
|     | H | -0.11588800 | 1.56229100  | 1.07751300  |
|     | C | 0.28533800  | -1.17452300 | 0.36321700  |
|     | H | 0.24367200  | -1.00941900 | 1.44113300  |
|     | H | -0.20512200 | -2.12551100 | 0.16740900  |
|     | C | -0.44354300 | -0.02692300 | -0.31749500 |
|     | H | -0.35289300 | -0.15256200 | -1.40064500 |
|     | C | 3.90632700  | 0.06025700  | -0.12177500 |
|     | H | 4.24474400  | -0.44576200 | -1.02650900 |
|     | H | 4.32021700  | 1.06479400  | -0.12135900 |
|     | H | 4.33269100  | -0.48551900 | 0.72011300  |
|     | C | -1.94638300 | -0.03395200 | 0.01762400  |
|     | C | -2.66730700 | -1.24636400 | -0.56075000 |
|     | H | -2.29449600 | -2.17091100 | -0.13126200 |
|     | H | -3.72911600 | -1.18059300 | -0.34183200 |
|     | H | -2.53144100 | -1.28955300 | -1.63933900 |
|     | C | -2.64000400 | 1.23790200  | -0.50079300 |
|     | H | -3.71016800 | 1.17158700  | -0.33336000 |
|     | H | -2.26200200 | 2.12433800  | -0.00338500 |

|       |   |             |             |             |
|-------|---|-------------|-------------|-------------|
|       | H | -2.44826900 | 1.32118000  | -1.56851400 |
|       | O | -2.15291400 | 0.03336900  | 1.37122800  |
| IM010 | C | 2.00723827  | -0.73901637 | -1.00629700 |
|       | H | 1.93452727  | -0.20270237 | -1.95649400 |
|       | H | 2.68869227  | -1.57135337 | -1.19006600 |
|       | C | 2.60148427  | 0.16328563  | 0.03025000  |
|       | C | 1.85118027  | 0.67261663  | 1.00261800  |
|       | H | 2.32363127  | 1.29622063  | 1.75175300  |
|       | C | 0.37729127  | 0.46712763  | 1.13570900  |
|       | H | -0.08457573 | 1.42814663  | 1.36927100  |
|       | H | 0.15829027  | -0.17809537 | 1.99137800  |
|       | C | 0.64712527  | -1.26503737 | -0.59357800 |
|       | H | 0.78279527  | -1.97839837 | 0.22238600  |
|       | H | 0.20036427  | -1.80409237 | -1.42736100 |
|       | C | -0.25332073 | -0.13754537 | -0.10921400 |
|       | H | -0.28536873 | 0.62522463  | -0.89181800 |
|       | C | -1.70429473 | -0.59715837 | 0.12959900  |
|       | C | -2.52895973 | 0.43329863  | 0.86482100  |
|       | H | -3.55351273 | 0.08593063  | 0.96782700  |
|       | H | -2.12937673 | 0.64288763  | 1.85165900  |
|       | H | -2.59068173 | 1.37335563  | 0.29457300  |
|       | C | -2.38776273 | -0.93874237 | -1.18296500 |
|       | H | -1.87512773 | -1.73769937 | -1.71461300 |
|       | H | -3.40685473 | -1.26515237 | -0.99142800 |
|       | H | -2.41892073 | -0.06445637 | -1.82965200 |
|       | O | -1.72897273 | -1.71020337 | 1.00763400  |
|       | H | -1.38235873 | -2.47644637 | 0.55393400  |
|       | C | 4.06234827  | 0.44104463  | -0.08811200 |
|       | H | 4.29656227  | 0.87801763  | -1.05930700 |
|       | H | 4.40542827  | 1.12587063  | 0.68240800  |
|       | H | 4.64234227  | -0.47876437 | -0.01087800 |
|       | O | -2.07979927 | 2.96409237  | -0.91389700 |
|       | H | -1.28873427 | 3.21176537  | -0.41534000 |
| IM10  | C | 1.70520700  | -1.25184700 | -0.10923600 |
|       | H | 1.75705100  | -1.63862900 | -1.13102300 |
|       | H | 2.24563600  | -1.97437500 | 0.50476900  |
|       | C | 2.40391300  | 0.07118700  | -0.04373400 |
|       | C | 1.71697900  | 1.20223900  | 0.08521700  |
|       | H | 2.26136700  | 2.13595900  | 0.15663100  |
|       | C | 0.22658700  | 1.29044200  | 0.12106700  |
|       | H | -0.10082900 | 2.11505400  | -0.51233100 |
|       | H | -0.11587600 | 1.53942500  | 1.12822700  |
|       | C | 0.25977500  | -1.16719200 | 0.34364500  |
|       | H | 0.24225500  | -1.01876400 | 1.42606300  |
|       | H | -0.23782300 | -2.11248000 | 0.13494000  |
|       | C | -0.44693900 | 0.00211500  | -0.32172500 |

|       |   |             |             |             |
|-------|---|-------------|-------------|-------------|
|       | H | -0.32130300 | -0.10031100 | -1.40384200 |
|       | C | 3.89338800  | 0.03906500  | -0.12538400 |
|       | H | 4.22217300  | -0.44626400 | -1.04496600 |
|       | H | 4.31798900  | 1.03881100  | -0.10107000 |
|       | H | 4.31883900  | -0.53279900 | 0.69962700  |
|       | C | -1.96499300 | 0.04405800  | -0.05148500 |
|       | C | -2.66701800 | -1.19463700 | -0.60749900 |
|       | H | -2.32829200 | -2.10259700 | -0.11012000 |
|       | H | -3.73832400 | -1.10459500 | -0.45266300 |
|       | H | -2.47745100 | -1.30337700 | -1.67276300 |
|       | C | -2.56605200 | 1.25241900  | -0.66774900 |
|       | H | -2.38070300 | 1.47650100  | -1.70611600 |
|       | H | -3.28003400 | 1.83568200  | -0.11109200 |
|       | O | -2.22012600 | 0.14379400  | 1.33792200  |
|       | H | -1.98875900 | -0.68469500 | 1.75365000  |
| IM011 | C | -1.86413200 | 0.75208000  | 1.03262600  |
|       | H | -1.68281200 | 1.81516800  | 0.85255400  |
|       | H | -2.46656400 | 0.70538000  | 1.94147500  |
|       | C | -2.64601000 | 0.17838700  | -0.10770400 |
|       | C | -2.06398300 | -0.61563100 | -1.00080100 |
|       | H | -2.66806700 | -1.03332600 | -1.79713000 |
|       | C | -0.61157300 | -0.96319500 | -1.01528800 |
|       | H | -0.24175700 | -0.84667700 | -2.03363200 |
|       | H | -0.47313400 | -2.01889300 | -0.76531100 |
|       | C | -0.54877300 | 0.02909700  | 1.24673000  |
|       | H | -0.76507300 | -0.96634800 | 1.64429500  |
|       | H | 0.03437400  | 0.56186500  | 1.99559500  |
|       | C | 0.21567000  | -0.11355300 | -0.06073100 |
|       | H | 0.33094200  | 0.88416700  | -0.49227100 |
|       | C | 1.63639200  | -0.67605900 | 0.12563500  |
|       | C | 2.30657400  | -0.90957300 | -1.21184400 |
|       | H | 3.33591300  | -1.22478100 | -1.06005000 |
|       | H | 1.79735300  | -1.69437800 | -1.76189100 |
|       | H | 2.29967000  | 0.00394000  | -1.80252500 |
|       | C | 2.49400800  | 0.24037200  | 0.97627100  |
|       | H | 2.13733400  | 0.31729600  | 2.00091600  |
|       | H | 3.52424100  | -0.10430800 | 0.99143800  |
|       | H | 2.46060700  | 1.26405800  | 0.57040000  |
|       | O | 1.60583400  | -1.94420100 | 0.75746100  |
|       | H | 1.21596100  | -1.84763200 | 1.62473200  |
|       | C | -4.09074200 | 0.54420800  | -0.17334500 |
|       | H | -4.21473000 | 1.62658200  | -0.22160100 |
|       | H | -4.57631000 | 0.10976700  | -1.04279000 |
|       | H | -4.62101200 | 0.20814600  | 0.71806900  |
|       | O | 2.42257900  | 2.98560400  | -0.69851800 |
|       | H | 3.38117700  | 3.11195400  | -0.70311600 |

|      |   |              |              |              |
|------|---|--------------|--------------|--------------|
| IM11 | C | 1. 71980300  | -1. 24658200 | -0. 13014200 |
|      | H | 1. 77796500  | -1. 61544500 | -1. 15819400 |
|      | H | 2. 26903300  | -1. 97143700 | 0. 47304000  |
|      | C | 2. 39973300  | 0. 08504000  | -0. 04087000 |
|      | C | 1. 69779200  | 1. 20579400  | 0. 09793000  |
|      | H | 2. 23091600  | 2. 14450600  | 0. 18629300  |
|      | C | 0. 20527900  | 1. 28152800  | 0. 11727400  |
|      | H | -0. 10923900 | 2. 10379300  | -0. 52515500 |
|      | H | -0. 14924800 | 1. 53026000  | 1. 12121200  |
|      | C | 0. 27546300  | -1. 17974000 | 0. 32342800  |
|      | H | 0. 25786600  | -1. 03915700 | 1. 40659200  |
|      | H | -0. 23176200 | -2. 12073400 | 0. 10887600  |
|      | C | -0. 44791300 | -0. 01417300 | -0. 33049700 |
|      | H | -0. 32372000 | -0. 10636900 | -1. 41389000 |
|      | C | 3. 89024000  | 0. 07463700  | -0. 10898100 |
|      | H | 4. 23350100  | -0. 39463700 | -1. 03153500 |
|      | H | 4. 30132400  | 1. 07945500  | -0. 06786200 |
|      | H | 4. 31537000  | -0. 50244800 | 0. 71249200  |
|      | C | -1. 96004400 | -0. 04464900 | -0. 05352700 |
|      | C | -2. 57427900 | -1. 26240000 | -0. 64604100 |
|      | H | -3. 55429700 | -1. 56820500 | -0. 31220100 |
|      | H | -2. 16555100 | -1. 71569900 | -1. 53599400 |
|      | C | -2. 65342600 | 1. 19469600  | -0. 60156200 |
|      | H | -3. 72823400 | 1. 10061600  | -0. 47672400 |
|      | H | -2. 32496300 | 2. 07472500  | -0. 05446900 |
|      | H | -2. 43105700 | 1. 32756600  | -1. 65740100 |
|      | O | -2. 21443500 | -0. 00543100 | 1. 34279500  |
|      | H | -1. 96831300 | -0. 84825100 | 1. 72049100  |
| IM12 | C | -1. 16940300 | -1. 18589100 | -1. 12691700 |
|      | H | -1. 14014100 | -2. 27346000 | -1. 09387300 |
|      | H | -1. 75614000 | -0. 90361100 | -1. 99818400 |
|      | C | -1. 90676400 | -0. 74618700 | 0. 13557500  |
|      | C | -1. 37604000 | 0. 60708200  | 0. 58687600  |
|      | H | -1. 95648600 | 0. 99974100  | 1. 42055200  |
|      | C | 0. 10060800  | 0. 56918200  | 0. 92378100  |
|      | H | 0. 19745100  | 0. 35857500  | 1. 98533500  |
|      | H | 0. 50032200  | 1. 56922200  | 0. 75510600  |
|      | C | 0. 24128500  | -0. 61696700 | -1. 25266800 |
|      | H | 0. 19372500  | 0. 35465200  | -1. 74718500 |
|      | H | 0. 82295900  | -1. 27431300 | -1. 89418000 |
|      | C | 0. 89601800  | -0. 45146600 | 0. 11049800  |
|      | H | 0. 84389600  | -1. 41468500 | 0. 61982900  |
|      | C | 2. 38155100  | -0. 05678200 | 0. 04039500  |
|      | C | 2. 94583800  | 0. 14071400  | 1. 43238400  |
|      | H | 4. 00579200  | 0. 37192300  | 1. 37023800  |
|      | H | 2. 45361100  | 0. 96863500  | 1. 93359100  |

|      |   |             |             |             |
|------|---|-------------|-------------|-------------|
|      | H | 2.81780900  | -0.75890100 | 2.03039400  |
|      | C | 3.20227900  | -1.10349600 | -0.69358600 |
|      | H | 2.92155300  | -1.17574600 | -1.74228900 |
|      | H | 4.25509200  | -0.83666400 | -0.65180400 |
|      | H | 3.07562200  | -2.08655900 | -0.24448400 |
|      | O | 2.53202300  | 1.19969600  | -0.59600800 |
|      | H | 2.27931100  | 1.11966700  | -1.51413900 |
|      | C | -3.40310100 | -0.72403400 | -0.08086100 |
|      | H | -3.92657100 | -0.49004600 | 0.84661900  |
|      | H | -3.67342500 | 0.02888100  | -0.81607600 |
|      | H | -3.74104500 | -1.69614500 | -0.43138200 |
|      | O | -1.57025500 | -1.67873600 | 1.14793900  |
|      | O | -1.51355500 | 2.74152600  | -0.17869300 |
|      | O | -1.63435800 | 1.50076100  | -0.51993400 |
|      | H | -2.15780200 | -1.56006100 | 1.89264900  |
| IM13 | C | 0.24972800  | 1.77662500  | -1.08850900 |
|      | H | -0.11161100 | 2.79963500  | -1.00026500 |
|      | H | 0.87286500  | 1.72753400  | -1.97878100 |
|      | C | 1.11950800  | 1.52947700  | 0.14136800  |
|      | C | 1.05538400  | 0.05104200  | 0.51654000  |
|      | H | 1.74788800  | -0.14870800 | 1.33581300  |
|      | C | -0.35161200 | -0.38769200 | 0.87621600  |
|      | H | -0.48021200 | -0.27371000 | 1.94939600  |
|      | H | -0.43894500 | -1.45052100 | 0.65072900  |
|      | C | -0.91777400 | 0.80418600  | -1.22575100 |
|      | H | -0.57905900 | -0.07946400 | -1.76843700 |
|      | H | -1.69266900 | 1.27653200  | -1.82452500 |
|      | C | -1.44822200 | 0.37660400  | 0.13441100  |
|      | H | -1.68062300 | 1.28136900  | 0.69798100  |
|      | C | -2.74162400 | -0.45281600 | 0.05677400  |
|      | C | -3.17475100 | -0.89941900 | 1.43808900  |
|      | H | -4.11160100 | -1.44593800 | 1.37026000  |
|      | H | -2.43492300 | -1.56019600 | 1.87960100  |
|      | H | -3.31600000 | -0.04229000 | 2.09281300  |
|      | C | -3.86809000 | 0.33175100  | -0.59483300 |
|      | H | -3.65955500 | 0.54792700  | -1.64049600 |
|      | H | -4.78664900 | -0.24803600 | -0.55553800 |
|      | H | -4.03344800 | 1.27828400  | -0.08403800 |
|      | O | -2.51980900 | -1.65374400 | -0.66134300 |
|      | H | -2.32157800 | -1.44199300 | -1.57187200 |
|      | C | 2.54027400  | 1.99614200  | -0.07854200 |
|      | H | 3.12981100  | 1.88198800  | 0.83169500  |
|      | H | 3.02076100  | 1.41005900  | -0.85592600 |
|      | H | 2.54419200  | 3.04504700  | -0.36515600 |
|      | O | 0.52571500  | 2.24548900  | 1.20966300  |
|      | O | 1.77922200  | -1.96257600 | -0.32652600 |

|      |   |              |              |              |
|------|---|--------------|--------------|--------------|
|      | O | 1. 55387300  | -0. 62379700 | -0. 64435100 |
|      | H | 1. 14627200  | 2. 29574000  | 1. 93506300  |
|      | N | 3. 07876900  | -2. 20959400 | 0. 04859200  |
|      | O | 3. 76809600  | -1. 27306000 | 0. 11092700  |
| IM14 | C | 1. 35758800  | 1. 28724900  | -0. 63726700 |
|      | H | 1. 42320900  | 2. 24249700  | -0. 11874700 |
|      | H | 1. 91604600  | 1. 38019700  | -1. 56635000 |
|      | C | 2. 06295200  | 0. 27476000  | 0. 25229200  |
|      | C | 1. 42021800  | -1. 14453900 | 0. 01651800  |
|      | H | 1. 99501100  | -1. 83602100 | 0. 64888300  |
|      | C | -0. 04880900 | -1. 11683600 | 0. 43337100  |
|      | H | -0. 10272400 | -1. 40594600 | 1. 48067500  |
|      | H | -0. 56368800 | -1. 88216700 | -0. 14659800 |
|      | C | -0. 09550900 | 0. 94420900  | -0. 94682400 |
|      | H | -0. 12588200 | 0. 30477500  | -1. 82949000 |
|      | H | -0. 62323400 | 1. 86336700  | -1. 18973300 |
|      | C | -0. 75037100 | 0. 22328700  | 0. 22085500  |
|      | H | -0. 60248800 | 0. 83805400  | 1. 10980500  |
|      | C | -2. 26853300 | 0. 03098900  | 0. 05837600  |
|      | C | -2. 83723900 | -0. 71760200 | 1. 24628300  |
|      | H | -3. 91388400 | -0. 81794000 | 1. 13734700  |
|      | H | -2. 41320600 | -1. 71518000 | 1. 30982000  |
|      | H | -2. 62667500 | -0. 18652900 | 2. 17200100  |
|      | C | -2. 98744500 | 1. 36125500  | -0. 09168400 |
|      | H | -2. 72229300 | 1. 86211300  | -1. 02026400 |
|      | H | -4. 06166500 | 1. 19598000  | -0. 10287700 |
|      | H | -2. 74818100 | 2. 03212300  | 0. 73116600  |
|      | O | -2. 55361100 | -0. 79137100 | -1. 05957100 |
|      | H | -2. 26630500 | -0. 34918100 | -1. 85658100 |
|      | C | 3. 55195000  | 0. 23978400  | 0. 00416600  |
|      | H | 4. 04309400  | -0. 45317800 | 0. 68736000  |
|      | H | 3. 76196400  | -0. 08816900 | -1. 00934000 |
|      | H | 3. 97273000  | 1. 23102100  | 0. 15690000  |
|      | O | 1. 79012300  | 0. 62529700  | 1. 58494700  |
|      | O | 1. 62229300  | -1. 41319800 | -1. 28753400 |
|      | H | 2. 35893100  | 0. 12302100  | 2. 16676600  |
| IM15 | C | 1. 63617100  | 0. 08920000  | -0. 27696500 |
|      | H | 1. 69185600  | 0. 88778300  | 0. 47272400  |
|      | H | 1. 63610900  | 0. 58869500  | -1. 24714600 |
|      | C | 2. 85159100  | -0. 75831700 | -0. 18641500 |
|      | C | -0. 31522800 | 2. 55689400  | -0. 16987100 |
|      | H | -0. 73192300 | 2. 75178500  | -1. 17594900 |
|      | C | -0. 90283000 | 1. 38114200  | 0. 53673500  |
|      | H | -1. 92537400 | 1. 65714500  | 0. 79799500  |
|      | H | -0. 37533900 | 1. 22818000  | 1. 47500000  |
|      | C | 0. 35156800  | -0. 70428100 | -0. 09965800 |

|      |   |             |             |             |
|------|---|-------------|-------------|-------------|
|      | H | 0.35098500  | -1.13421700 | 0.90457700  |
|      | H | 0.37665200  | -1.54223600 | -0.79302600 |
|      | C | -0.91673700 | 0.11228800  | -0.32081000 |
|      | H | -0.93949000 | 0.40411200  | -1.37662900 |
|      | C | -2.20852400 | -0.69642800 | -0.06819700 |
|      | C | -3.41093200 | 0.01509600  | -0.65403000 |
|      | H | -4.31472300 | -0.52990000 | -0.39614900 |
|      | H | -3.51394300 | 1.02435400  | -0.26592700 |
|      | H | -3.33209800 | 0.06715400  | -1.73727700 |
|      | C | -2.13167700 | -2.09647400 | -0.65153800 |
|      | H | -1.39038600 | -2.70383300 | -0.13705400 |
|      | H | -3.09646400 | -2.58577000 | -0.54683800 |
|      | H | -1.86909000 | -2.07113500 | -1.70755400 |
|      | O | -2.46404500 | -0.77516500 | 1.32223400  |
|      | H | -1.78523900 | -1.30525500 | 1.73721200  |
|      | C | 4.17272200  | -0.23186700 | -0.60570100 |
|      | H | 4.91106200  | -1.02855400 | -0.70155900 |
|      | H | 4.10003600  | 0.26443100  | -1.56911300 |
|      | H | 4.56705400  | 0.49678300  | 0.11276600  |
|      | O | 2.83457400  | -1.56051200 | 0.92005700  |
|      | O | 0.53247100  | 3.28107500  | 0.27546800  |
|      | H | 3.65957400  | -2.03622200 | 0.99058800  |
| IM16 | C | 1.10054100  | 0.59023000  | -0.12094600 |
|      | H | 0.96116500  | 1.46197500  | 0.51444600  |
|      | H | 1.08961500  | 0.94920300  | -1.15056500 |
|      | C | 2.47836200  | 0.04848400  | 0.15896200  |
|      | C | -1.32478100 | 2.57306500  | -0.42911600 |
|      | H | -1.78506500 | 2.59230500  | -1.43423700 |
|      | C | -1.68803000 | 1.39134400  | 0.40602400  |
|      | H | -2.75735500 | 1.46256100  | 0.60560900  |
|      | H | -1.18652700 | 1.46279400  | 1.36810300  |
|      | C | 0.00677400  | -0.43772800 | 0.09916800  |
|      | H | 0.01598500  | -0.72813200 | 1.15134600  |
|      | H | 0.25416700  | -1.32847800 | -0.47325700 |
|      | C | -1.38055300 | 0.06038100  | -0.29087700 |
|      | H | -1.38371700 | 0.21911200  | -1.37466500 |
|      | C | -2.49367500 | -0.97102900 | -0.00142000 |
|      | C | -3.77179100 | -0.59512300 | -0.72279800 |
|      | H | -4.55931900 | -1.29113700 | -0.44819500 |
|      | H | -4.10959600 | 0.40277700  | -0.45825100 |
|      | H | -3.62848500 | -0.63800200 | -1.79977900 |
|      | C | -2.09060000 | -2.37678800 | -0.40941500 |
|      | H | -1.27607000 | -2.75395200 | 0.20531100  |
|      | H | -2.93840800 | -3.04575600 | -0.28887400 |
|      | H | -1.76817600 | -2.41063000 | -1.44833500 |
|      | O | -2.82176500 | -0.95043000 | 1.37546800  |

|      |   |             |             |             |
|------|---|-------------|-------------|-------------|
|      | H | -2.09832400 | -1.32145900 | 1.87825700  |
|      | C | 3.58402700  | 1.06039300  | 0.00751800  |
|      | H | 4.54673200  | 0.57288700  | 0.14238100  |
|      | H | 3.55939200  | 1.51468200  | -0.97824800 |
|      | H | 3.46687500  | 1.83405000  | 0.75955300  |
|      | O | 2.48741300  | -0.57211900 | 1.37949200  |
|      | O | -0.59963200 | 3.46740700  | -0.08733000 |
|      | H | 3.34137800  | -0.99442900 | 1.49151200  |
|      | O | 2.69715100  | -0.97418400 | -0.88460100 |
|      | O | 3.70359400  | -1.72314200 | -0.58861800 |
| IM17 | C | -1.15449000 | -0.64085600 | -0.47515000 |
|      | H | -1.07955700 | -1.72643600 | -0.43857300 |
|      | H | -1.23180500 | -0.34847300 | -1.52259000 |
|      | C | -2.45628800 | -0.24782100 | 0.20948500  |
|      | C | -2.65577300 | 1.25087900  | 0.06301500  |
|      | H | -2.57448600 | 1.82648600  | 1.00190300  |
|      | C | 1.54129400  | -1.83939000 | -0.70204100 |
|      | H | 1.15971100  | -2.38708600 | -1.54839900 |
|      | H | 1.98796200  | -2.38723200 | 0.11312400  |
|      | C | 0.07535800  | -0.01475500 | 0.15503200  |
|      | H | 0.13574700  | -0.34563400 | 1.19218800  |
|      | H | -0.04119500 | 1.06934000  | 0.16601200  |
|      | C | 1.37268100  | -0.36916100 | -0.58676600 |
|      | H | 1.29365400  | 0.06022000  | -1.58938600 |
|      | C | 2.61622500  | 0.26753000  | 0.07642600  |
|      | C | 3.84968900  | -0.02813900 | -0.74976000 |
|      | H | 4.72574600  | 0.39765000  | -0.26783700 |
|      | H | 3.99581200  | -1.10032700 | -0.84439900 |
|      | H | 3.75471200  | 0.39807700  | -1.74586700 |
|      | C | 2.46370400  | 1.76852300  | 0.25065300  |
|      | H | 1.70373800  | 2.01455400  | 0.98976300  |
|      | H | 3.40433600  | 2.19365800  | 0.59126100  |
|      | H | 2.18677600  | 2.24789300  | -0.68641100 |
|      | O | 2.85971400  | -0.33527200 | 1.33422800  |
|      | H | 2.17486400  | -0.07165200 | 1.94627400  |
|      | C | -3.63413700 | -0.96926600 | -0.41420000 |
|      | H | -4.56387600 | -0.72087400 | 0.09729300  |
|      | H | -3.74065200 | -0.67475300 | -1.45387400 |
|      | H | -3.48078700 | -2.04356700 | -0.35575200 |
|      | O | -2.31908300 | -0.55630500 | 1.57743000  |
|      | O | -2.88290900 | 1.78714200  | -0.98471100 |
|      | H | -3.18205500 | -0.63162000 | 1.97954000  |
| IM18 | C | 1.38739300  | 0.49417700  | -0.52017300 |
|      | H | 1.09551000  | 1.54219200  | -0.58705900 |
|      | H | 1.45252600  | 0.10734800  | -1.53567600 |
|      | C | 2.77512000  | 0.45245500  | 0.08880400  |



|      |   |             |             |             |
|------|---|-------------|-------------|-------------|
|      | C | 3.32440400  | -0.96213800 | 0.10221700  |
|      | H | 4.03217600  | -1.16801000 | 0.92562400  |
|      | C | -1.56206300 | 1.24000700  | 0.33681700  |
|      | H | -0.75956600 | 1.95820900  | 0.48027100  |
|      | H | -2.06782600 | 1.07704200  | 1.28631600  |
|      | C | 0.35369900  | -0.30015500 | 0.25701300  |
|      | H | 0.40864000  | -0.03207200 | 1.31258600  |
|      | H | 0.61158500  | -1.35464200 | 0.18156200  |
|      | C | -1.06683400 | -0.06146500 | -0.25407200 |
|      | H | -1.03754100 | 0.05422500  | -1.34023700 |
|      | C | -2.01133600 | -1.23731200 | 0.06594800  |
|      | C | -3.45624200 | -0.89208000 | -0.22585000 |
|      | H | -4.07842200 | -1.76452700 | -0.04636900 |
|      | H | -3.80514200 | -0.09337100 | 0.42157700  |
|      | H | -3.57958100 | -0.57192600 | -1.25702100 |
|      | C | -1.62808400 | -2.48007000 | -0.71873500 |
|      | H | -0.61098200 | -2.80749800 | -0.51490600 |
|      | H | -2.29986400 | -3.29238700 | -0.45407700 |
|      | H | -1.71103000 | -2.30167900 | -1.78847500 |
|      | O | -1.96899000 | -1.50239900 | 1.45718600  |
|      | H | -1.12065300 | -1.88356000 | 1.67887400  |
|      | C | 3.74929400  | 1.31173800  | -0.69776600 |
|      | H | 4.75324400  | 1.26012800  | -0.27580200 |
|      | H | 3.80350300  | 0.98376400  | -1.73194900 |
|      | H | 3.41716400  | 2.34710500  | -0.67355600 |
|      | O | 2.67606600  | 0.89379800  | 1.42462900  |
|      | O | 3.05045400  | -1.80297200 | -0.70582700 |
|      | H | 3.50632600  | 1.26920700  | 1.71034100  |
|      | O | -2.49355900 | 1.83884200  | -0.57757100 |
|      | O | -2.91424200 | 2.98267000  | -0.14807300 |
| IM19 | C | -1.76753300 | -0.56317100 | -0.54961800 |
|      | H | -1.23551400 | -1.50500100 | -0.70141400 |
|      | H | -1.97423500 | -0.15498800 | -1.53785500 |
|      | C | -3.09533400 | -0.88509400 | 0.11568400  |
|      | C | -3.94556500 | 0.35722500  | 0.27390600  |
|      | H | -4.60253400 | 0.34812400  | 1.15827400  |
|      | C | 1.31296500  | -0.64147400 | 0.17564100  |
|      | H | 0.67944200  | -1.51258200 | 0.32828600  |
|      | H | 1.81266700  | -0.39107200 | 1.11192000  |
|      | C | -0.91181600 | 0.41574900  | 0.23214900  |
|      | H | -0.86508400 | 0.10272800  | 1.27625500  |
|      | H | -1.40923600 | 1.38334400  | 0.21412100  |
|      | C | 0.50467700  | 0.53881800  | -0.32857000 |
|      | H | 0.46184400  | 0.46746800  | -1.41788800 |
|      | C | 1.16244200  | 1.88632900  | 0.02774900  |
|      | C | 2.63157000  | 1.90009700  | -0.33451800 |

|      |   |             |             |             |
|------|---|-------------|-------------|-------------|
|      | H | 3.04942400  | 2.87682100  | -0.10636700 |
|      | H | 3.18182300  | 1.15313200  | 0.22863300  |
|      | H | 2.76918800  | 1.69294400  | -1.39279300 |
|      | C | 0.46343500  | 3.03995200  | -0.67077300 |
|      | H | -0.58754500 | 3.11854400  | -0.40108200 |
|      | H | 0.94882700  | 3.97270500  | -0.39617700 |
|      | H | 0.52128500  | 2.92878000  | -1.75124900 |
|      | O | 1.12168800  | 2.06713700  | 1.43262300  |
|      | H | 0.22023500  | 2.23868700  | 1.70098200  |
|      | C | -3.90424100 | -1.86971800 | -0.71454900 |
|      | H | -4.85995000 | -2.08137000 | -0.24096000 |
|      | H | -4.08378100 | -1.47728800 | -1.71144400 |
|      | H | -3.35475600 | -2.80564800 | -0.81164300 |
|      | O | -2.92629300 | -1.36363300 | 1.43018400  |
|      | O | -3.94280600 | 1.26649000  | -0.50657100 |
|      | H | -2.63679800 | -2.27358800 | 1.40546400  |
|      | O | 2.27099700  | -0.97241600 | -0.82398100 |
|      | O | 2.81834300  | -2.21773100 | -0.50239000 |
|      | N | 3.99039000  | -2.13376900 | 0.20891100  |
|      | O | 4.32411800  | -1.05705300 | 0.49762900  |
| IM20 | C | 1.26926800  | 0.49575600  | -0.55185600 |
|      | H | 1.12578300  | 1.57164800  | -0.67220000 |
|      | H | 1.29055500  | 0.06683000  | -1.55255700 |
|      | C | 2.63091200  | 0.27686600  | 0.08601600  |
|      | C | 2.95528400  | -1.19718300 | 0.19822100  |
|      | H | 3.58378900  | -1.45900200 | 1.06438700  |
|      | C | -1.53869300 | 1.73981100  | 0.25788700  |
|      | H | -0.59357900 | 2.24440700  | 0.47642600  |
|      | H | -2.10575100 | 1.59909000  | 1.18486500  |
|      | C | 0.12138600  | -0.10896100 | 0.23333600  |
|      | H | 0.21069500  | 0.17059600  | 1.28365300  |
|      | H | 0.21486400  | -1.19245700 | 0.18197300  |
|      | C | -1.24384100 | 0.31954200  | -0.29679500 |
|      | H | -1.19673500 | 0.38820200  | -1.38506200 |
|      | C | -2.36714500 | -0.66896300 | 0.06364300  |
|      | C | -3.73626200 | -0.11596000 | -0.26795500 |
|      | H | -4.48839100 | -0.86799700 | -0.04524000 |
|      | H | -3.95436200 | 0.76974400  | 0.31972400  |
|      | H | -3.80074600 | 0.15424000  | -1.31832400 |
|      | C | -2.17575100 | -1.99053800 | -0.66316100 |
|      | H | -1.22858400 | -2.46745500 | -0.42072900 |
|      | H | -2.97460500 | -2.67175800 | -0.38263400 |
|      | H | -2.20960800 | -1.84741200 | -1.74074500 |
|      | O | -2.37742500 | -0.87923800 | 1.46390000  |
|      | H | -1.60374300 | -1.38283500 | 1.71258800  |
|      | C | 3.73723300  | 0.91060700  | -0.74347900 |

|      |   |             |             |             |
|------|---|-------------|-------------|-------------|
|      | H | 4.70914500  | 0.73681100  | -0.28787600 |
|      | H | 3.74294900  | 0.50755200  | -1.75227400 |
|      | H | 3.57616900  | 1.98626100  | -0.80811500 |
|      | O | 2.67561600  | 0.74506000  | 1.41425800  |
|      | O | 2.59674000  | -2.01826100 | -0.59760800 |
|      | H | 2.71323900  | 1.69963200  | 1.41584800  |
|      | O | -2.26060900 | 2.40594400  | -0.67665800 |
| IM21 | C | -1.05879300 | -0.47490300 | 1.49036700  |
|      | H | -1.04025400 | 0.39310600  | 2.14844000  |
|      | H | -1.53653000 | -1.28902500 | 2.03397300  |
|      | C | -1.91709800 | -0.10237900 | 0.30484900  |
|      | C | -1.22991400 | 0.97980800  | -0.53000700 |
|      | H | -1.81872900 | 1.12959000  | -1.43659800 |
|      | C | 0.18353900  | 0.59708800  | -0.90301800 |
|      | H | 0.59887100  | 1.43221800  | -1.45966900 |
|      | H | 0.16709100  | -0.26592000 | -1.56813900 |
|      | C | 0.36002800  | -0.84546000 | 1.09727500  |
|      | H | 0.33010100  | -1.75286000 | 0.48950100  |
|      | H | 0.91276400  | -1.08034500 | 2.00387400  |
|      | C | 1.03745300  | 0.27057200  | 0.31302400  |
|      | H | 1.07800100  | 1.15827400  | 0.94950400  |
|      | C | 2.48719700  | -0.07177000 | -0.08090200 |
|      | C | 3.12922300  | 1.06306300  | -0.85345600 |
|      | H | 4.18207400  | 0.84721800  | -1.01401800 |
|      | H | 2.66554000  | 1.17918000  | -1.82753700 |
|      | H | 3.04347200  | 2.00042700  | -0.30832300 |
|      | C | 3.33220900  | -0.38435400 | 1.14334900  |
|      | H | 2.99729200  | -1.28916700 | 1.64635100  |
|      | H | 4.36570900  | -0.53718300 | 0.84392300  |
|      | H | 3.29715500  | 0.43134200  | 1.86295500  |
|      | O | 2.51137500  | -1.17655700 | -0.96839200 |
|      | H | 2.25881400  | -1.96667100 | -0.49430000 |
|      | C | -3.32371000 | 0.27038600  | 0.69903600  |
|      | H | -3.91442200 | 0.52361100  | -0.17727800 |
|      | H | -3.80309900 | -0.55984500 | 1.21137600  |
|      | H | -3.30268100 | 1.11733900  | 1.37950600  |
|      | O | -1.16448800 | 2.17121800  | 0.22243100  |
|      | O | -1.96624500 | -1.31091300 | -0.50451500 |
|      | O | -2.69124800 | -1.17338200 | -1.56625100 |
|      | H | -1.99710700 | 2.63314500  | 0.16716600  |
| IM22 | C | -0.45812400 | 0.52418000  | 1.60554300  |
|      | H | -0.22013700 | 1.55271900  | 1.87398800  |
|      | H | -1.02364600 | 0.08931400  | 2.42813600  |
|      | C | -1.34728600 | 0.59690500  | 0.38181300  |
|      | C | -0.54733300 | 1.14715700  | -0.80234800 |
|      | H | -1.17199500 | 1.10513200  | -1.69624200 |

|      |   |             |             |             |
|------|---|-------------|-------------|-------------|
|      | C | 0.71816000  | 0.35675000  | -1.03979700 |
|      | H | 1.22817400  | 0.81638000  | -1.88157700 |
|      | H | 0.46129000  | -0.66160600 | -1.32608800 |
|      | C | 0.82490100  | -0.24950700 | 1.36077700  |
|      | H | 0.57369100  | -1.29401100 | 1.16274400  |
|      | H | 1.41451300  | -0.22525700 | 2.27447600  |
|      | C | 1.61412400  | 0.32151200  | 0.18903500  |
|      | H | 1.88787900  | 1.35011100  | 0.43792700  |
|      | C | 2.92526900  | -0.44136500 | -0.08056100 |
|      | C | 3.72004200  | 0.21109500  | -1.19408800 |
|      | H | 4.68005000  | -0.28743500 | -1.29788600 |
|      | H | 3.20295000  | 0.12670200  | -2.14418800 |
|      | H | 3.89366200  | 1.26326900  | -0.98032700 |
|      | C | 3.78664200  | -0.51760400 | 1.16916200  |
|      | H | 3.32581000  | -1.13262900 | 1.93944800  |
|      | H | 4.74749700  | -0.96229500 | 0.92375600  |
|      | H | 3.95942700  | 0.47179400  | 1.58864600  |
|      | O | 2.65329800  | -1.75206700 | -0.54685500 |
|      | H | 2.27600100  | -2.26725000 | 0.16379400  |
|      | C | -2.60453300 | 1.38854000  | 0.64970500  |
|      | H | -3.24406200 | 1.42563900  | -0.23082200 |
|      | H | -3.16207400 | 0.94260100  | 1.46828800  |
|      | H | -2.34627000 | 2.40639600  | 0.92909500  |
|      | O | -0.17806100 | 2.48345300  | -0.52959000 |
|      | O | -1.66574100 | -0.78213500 | 0.13194600  |
|      | O | -2.44979400 | -0.87636100 | -1.02362300 |
|      | O | -4.00965400 | -1.43153800 | 0.35347600  |
|      | N | -3.74144900 | -1.27835400 | -0.76703600 |
|      | H | -0.88418000 | 3.07210400  | -0.78217600 |
| IM23 | C | 1.33545900  | -1.13925000 | -0.83039200 |
|      | H | 1.45586300  | -0.60761000 | -1.77412000 |
|      | H | 1.80432200  | -2.11586400 | -0.93122900 |
|      | C | 2.13616500  | -0.31822400 | 0.20379600  |
|      | C | 1.42614700  | 1.04939400  | 0.35568100  |
|      | H | 1.93380900  | 1.59698000  | 1.15326000  |
|      | C | -0.03269400 | 0.89708700  | 0.70579500  |
|      | H | -0.44281700 | 1.89860000  | 0.80291800  |
|      | H | -0.11986700 | 0.40693200  | 1.67302400  |
|      | C | -0.13365100 | -1.26822600 | -0.48809000 |
|      | H | -0.23412400 | -1.83795800 | 0.43777900  |
|      | H | -0.61042500 | -1.84261900 | -1.27971900 |
|      | C | -0.79881300 | 0.09279600  | -0.33328600 |
|      | H | -0.72421200 | 0.61207100  | -1.29207700 |
|      | C | -2.29775400 | -0.00379300 | 0.01099300  |
|      | C | -2.93843600 | 1.36879900  | 0.05545800  |
|      | H | -4.00973200 | 1.26707700  | 0.20686100  |

|      |   |             |             |             |
|------|---|-------------|-------------|-------------|
|      | H | -2.54497700 | 1.95621300  | 0.87832900  |
|      | H | -2.76624900 | 1.90603900  | -0.87434800 |
|      | C | -3.04075200 | -0.86883600 | -0.99423600 |
|      | H | -2.72645600 | -1.90924900 | -0.94084100 |
|      | H | -4.10703700 | -0.83577200 | -0.78652700 |
|      | H | -2.87479300 | -0.52008800 | -2.01193000 |
|      | O | -2.47776300 | -0.53356500 | 1.31292500  |
|      | H | -2.20670400 | -1.44976600 | 1.32044800  |
|      | C | 3.58182000  | -0.16745400 | -0.23582800 |
|      | H | 4.13081500  | 0.45365000  | 0.47017500  |
|      | H | 4.05666800  | -1.14440800 | -0.26047300 |
|      | H | 3.65816700  | 0.27181800  | -1.22780700 |
|      | O | 1.51044200  | 1.77058900  | -0.85108000 |
|      | O | 2.03219500  | -0.99988000 | 1.37313700  |
|      | H | 2.38381700  | 2.14304500  | -0.94292300 |
| IM24 | C | 1.80224100  | 0.32648800  | -0.15189700 |
|      | H | 1.75751600  | 1.13318900  | 0.58196200  |
|      | H | 1.75915100  | 0.83311600  | -1.11842600 |
|      | C | 3.14807800  | -0.33237000 | -0.01392700 |
|      | C | -0.68432100 | 2.50022300  | 0.37080500  |
|      | H | -0.34396900 | 3.30955800  | 0.99745100  |
|      | C | -0.88587000 | 1.13580400  | 0.91477900  |
|      | H | -1.87375300 | 1.05091700  | 1.37811300  |
|      | H | -0.18356900 | 0.98019800  | 1.73271500  |
|      | C | 0.65215700  | -0.64249800 | 0.00654700  |
|      | H | 0.74025300  | -1.13120100 | 0.97926800  |
|      | H | 0.77565000  | -1.42721900 | -0.73570000 |
|      | C | -0.71489500 | 0.01409700  | -0.12776800 |
|      | H | -0.75581500 | 0.45153900  | -1.13201100 |
|      | C | -1.88318600 | -0.99061700 | -0.05763600 |
|      | C | -3.17202600 | -0.32344900 | -0.49583500 |
|      | H | -4.00233800 | -1.01301300 | -0.37183000 |
|      | H | -3.39136700 | 0.56154900  | 0.09621500  |
|      | H | -3.11573300 | -0.04356600 | -1.54683400 |
|      | C | -1.64482000 | -2.21689900 | -0.92197200 |
|      | H | -0.83830300 | -2.83318900 | -0.53065900 |
|      | H | -2.54515900 | -2.82518900 | -0.94694000 |
|      | H | -1.38771800 | -1.93847100 | -1.94253000 |
|      | O | -2.10557000 | -1.39124900 | 1.28168200  |
|      | H | -1.36616700 | -1.91997500 | 1.57747000  |
|      | C | 4.34828600  | 0.51510100  | -0.31594900 |
|      | H | 5.24949900  | 0.01100500  | 0.01263400  |
|      | H | 4.40659600  | 0.68292000  | -1.39052800 |
|      | H | 4.26892800  | 1.49189200  | 0.15539600  |
|      | O | 3.25621200  | -1.48735900 | 0.31646300  |
|      | O | -1.52877400 | 2.94262300  | -0.59649900 |

|      |             |             |             |             |
|------|-------------|-------------|-------------|-------------|
|      | H           | -1.92251300 | 2.19854300  | -1.05181200 |
| IM25 | C           | -1.87038400 | 0.09656000  | 0.06358800  |
|      | H           | -1.79058700 | 0.86765200  | -0.70480900 |
|      | H           | -1.81287500 | 0.64468400  | 1.00583800  |
|      | C           | -3.24238500 | -0.51047600 | -0.05468000 |
|      | C           | 1.22694800  | 2.04000000  | -0.71798900 |
|      | H           | 1.38330400  | 2.64476200  | -1.60542200 |
|      | C           | 0.92276400  | 0.60674900  | -1.08937900 |
|      | H           | 1.76607200  | 0.24674400  | -1.67486800 |
|      | H           | 0.07976500  | 0.62323400  | -1.77906200 |
|      | C           | -0.76855500 | -0.93373100 | -0.03790700 |
|      | H           | -0.88149200 | -1.46971000 | -0.98246700 |
|      | H           | -0.94008100 | -1.66739800 | 0.74469200  |
|      | C           | 0.64166900  | -0.36192400 | 0.06845600  |
|      | H           | 0.70287300  | 0.16990700  | 1.02343900  |
|      | C           | 1.71744600  | -1.47283800 | 0.11918200  |
|      | C           | 3.08303000  | -0.89158900 | 0.42056700  |
|      | H           | 3.82537100  | -1.68408300 | 0.38621500  |
|      | H           | 3.37062000  | -0.12974600 | -0.29679300 |
|      | H           | 3.09865100  | -0.45213300 | 1.41647800  |
|      | C           | 1.39548300  | -2.53363200 | 1.15865200  |
|      | H           | 0.54064900  | -3.14069700 | 0.86955900  |
| H    | 2.24742500  | -3.19832400 | 1.27342600  |             |
| H    | 1.17568600  | -2.08483300 | 2.12565800  |             |
| O    | 1.84511100  | -2.07847900 | -1.15474900 |             |
| H    | 1.06410300  | -2.59934200 | -1.33500400 |             |
| C    | -4.40677400 | 0.40750400  | 0.16904600  |             |
| H    | -5.32732300 | -0.08523900 | -0.12074600 |             |
| H    | -4.45907100 | 0.67066300  | 1.22451000  |             |
| H    | -4.28529800 | 1.33606800  | -0.38375100 |             |
| O    | -3.39676300 | -1.67959800 | -0.30908300 |             |
| O    | 2.28818800  | 2.22930600  | 0.10799000  |             |
| H    | 2.09200700  | 1.82215900  | 0.95441900  |             |
| O    | -0.01342800 | 2.48946400  | 1.14714600  |             |
| O    | 0.02123500  | 2.64004500  | -0.13362100 |             |
| IM26 | C           | 1.60387500  | -0.67872700 | 0.14469100  |
|      | H           | 1.64578800  | -1.51350900 | -0.55688300 |
|      | H           | 1.62054300  | -1.13519500 | 1.13752900  |
|      | C           | 2.86336800  | 0.13289700  | 0.00537000  |
|      | C           | 0.34423700  | 0.13347400  | -0.05194200 |
|      | H           | 0.34985300  | 0.56852000  | -1.05323700 |
|      | H           | 0.38695300  | 0.99693700  | 0.62447200  |
|      | C           | -0.89407400 | -0.64937900 | 0.15320000  |
|      | H           | -0.84724600 | -1.59579500 | 0.67639800  |
|      | C           | -2.24510400 | -0.03283500 | -0.02485300 |
|      | C           | -3.23385300 | -1.05370800 | -0.55066600 |

|      |   |             |             |             |
|------|---|-------------|-------------|-------------|
|      | H | -4.21630600 | -0.59992400 | -0.65326700 |
|      | H | -2.91358200 | -1.41255500 | -1.52444100 |
|      | H | -3.30666000 | -1.90011600 | 0.12768500  |
|      | C | -2.73694500 | 0.54543600  | 1.30027500  |
|      | H | -2.04246500 | 1.29635700  | 1.67582300  |
|      | H | -3.70884300 | 1.01369600  | 1.15883700  |
|      | H | -2.82790700 | -0.23123900 | 2.05576700  |
|      | O | -2.21160900 | 0.99435400  | -0.99854300 |
|      | H | -1.68596700 | 1.72274400  | -0.67183200 |
|      | C | 4.15797800  | -0.62470200 | 0.00067800  |
|      | H | 4.25783100  | -1.15553600 | -0.94510500 |
|      | H | 4.98912500  | 0.06187700  | 0.11015200  |
|      | H | 4.17956700  | -1.37180100 | 0.79069200  |
|      | O | 2.83191200  | 1.33324700  | -0.10309500 |
| IM27 | C | 1.70286500  | 0.38260700  | -0.23261700 |
|      | H | 1.73819100  | 1.28434800  | 0.37852500  |
|      | H | 1.71622300  | 0.74047500  | -1.26490900 |
|      | C | 2.96444400  | -0.40780400 | -0.00942900 |
|      | C | 0.45778400  | -0.42841200 | 0.04627600  |
|      | H | 0.43980800  | -0.70491700 | 1.09929100  |
|      | H | 0.50959300  | -1.35442800 | -0.52169100 |
|      | C | -0.81774600 | 0.30215100  | -0.29926900 |
|      | H | -0.81479400 | 0.63082800  | -1.33714400 |
|      | C | -2.10729900 | -0.47518500 | -0.01274200 |
|      | C | -3.30781800 | 0.43260700  | -0.17366900 |
|      | H | -4.21633400 | -0.14357500 | -0.02498900 |
|      | H | -3.27918800 | 1.22958000  | 0.56157900  |
|      | H | -3.32994300 | 0.87359400  | -1.16749600 |
|      | C | -2.21021500 | -1.66052800 | -0.95705900 |
|      | H | -1.40421700 | -2.37502000 | -0.80046500 |
|      | H | -3.15185000 | -2.17318900 | -0.78113400 |
|      | H | -2.18153200 | -1.34391900 | -1.99727700 |
|      | O | -2.13407700 | -0.91039900 | 1.32758800  |
|      | H | -1.54449500 | -1.65451000 | 1.43721600  |
|      | C | 4.25403600  | 0.35354500  | -0.06479400 |
|      | H | 4.34284400  | 0.96777300  | 0.83024900  |
|      | H | 5.08974400  | -0.33483400 | -0.10643400 |
|      | H | 4.27657600  | 1.02818800  | -0.91744700 |
|      | O | 2.93413500  | -1.59327600 | 0.21051300  |
|      | O | -0.86067300 | 1.51217700  | 0.48636700  |
|      | O | -0.41525200 | 2.53346400  | -0.17047500 |
| IM28 | C | 1.65320200  | -0.19785700 | -0.27857200 |
|      | H | 1.73636800  | 0.71352800  | 0.31313700  |
|      | H | 1.69079100  | 0.12070600  | -1.32353300 |
|      | C | 2.87384100  | -1.04340400 | -0.02377300 |
|      | C | 0.36822900  | -0.93261100 | 0.02592900  |

|      |   |             |             |             |
|------|---|-------------|-------------|-------------|
|      | H | 0.33633300  | -1.15156400 | 1.09268400  |
|      | H | 0.38627500  | -1.88988100 | -0.48921000 |
|      | C | -0.87213600 | -0.16698700 | -0.37382400 |
|      | H | -0.89456000 | -0.01829400 | -1.45304800 |
|      | C | -2.19637900 | -0.82714000 | 0.03957300  |
|      | C | -3.35874200 | 0.04764200  | -0.37616700 |
|      | H | -4.28949100 | -0.42979500 | -0.08410400 |
|      | H | -3.29480700 | 1.01343100  | 0.11291300  |
|      | H | -3.36496800 | 0.19692200  | -1.45349400 |
|      | C | -2.31207200 | -2.20330000 | -0.59082400 |
|      | H | -1.55922500 | -2.88798800 | -0.20524300 |
|      | H | -3.29036200 | -2.61753000 | -0.36333200 |
|      | H | -2.20187600 | -2.15716300 | -1.67230100 |
|      | O | -2.27486400 | -0.92139600 | 1.44392800  |
|      | H | -1.70662700 | -1.62433600 | 1.75359200  |
|      | C | 4.20147600  | -0.35465100 | -0.11739200 |
|      | H | 4.26421700  | 0.25615700  | -1.01509200 |
|      | H | 4.31761500  | 0.31546600  | 0.73320600  |
|      | H | 5.00002900  | -1.08686500 | -0.10495800 |
|      | O | 2.78255800  | -2.21437400 | 0.24887000  |
|      | O | -0.85940300 | 1.12995900  | 0.23435700  |
|      | O | -0.44003600 | 2.03338500  | -0.76048700 |
|      | N | 0.34511000  | 3.03011100  | -0.27580400 |
|      | O | 0.58049500  | 2.98571000  | 0.86579700  |
| IM29 | C | 1.44847800  | -0.11858900 | -0.54884000 |
|      | H | 1.58290800  | 0.05582600  | -1.61882600 |
|      | H | 1.12693800  | -1.15591800 | -0.45398100 |
|      | C | 2.78792700  | 0.00613500  | 0.12186900  |
|      | C | 0.40909100  | 0.81037300  | 0.03590000  |
|      | H | 0.70374900  | 1.84388100  | -0.12850500 |
|      | H | 0.37379100  | 0.66537700  | 1.11204700  |
|      | C | -0.98446100 | 0.63144400  | -0.57015500 |
|      | H | -0.85318600 | 0.29406100  | -1.61591400 |
|      | C | -1.88515400 | -0.40487300 | 0.12254400  |
|      | C | -2.33704200 | 0.10796000  | 1.47561500  |
|      | H | -2.99192700 | -0.61946100 | 1.95354200  |
|      | H | -1.49043700 | 0.28410600  | 2.13304700  |
|      | H | -2.89264500 | 1.03530100  | 1.35947300  |
|      | C | -3.07928400 | -0.70679700 | -0.75877500 |
|      | H | -2.75284100 | -1.14873100 | -1.69761800 |
|      | H | -3.75361600 | -1.40644000 | -0.26689200 |
|      | H | -3.63161700 | 0.20460500  | -0.97215900 |
|      | O | -1.07467100 | -1.55486400 | 0.27013000  |
|      | H | -1.57221100 | -2.23003400 | 0.72762800  |
|      | C | 3.92553800  | -0.74786200 | -0.50210000 |
|      | H | 4.20479500  | -0.26737300 | -1.43879800 |



|      |   |             |             |             |
|------|---|-------------|-------------|-------------|
|      | H | 4.77960400  | -0.74658200 | 0.16486900  |
|      | H | 3.63500100  | -1.76859000 | -0.73989800 |
|      | O | 2.94309900  | 0.67890700  | 1.11061100  |
|      | O | -1.64078500 | 1.81261100  | -0.72753600 |
| IM30 | C | 0.00878500  | 0.03028900  | -0.23221200 |
|      | C | -1.21599300 | -0.76292900 | 0.03381700  |
|      | H | -1.41025100 | -0.86572800 | 1.10896600  |
|      | H | -2.09882400 | -0.30459100 | -0.41283300 |
|      | H | -1.12336800 | -1.76326700 | -0.37954200 |
|      | C | 1.34979900  | -0.53524000 | 0.02661700  |
|      | H | 2.12128300  | 0.10123500  | -0.39888800 |
|      | H | 1.55303200  | -0.62065500 | 1.10080300  |
|      | H | 1.43980700  | -1.52749900 | -0.40667100 |
|      | O | -0.04968000 | 1.36278800  | 0.06041400  |
|      | H | -0.93978500 | 1.68548000  | -0.06447800 |
| IM31 | C | 0.36281300  | 0.02856700  | 0.06352400  |
|      | C | 0.38772500  | 1.48581600  | -0.32338900 |
|      | H | 0.49991400  | 1.59911400  | -1.39739100 |
|      | H | -0.54055000 | 1.96319100  | -0.01904300 |
|      | H | 1.21771600  | 1.97467500  | 0.17710100  |
|      | C | 1.55150400  | -0.76262700 | -0.39203600 |
|      | H | 1.43842400  | -1.79720100 | -0.08543100 |
|      | H | 1.64778700  | -0.71338100 | -1.47190700 |
|      | H | 2.44856600  | -0.35591800 | 0.06352100  |
|      | O | 0.18651000  | -0.16050900 | 1.40783600  |
|      | H | -0.64322500 | 0.25069700  | 1.65892500  |
|      | O | -1.89407300 | -0.18926900 | -0.13598200 |
|      | O | -0.77754700 | -0.57918500 | -0.64864900 |
| IM32 | C | 0.05234300  | 2.68072100  | 0.04969600  |
|      | H | -0.47370800 | 2.56255500  | -0.88381800 |
|      | H | -0.01669100 | 3.62270300  | 0.57142300  |
|      | C | -2.35620200 | 0.00229400  | -0.64224700 |
|      | C | -0.27554400 | -0.55510600 | 0.61209900  |
|      | H | -0.39370500 | -1.53716800 | 0.15808900  |
|      | H | 0.08005500  | -0.72831900 | 1.63175300  |
|      | C | 0.96596800  | 1.62584300  | 0.54295400  |
|      | H | 0.86808400  | 1.51784100  | 1.62879300  |
|      | H | 1.99527100  | 1.97796600  | 0.39933900  |
|      | C | 0.79398800  | 0.25205900  | -0.11384900 |
|      | H | 0.48121600  | 0.40004300  | -1.14812600 |
|      | C | -3.52211500 | -0.91971300 | -0.77890600 |
|      | H | -4.31044800 | -0.61592200 | -0.09440000 |
|      | H | -3.87400000 | -0.90417900 | -1.80326400 |
|      | H | -3.24012100 | -1.92729200 | -0.48141000 |
|      | O | -1.94078300 | 0.66416400  | -1.56269100 |
|      | C | -1.66240900 | 0.07430200  | 0.70172800  |

|      |   |             |             |             |
|------|---|-------------|-------------|-------------|
|      | H | -1.58384500 | 1.13336300  | 0.95878100  |
|      | C | 2.13582900  | -0.51378300 | -0.14639100 |
|      | C | 1.96777900  | -1.96750500 | -0.53953100 |
|      | H | 1.48785300  | -2.53053000 | 0.25466300  |
|      | H | 1.37730200  | -2.06019300 | -1.44863800 |
|      | H | 2.94388300  | -2.41213200 | -0.71354300 |
|      | C | 3.10633000  | 0.13880900  | -1.11785900 |
|      | H | 3.28003800  | 1.18924800  | -0.89474800 |
|      | H | 4.06261900  | -0.37622300 | -1.07369900 |
|      | H | 2.72779300  | 0.07689600  | -2.13558100 |
|      | O | 2.70056800  | -0.55360900 | 1.15529000  |
|      | H | 3.01158300  | 0.31989400  | 1.38682200  |
|      | O | -2.46535700 | -0.60830700 | 1.63331400  |
|      | H | -2.01440000 | -0.63405700 | 2.47411100  |
| IM33 | C | -0.90387100 | 2.02023700  | -1.03462600 |
|      | H | 0.00497600  | 2.33985300  | -0.53314400 |
|      | H | -1.06467700 | 2.59208600  | -1.94438500 |
|      | C | 2.44673200  | 0.62149700  | 0.45260600  |
|      | C | 0.82161400  | -1.05155000 | -0.41950000 |
|      | H | 1.11884500  | -1.67942000 | 0.41812500  |
|      | H | 0.64638600  | -1.72355500 | -1.26428400 |
|      | C | -0.91746600 | 0.53426500  | -1.30941700 |
|      | H | -0.26703200 | 0.35196500  | -2.16447200 |
|      | H | -1.91563600 | 0.27375700  | -1.65944900 |
|      | C | -0.49155800 | -0.33775000 | -0.11836300 |
|      | H | -0.35259400 | 0.31177700  | 0.74812700  |
|      | C | 3.52225000  | 0.04969000  | 1.31380800  |
|      | H | 4.45942300  | 0.05291700  | 0.76183900  |
|      | H | 3.61336000  | 0.63682900  | 2.21947100  |
|      | H | 3.31222000  | -0.99227200 | 1.54492800  |
|      | O | 1.89086200  | 1.66348800  | 0.69988700  |
|      | C | 2.02170600  | -0.17504700 | -0.76143700 |
|      | H | 1.76964600  | 0.54960500  | -1.53776500 |
|      | C | -1.58459600 | -1.36191300 | 0.26284000  |
|      | C | -1.12622000 | -2.29244500 | 1.36898900  |
|      | H | -0.39347200 | -3.00415600 | 1.00190400  |
|      | H | -0.69572700 | -1.73203600 | 2.19617600  |
|      | H | -1.97410800 | -2.86089600 | 1.74084000  |
|      | C | -2.85588500 | -0.66246900 | 0.70591200  |
|      | H | -3.24960000 | 0.00923100  | -0.05425900 |
|      | H | -3.61626200 | -1.40609600 | 0.93230800  |
|      | H | -2.67693700 | -0.06443000 | 1.59580000  |
|      | O | -1.85311200 | -2.20694800 | -0.84700800 |
|      | H | -2.47768000 | -1.77706000 | -1.42754200 |
|      | O | 3.11365900  | -0.96504500 | -1.15707700 |
|      | H | 2.82343600  | -1.60438500 | -1.80424000 |

|      |   |             |             |             |
|------|---|-------------|-------------|-------------|
|      | O | -2.01478500 | 2.37951100  | -0.19852700 |
|      | O | -1.71922400 | 2.33639400  | 1.06086800  |
| IM34 | C | -1.44094900 | -0.78059500 | 0.77498400  |
|      | H | -0.84665900 | -1.61370700 | 0.40641400  |
|      | H | -2.06307100 | -1.09256000 | 1.61242200  |
|      | C | 2.07386400  | -1.84045400 | -0.48084100 |
|      | C | 1.84645000  | 0.44736500  | 0.47892800  |
|      | H | 2.56430800  | 0.74832300  | -0.28137100 |
|      | H | 2.08163200  | 1.02974800  | 1.37414200  |
|      | C | -0.57830800 | 0.40038300  | 1.14622800  |
|      | H | -0.05848700 | 0.15356800  | 2.07150900  |
|      | H | -1.24325600 | 1.22375900  | 1.40430800  |
|      | C | 0.42659900  | 0.80623500  | 0.05770600  |
|      | H | 0.17841500  | 0.26402000  | -0.85562800 |
|      | C | 3.37273900  | -2.18024500 | -1.13070500 |
|      | H | 3.94232900  | -2.83113000 | -0.47141400 |
|      | H | 3.18608900  | -2.66580900 | -2.08073600 |
|      | H | 3.97701100  | -1.28565600 | -1.26394000 |
|      | O | 1.00626400  | -2.16664300 | -0.93963600 |
|      | C | 2.11517500  | -1.02146200 | 0.79182200  |
|      | H | 1.34436400  | -1.42626500 | 1.45099100  |
|      | C | 0.32052600  | 2.30807800  | -0.28348400 |
|      | C | 1.39188400  | 2.74192300  | -1.26543600 |
|      | H | 2.36738600  | 2.76883500  | -0.79009900 |
|      | H | 1.43174400  | 2.07155200  | -2.12156800 |
|      | H | 1.17505100  | 3.74511600  | -1.62165400 |
|      | C | -1.04195000 | 2.63374700  | -0.86747700 |
|      | H | -1.85751700 | 2.38715600  | -0.19169400 |
|      | H | -1.09498600 | 3.69650700  | -1.09102200 |
|      | H | -1.20891900 | 2.07539200  | -1.78517800 |
|      | O | 0.55388700  | 3.08198300  | 0.88382800  |
|      | H | -0.24933800 | 3.12883500  | 1.39845100  |
|      | O | 3.38784300  | -1.18484600 | 1.36263000  |
|      | H | 3.50170200  | -0.55153200 | 2.06803100  |
|      | O | -2.27605400 | -0.31644100 | -0.28103700 |
|      | O | -2.99133900 | -1.40182300 | -0.78627900 |
|      | O | -4.48078800 | -0.78294200 | 0.63333700  |
|      | N | -4.23463800 | -1.53575700 | -0.22072200 |
| IM35 | C | 0.73723900  | 2.41689700  | 0.59333000  |
|      | H | -0.29983800 | 2.50424100  | 0.22170600  |
|      | H | 0.85070600  | 3.17955200  | 1.37207000  |
|      | C | -2.40238900 | 0.36649200  | -0.50043300 |
|      | C | -0.52855000 | -0.93580200 | 0.50357100  |
|      | H | -0.73747200 | -1.69972600 | -0.24299500 |
|      | H | -0.24000000 | -1.46507500 | 1.41580500  |
|      | C | 0.95361400  | 1.00784800  | 1.12088400  |

|      |   |             |             |             |
|------|---|-------------|-------------|-------------|
|      | H | 0.34301000  | 0.87288100  | 2.01327000  |
|      | H | 1.98306400  | 0.94278700  | 1.47225100  |
|      | C | 0.64904000  | -0.06999900 | 0.07378800  |
|      | H | 0.39401700  | 0.43806900  | -0.85866300 |
|      | C | -3.41492900 | -0.43830700 | -1.24256300 |
|      | H | -4.33317200 | -0.47580900 | -0.66060000 |
|      | H | -3.59970700 | 0.01300400  | -2.20980300 |
|      | H | -3.08312500 | -1.46840600 | -1.34870700 |
|      | O | -2.00118400 | 1.43588700  | -0.89254800 |
|      | C | -1.84256100 | -0.21207800 | 0.78033000  |
|      | H | -1.68846500 | 0.62849600  | 1.45944700  |
|      | C | 1.88472600  | -0.94112200 | -0.23894200 |
|      | C | 1.55917400  | -2.05054400 | -1.22049500 |
|      | H | 0.95480700  | -2.82085900 | -0.75171300 |
|      | H | 1.02961800  | -1.66057500 | -2.08722600 |
|      | H | 2.47856500  | -2.51944500 | -1.55988600 |
|      | C | 3.00998100  | -0.09695300 | -0.80880500 |
|      | H | 3.31468200  | 0.70238900  | -0.13650600 |
|      | H | 3.87268600  | -0.72954600 | -1.00318000 |
|      | H | 2.70119000  | 0.37799900  | -1.73633300 |
|      | O | 2.31619400  | -1.60687100 | 0.93824600  |
|      | H | 2.81641100  | -0.99793700 | 1.47798400  |
|      | O | -2.79857700 | -1.09985300 | 1.30081700  |
|      | H | -2.40362200 | -1.61121500 | 2.00385600  |
|      | O | 1.48539000  | 2.70966100  | -0.49711000 |
| IM36 | C | -0.22387700 | -1.17734000 | 0.36456500  |
|      | H | -0.13786700 | -1.29334800 | 1.44837600  |
|      | H | -0.79435000 | -2.03785200 | 0.01644600  |
|      | C | -0.94014900 | 0.09697200  | 0.04384000  |
|      | C | -0.21991900 | 1.20990100  | -0.05333100 |
|      | H | -0.69451500 | 2.15191600  | -0.29365200 |
|      | C | 1.26155100  | 1.20076700  | 0.14992600  |
|      | H | 1.51177600  | 1.21004200  | 1.23177900  |
|      | H | 1.74813300  | 2.10010800  | -0.22134100 |
|      | C | 1.17204800  | -1.18853200 | -0.24541200 |
|      | H | 1.09272900  | -1.14468700 | -1.35256900 |
|      | H | 1.70849300  | -2.11611300 | -0.05766200 |
|      | C | 2.03197600  | -0.01274400 | -0.16082900 |
|      | C | -2.41736400 | 0.04751800  | -0.13673300 |
|      | H | -2.82786400 | 1.03060700  | -0.34974800 |
|      | H | -2.68766100 | -0.62220900 | -0.95307800 |
|      | H | -2.90447200 | -0.33773000 | 0.75928500  |
| IM37 | C | 1.75416700  | -0.46014000 | -1.15796000 |
|      | H | 1.82041000  | 0.46663300  | -1.73304900 |
|      | H | 2.27217500  | -1.21705300 | -1.74741500 |
|      | C | 2.44113200  | -0.28160600 | 0.15726300  |

|      |   |             |             |             |
|------|---|-------------|-------------|-------------|
|      | C | 1.73318900  | -0.01229800 | 1.24679600  |
|      | H | 2.24563900  | 0.11276000  | 2.19217200  |
|      | C | 0.25304700  | 0.16726500  | 1.28429700  |
|      | H | 0.02055800  | 1.13674300  | 1.72421300  |
|      | H | -0.19459700 | -0.58780600 | 1.93153900  |
|      | C | 0.30352700  | -0.86689500 | -0.99103500 |
|      | H | 0.26468900  | -1.86761200 | -0.55889700 |
|      | H | -0.18873900 | -0.89565000 | -1.96007200 |
|      | C | -0.44580900 | 0.06441600  | -0.05606000 |
|      | C | -1.94283000 | -0.31478900 | 0.11391800  |
|      | C | -2.62764700 | 0.63923300  | 1.06981500  |
|      | H | -3.68161200 | 0.38485800  | 1.13494700  |
|      | H | -2.20305600 | 0.55967000  | 2.06550700  |
|      | H | -2.53308800 | 1.66489200  | 0.72423700  |
|      | C | -2.68299500 | -0.33566600 | -1.21128700 |
|      | H | -2.30039700 | -1.10670200 | -1.87750800 |
|      | H | -3.73231000 | -0.54819400 | -1.02507700 |
|      | H | -2.60523000 | 0.61984000  | -1.72171800 |
|      | O | -2.01119700 | -1.58643000 | 0.72483000  |
|      | H | -1.85500700 | -2.26236500 | 0.06798900  |
|      | C | 3.92762400  | -0.39361500 | 0.16423500  |
|      | H | 4.33794000  | -0.21802400 | 1.15469800  |
|      | H | 4.24930800  | -1.38022400 | -0.16977000 |
|      | H | 4.37168700  | 0.33069200  | -0.51910700 |
|      | O | -0.50368000 | 1.35698800  | -0.73298100 |
|      | O | 0.44377800  | 2.17595500  | -0.41717100 |
| IM38 | C | 1.80238900  | -1.03998800 | -1.06057000 |
|      | H | 1.90054200  | -0.23872100 | -1.79543600 |
|      | H | 2.32793000  | -1.89666700 | -1.48438600 |
|      | C | 2.46234900  | -0.63117800 | 0.21713700  |
|      | C | 1.73428400  | -0.22014600 | 1.24877400  |
|      | H | 2.23406400  | 0.06410200  | 2.16621400  |
|      | C | 0.24591200  | -0.09818400 | 1.25593900  |
|      | H | -0.04742400 | 0.88918700  | 1.61257200  |
|      | H | -0.17479100 | -0.80937900 | 1.96874800  |
|      | C | 0.34373300  | -1.40496500 | -0.86201200 |
|      | H | 0.29981600  | -2.33652400 | -0.29707000 |
|      | H | -0.13172500 | -1.56932700 | -1.82599300 |
|      | C | -0.43031600 | -0.36230100 | -0.07741800 |
|      | C | -1.92143500 | -0.76515800 | 0.13681500  |
|      | C | -2.63162800 | 0.24133800  | 1.01711100  |
|      | H | -3.67992700 | -0.03254300 | 1.09589500  |
|      | H | -2.21235300 | 0.23884400  | 2.01862800  |
|      | H | -2.54955700 | 1.24061700  | 0.60127200  |
|      | C | -2.66420600 | -0.91339300 | -1.17867100 |
|      | H | -2.23916600 | -1.69891200 | -1.80096200 |

|      |   |             |             |             |
|------|---|-------------|-------------|-------------|
|      | H | -3.69845200 | -1.17394400 | -0.96973400 |
|      | H | -2.64434500 | 0.01239100  | -1.74566400 |
|      | O | -1.94950100 | -1.98571900 | 0.84744500  |
|      | H | -1.80330900 | -2.70926100 | 0.24099500  |
|      | C | 3.95162700  | -0.69076400 | 0.25377200  |
|      | H | 4.34412100  | -0.34288800 | 1.20514800  |
|      | H | 4.30760300  | -1.70756400 | 0.08784100  |
|      | H | 4.38128400  | -0.07404600 | -0.53603100 |
|      | O | -0.56587800 | 0.83444800  | -0.87462300 |
|      | O | 0.59146300  | 1.61545800  | -0.81885000 |
|      | N | 0.39540600  | 2.81984700  | -0.19952800 |
|      | O | -0.66838400 | 3.00007800  | 0.23970200  |
| IM39 | C | 1.77485800  | -1.23587700 | -0.03735700 |
|      | H | 1.80058600  | -1.56819100 | -1.07662000 |
|      | H | 2.32305500  | -1.98191400 | 0.53901000  |
|      | C | 2.46355100  | 0.08609300  | 0.07323900  |
|      | C | 1.75865100  | 1.20724200  | 0.16636500  |
|      | H | 2.27945400  | 2.15276200  | 0.25199900  |
|      | C | 0.27161300  | 1.28950400  | 0.12802900  |
|      | H | -0.03510600 | 2.05579200  | -0.58159800 |
|      | H | -0.14306300 | 1.56992800  | 1.09885900  |
|      | C | 0.34211700  | -1.17318700 | 0.44597900  |
|      | H | 0.32876400  | -0.98814200 | 1.51997100  |
|      | H | -0.15099000 | -2.12593000 | 0.26318600  |
|      | C | -0.42164000 | -0.04229300 | -0.24749900 |
|      | C | -1.92820100 | 0.01337000  | 0.13976500  |
|      | C | -2.58120200 | 1.26597100  | -0.39972300 |
|      | H | -3.65471600 | 1.21477600  | -0.24029000 |
|      | H | -2.21069600 | 2.14582300  | 0.11743300  |
|      | H | -2.38496600 | 1.36573100  | -1.46354300 |
|      | C | -2.64794700 | -1.21099900 | -0.39424800 |
|      | H | -2.26693400 | -2.13201100 | 0.04343300  |
|      | H | -3.70739300 | -1.14278200 | -0.16142300 |
|      | H | -2.52986700 | -1.27641500 | -1.47336800 |
|      | O | -2.04949400 | 0.08525800  | 1.54606700  |
|      | H | -1.89963500 | -0.78077900 | 1.92052100  |
|      | C | 3.95433100  | 0.07156400  | 0.04954000  |
|      | H | 4.36748300  | 1.07490600  | 0.10226500  |
|      | H | 4.35358100  | -0.50790400 | 0.88191500  |
|      | H | 4.31964300  | -0.39784800 | -0.86415800 |
|      | O | -0.28875500 | -0.12352600 | -1.59883400 |
| P1   | C | 0.46454300  | 1.75197400  | -1.17871300 |
|      | H | 0.10839100  | 2.78023700  | -1.19991000 |
|      | H | 1.12712900  | 1.62033000  | -2.03106100 |
|      | C | 1.27292800  | 1.61265900  | 0.10869700  |
|      | C | 1.16832400  | 0.18349900  | 0.63317500  |

|    |   |             |             |             |
|----|---|-------------|-------------|-------------|
|    | H | 1.81256200  | 0.05005700  | 1.49872500  |
|    | C | -0.26192100 | -0.21125100 | 0.95152900  |
|    | H | -0.44101000 | -0.00159000 | 2.00233200  |
|    | H | -0.35540800 | -1.28927700 | 0.82465400  |
|    | C | -0.70398300 | 0.77769300  | -1.28065200 |
|    | H | -0.35338500 | -0.15743200 | -1.71982800 |
|    | H | -1.44317000 | 1.19369600  | -1.96060200 |
|    | C | -1.30703200 | 0.48994000  | 0.08464800  |
|    | H | -1.55511400 | 1.44608000  | 0.54702300  |
|    | C | -2.60416100 | -0.33550300 | 0.02192500  |
|    | C | -3.10967200 | -0.64497100 | 1.41657000  |
|    | H | -4.05536600 | -1.17662400 | 1.35523600  |
|    | H | -2.40793800 | -1.27804800 | 1.95103500  |
|    | H | -3.25928800 | 0.27088700  | 1.98426300  |
|    | C | -3.68889600 | 0.38811900  | -0.75706800 |
|    | H | -3.42266600 | 0.51510100  | -1.80436600 |
|    | H | -4.61026300 | -0.18716300 | -0.71833100 |
|    | H | -3.87927700 | 1.37427900  | -0.33856100 |
|    | O | -2.35636400 | -1.60115100 | -0.56596000 |
|    | H | -2.17895400 | -1.48735800 | -1.49813300 |
|    | C | 2.70854600  | 2.04245600  | -0.09022700 |
|    | H | 3.25761700  | 2.01253600  | 0.85144000  |
|    | H | 3.21435000  | 1.38940400  | -0.79554900 |
|    | H | 2.73683200  | 3.05965200  | -0.47267100 |
|    | O | 0.64406800  | 2.43467200  | 1.07522500  |
|    | O | 2.04251300  | -2.18337300 | 1.06162100  |
|    | O | 1.71286800  | -0.61686500 | -0.43667400 |
|    | H | 1.22911200  | 2.54725700  | 1.82297800  |
|    | N | 2.10198700  | -1.87237400 | -0.09394400 |
|    | O | 2.47315100  | -2.52116900 | -1.02176000 |
| P2 | C | 1.67209000  | 0.05342000  | -0.17626800 |
|    | H | 1.75861100  | 0.89091500  | 0.51773400  |
|    | H | 1.72996100  | 0.50815500  | -1.16875400 |
|    | C | 2.88669600  | -0.81620600 | 0.01190900  |
|    | C | -0.25259000 | 2.55501300  | -0.23551600 |
|    | H | -0.72386400 | 2.76990500  | -1.21232300 |
|    | C | -0.85952200 | 1.42051700  | 0.51895100  |
|    | H | -1.88224500 | 1.70982600  | 0.76136700  |
|    | H | -0.33794000 | 1.29784400  | 1.46518900  |
|    | C | 0.37715500  | -0.70688600 | 0.00442600  |
|    | H | 0.34077800  | -1.08779300 | 1.02751100  |
|    | H | 0.41142900  | -1.58380800 | -0.63650800 |
|    | C | -0.87022200 | 0.11767600  | -0.29039400 |
|    | H | -0.85884300 | 0.36515500  | -1.35760100 |
|    | C | -2.18171000 | -0.66059500 | -0.04175900 |
|    | C | -3.35391300 | 0.04901600  | -0.68819200 |

|    |   |             |             |             |
|----|---|-------------|-------------|-------------|
|    | H | -4.27401200 | -0.47136400 | -0.43788100 |
|    | H | -3.45092500 | 1.07317400  | -0.33942500 |
|    | H | -3.24299900 | 0.06081200  | -1.76980600 |
|    | C | -2.11327300 | -2.08318800 | -0.56785900 |
|    | H | -1.39668200 | -2.68349200 | -0.01153800 |
|    | H | -3.08886400 | -2.55218600 | -0.47132100 |
|    | H | -1.82300000 | -2.10370200 | -1.61661900 |
|    | O | -2.47353000 | -0.67832900 | 1.34344700  |
|    | H | -1.85249700 | -1.25137900 | 1.79032600  |
|    | C | 4.21915800  | -0.17639800 | -0.23877800 |
|    | H | 5.01386900  | -0.84685600 | 0.06615000  |
|    | H | 4.32256600  | 0.04390000  | -1.30022700 |
|    | H | 4.30061600  | 0.76983200  | 0.29114700  |
|    | O | 2.78882000  | -1.97130600 | 0.34497000  |
|    | O | 0.67356400  | 3.22174200  | 0.13951600  |
| P3 | C | 1.22164500  | 0.43227200  | -0.56532000 |
|    | H | 1.09021500  | 1.51080200  | -0.66370600 |
|    | H | 1.27001300  | 0.02741300  | -1.57491000 |
|    | C | 2.55628400  | 0.17921600  | 0.11391400  |
|    | C | 2.85484600  | -1.30005000 | 0.21861000  |
|    | H | 3.46413700  | -1.57951200 | 1.09308500  |
|    | C | -1.47807800 | 1.71466800  | 0.11639200  |
|    | H | -1.84710100 | 1.79430000  | 1.15216800  |
|    | C | 0.04206500  | -0.17701300 | 0.16911200  |
|    | H | 0.11512300  | 0.06662000  | 1.23067300  |
|    | H | 0.10186900  | -1.26083500 | 0.08496500  |
|    | C | -1.30038000 | 0.31210300  | -0.38280300 |
|    | H | -1.25411900 | 0.34761700  | -1.47139400 |
|    | C | -2.49391100 | -0.56299000 | 0.04180600  |
|    | C | -3.79393700 | 0.11233000  | -0.34332900 |
|    | H | -4.63430200 | -0.51812100 | -0.06666000 |
|    | H | -3.90623600 | 1.06231300  | 0.17411600  |
|    | H | -3.82893500 | 0.29699900  | -1.41415000 |
|    | C | -2.42514200 | -1.94047200 | -0.58905700 |
|    | H | -1.53320100 | -2.48655800 | -0.28930400 |
|    | H | -3.29184700 | -2.52024600 | -0.28195800 |
|    | H | -2.42302100 | -1.87114900 | -1.67427900 |
|    | O | -2.52963600 | -0.66885500 | 1.45318800  |
|    | H | -1.82047100 | -1.23977000 | 1.74483800  |
|    | C | 3.69958500  | 0.80741600  | -0.66855500 |
|    | H | 4.65209700  | 0.61481000  | -0.18074900 |
|    | H | 3.73531500  | 0.41674700  | -1.68165000 |
|    | H | 3.55427800  | 1.88551400  | -0.72497300 |
|    | O | 2.56321300  | 0.62856800  | 1.44991300  |
|    | O | 2.49691400  | -2.10991600 | -0.58931900 |
|    | H | 2.57179800  | 1.58406100  | 1.46358000  |



|    |             |             |             |             |
|----|-------------|-------------|-------------|-------------|
|    | O           | -1.19467500 | 2.70071800  | -0.51182000 |
| P4 | C           | -1.28055900 | -1.46564000 | -0.49797000 |
|    | H           | -1.30314000 | -2.30338800 | 0.19706100  |
|    | H           | -1.81140300 | -1.77294100 | -1.39617400 |
|    | C           | -2.05470700 | -0.33873400 | 0.18432300  |
|    | C           | -1.43223200 | 0.99557000  | -0.20514700 |
|    | C           | 0.02575300  | 1.14455000  | 0.12993900  |
|    | H           | 0.08454100  | 1.68945200  | 1.07163200  |
|    | H           | 0.46902400  | 1.77698700  | -0.63806600 |
|    | C           | 0.15919300  | -1.10034700 | -0.84496900 |
|    | H           | 0.17754000  | -0.57747900 | -1.80495600 |
|    | H           | 0.73017600  | -2.01704600 | -0.97379000 |
|    | C           | 0.76987500  | -0.18586400 | 0.20793600  |
|    | H           | 0.60312800  | -0.63258200 | 1.18808500  |
|    | C           | 2.28657400  | 0.01214200  | 0.04757500  |
|    | C           | 2.79792700  | 1.05879400  | 1.01562800  |
|    | H           | 3.87961100  | 1.13120900  | 0.94209400  |
|    | H           | 2.38274700  | 2.03423600  | 0.78109100  |
|    | H           | 2.53316500  | 0.80060600  | 2.03874400  |
|    | C           | 3.03823400  | -1.28928500 | 0.26866400  |
|    | H           | 2.76712600  | -2.04700600 | -0.46398000 |
|    | H           | 4.10728500  | -1.11254500 | 0.18334200  |
|    | H           | 2.83239700  | -1.69383500 | 1.25725600  |
|    | O           | 2.58358100  | 0.52640000  | -1.23933000 |
|    | H           | 2.44082200  | -0.15710000 | -1.89158800 |
|    | C           | -3.52861800 | -0.38455400 | -0.12254000 |
| H  | -4.06043100 | 0.39903200  | 0.41313900  |             |
| H  | -3.70295100 | -0.22001800 | -1.18141100 |             |
| H  | -3.93263200 | -1.35235200 | 0.16356100  |             |
| O  | -1.81870100 | -0.49126400 | 1.57925300  |             |
| O  | -2.07498200 | 1.87489300  | -0.72030400 |             |
| H  | -2.40482300 | 0.09475500  | 2.05637400  |             |
| P5 | C           | 0.47397500  | -0.97529800 | 1.54581000  |
|    | H           | 0.25372800  | -2.04066400 | 1.51283600  |
|    | H           | 0.96288200  | -0.76680100 | 2.49601300  |
|    | C           | 1.45660800  | -0.70748200 | 0.42090600  |
|    | C           | 0.75700700  | -0.95719000 | -0.91974500 |
|    | H           | 1.42978400  | -0.70883600 | -1.73666700 |
|    | C           | -0.51773000 | -0.15413000 | -1.04713600 |
|    | H           | -0.95137900 | -0.39959300 | -2.01245300 |
|    | H           | -0.28481100 | 0.91069100  | -1.05628800 |
|    | C           | -0.81490200 | -0.18448600 | 1.41416500  |
|    | H           | -0.58894800 | 0.87885200  | 1.51610700  |
|    | H           | -1.46512700 | -0.45857800 | 2.24175600  |
|    | C           | -1.50007300 | -0.43840700 | 0.07904200  |
|    | H           | -1.77060900 | -1.49616000 | 0.03239900  |

|    |   |              |              |              |
|----|---|--------------|--------------|--------------|
|    | C | -2. 80174100 | 0. 37142600  | -0. 08386600 |
|    | C | -3. 46980000 | 0. 07687100  | -1. 41178600 |
|    | H | -4. 44242600 | 0. 56001500  | -1. 44699300 |
|    | H | -2. 88129300 | 0. 46639600  | -2. 23606400 |
|    | H | -3. 60538700 | -0. 99345000 | -1. 54968000 |
|    | C | -3. 77603200 | 0. 07795000  | 1. 04478000  |
|    | H | -3. 39796300 | 0. 42157400  | 2. 00557200  |
|    | H | -4. 71590600 | 0. 59086900  | 0. 85827600  |
|    | H | -3. 97424700 | -0. 98917000 | 1. 12482100  |
|    | O | -2. 51988700 | 1. 75994900  | -0. 11845700 |
|    | H | -2. 25559200 | 2. 05146600  | 0. 75216500  |
|    | C | 2. 71818700  | -1. 51957800 | 0. 60875000  |
|    | H | 3. 38297700  | -1. 46216700 | -0. 24621600 |
|    | H | 3. 25154200  | -1. 17634000 | 1. 49181800  |
|    | H | 2. 44298000  | -2. 55780100 | 0. 77297600  |
|    | O | 0. 41453100  | -2. 32741900 | -0. 97661800 |
|    | O | 1. 71703000  | 0. 71708500  | 0. 60764100  |
|    | O | 3. 11066200  | 0. 73914500  | -1. 09408900 |
|    | O | 2. 78583500  | 2. 48714700  | 0. 11484600  |
|    | N | 2. 60772000  | 1. 34954400  | -0. 19132700 |
|    | H | 1. 13738900  | -2. 82243500 | -1. 35319000 |
| P6 | C | -1. 85663300 | 0. 43446900  | 0. 27026700  |
|    | H | -1. 79315300 | 1. 40942400  | -0. 21780500 |
|    | H | -1. 78360400 | 0. 65091000  | 1. 33854600  |
|    | C | -3. 23125200 | -0. 12301000 | 0. 00840100  |
|    | C | 1. 70798900  | 2. 34002900  | -0. 38879000 |
|    | H | 2. 02292400  | 3. 07475000  | -1. 14911200 |
|    | C | 0. 95948200  | 1. 16019600  | -0. 91710200 |
|    | H | 1. 50455800  | 0. 74600100  | -1. 76824100 |
|    | H | 0. 04779800  | 1. 57593800  | -1. 35670700 |
|    | C | -0. 74548800 | -0. 49683900 | -0. 16105900 |
|    | H | -0. 86663700 | -0. 72419100 | -1. 22099900 |
|    | H | -0. 89091300 | -1. 43736100 | 0. 36384800  |
|    | C | 0. 64624800  | 0. 07047000  | 0. 09801100  |
|    | H | 0. 66802300  | 0. 52262500  | 1. 09171200  |
|    | C | 1. 73785200  | -1. 02029500 | 0. 08288100  |
|    | C | 3. 11981800  | -0. 41866900 | 0. 23302400  |
|    | H | 3. 85745500  | -1. 21414400 | 0. 29283300  |
|    | H | 3. 37554700  | 0. 19483700  | -0. 62677700 |
|    | H | 3. 17855700  | 0. 19660600  | 1. 12649800  |
|    | C | 1. 52611800  | -2. 04065700 | 1. 18877700  |
|    | H | 0. 59979200  | -2. 59712200 | 1. 06829800  |
|    | H | 2. 34329400  | -2. 75690500 | 1. 17915300  |
|    | H | 1. 50372200  | -1. 55708200 | 2. 16298000  |
|    | O | 1. 74898100  | -1. 66765000 | -1. 17844100 |
|    | H | 0. 95933700  | -2. 19973800 | -1. 26501600 |

|    |   |             |             |             |
|----|---|-------------|-------------|-------------|
|    | C | -4.39620200 | 0.75531200  | 0.35692800  |
|    | H | -4.41238600 | 1.62168800  | -0.30253700 |
|    | H | -5.32119000 | 0.20250300  | 0.24388700  |
|    | H | -4.30768000 | 1.13092200  | 1.37398600  |
|    | O | -3.38560600 | -1.22203300 | -0.46269400 |
|    | O | 1.94999600  | 2.53897000  | 0.77081300  |
| P7 | C | 0.03310600  | 0.43755000  | -0.00005200 |
|    | H | -0.03281800 | 1.51425000  | 0.00022100  |
|    | C | 1.19146100  | -0.20475500 | -0.00003000 |
|    | H | 2.11192500  | 0.35222500  | 0.00021700  |
|    | H | 1.25378300  | -1.28312200 | -0.00007800 |
|    | O | -1.19435300 | -0.11404400 | -0.00003600 |
|    | H | -1.12547100 | -1.06777000 | 0.00041600  |
| P8 | C | -1.12981700 | -0.59844500 | 0.06425300  |
|    | H | -0.85791100 | -0.74382400 | 1.11216000  |
|    | H | -1.24209900 | -1.60489400 | -0.34255400 |
|    | C | -2.46755900 | 0.09040000  | 0.03381800  |
|    | C | -0.04274400 | 0.16879300  | -0.66473500 |
|    | H | -0.03587200 | 1.18794600  | -0.27846800 |
|    | H | -0.33486400 | 0.27726000  | -1.70948200 |
|    | C | 1.28841300  | -0.49553100 | -0.56545400 |
|    | H | 1.38325200  | -1.47442600 | -1.01224100 |
|    | C | 2.37554100  | -0.00318300 | 0.02647000  |
|    | C | 3.68186600  | -0.70215600 | 0.11314800  |
|    | H | 4.45731400  | -0.10879500 | -0.36680200 |
|    | H | 3.96992600  | -0.83054700 | 1.15451200  |
|    | H | 3.63511900  | -1.67485200 | -0.36343200 |
|    | O | 2.44194200  | 1.20669100  | 0.63186300  |
|    | H | 1.60741000  | 1.66475600  | 0.54727800  |
|    | C | -3.64381800 | -0.69174000 | 0.53815400  |
|    | H | -3.41026600 | -1.19059700 | 1.47595600  |
|    | H | -4.49818700 | -0.03703200 | 0.66347300  |
|    | H | -3.89315900 | -1.46816700 | -0.18387000 |
|    | O | -2.58593700 | 1.21760200  | -0.37817000 |
| P9 | C | 0.18356100  | -0.52857500 | 0.09972800  |
|    | H | 0.13368300  | -1.34629800 | -0.61907100 |
|    | H | 0.12879600  | -1.00156400 | 1.08456600  |
|    | C | 1.54079600  | 0.12559800  | 0.01422400  |
|    | C | -0.95357400 | 0.45402100  | -0.09194200 |
|    | H | -1.03350100 | 0.77933000  | -1.12468200 |
|    | H | -0.74804800 | 1.33589400  | 0.51753300  |
|    | C | -2.25622200 | -0.12666900 | 0.34574000  |
|    | H | -2.27510400 | -0.51158700 | 1.38225100  |
|    | C | 2.71878200  | -0.79129600 | -0.11196900 |
|    | H | 2.73800800  | -1.20925700 | -1.11760100 |
|    | H | 3.63636900  | -0.24168600 | 0.06054300  |

|     |   |             |             |             |
|-----|---|-------------|-------------|-------------|
|     | H | 2.64271100  | -1.62679500 | 0.58016500  |
|     | O | 1.66287000  | 1.32284400  | 0.04869600  |
|     | O | -3.24074100 | -0.19490700 | -0.33599500 |
| P10 | C | -0.00000400 | 0.18021900  | -0.00005200 |
|     | O | -0.00001200 | 1.38509400  | 0.00001000  |
|     | C | -1.27796300 | -0.60697000 | -0.00166100 |
|     | H | -2.12486700 | 0.06217700  | -0.09566600 |
|     | H | -1.36279900 | -1.17166400 | 0.92544300  |
|     | C | 1.27797600  | -0.60695900 | 0.00164700  |
|     | H | 1.28265400  | -1.32894600 | 0.81576900  |
|     | H | 1.36244200  | -1.17256200 | -0.92492500 |
|     | H | 2.12489400  | 0.06231100  | 0.09471500  |
|     | H | -1.28228800 | -1.32980900 | -0.81502500 |
| P11 | C | -0.92488900 | 2.36132600  | -0.60965900 |
|     | H | -0.87130200 | 3.15338900  | -1.37451100 |
|     | C | 2.35498100  | 0.48361200  | 0.25709500  |
|     | C | 0.50840700  | -1.09920900 | -0.35265600 |
|     | H | 0.67578600  | -1.73139200 | 0.51782800  |
|     | H | 0.17118900  | -1.75339800 | -1.15915300 |
|     | C | -0.74916500 | 0.96965900  | -1.12860800 |
|     | H | 0.10503100  | 1.01065800  | -1.80072300 |
|     | H | -1.60107700 | 0.73780600  | -1.77300300 |
|     | C | -0.59057600 | -0.08750000 | -0.04039900 |
|     | H | -0.33531000 | 0.43840500  | 0.88045700  |
|     | C | 3.26479200  | 0.03121900  | 1.34886600  |
|     | H | 4.20688100  | -0.29805800 | 0.91654800  |
|     | H | 3.42668800  | 0.84293100  | 2.04755100  |
|     | H | 2.84567500  | -0.83693100 | 1.85374200  |
|     | O | 1.96571600  | 1.62065600  | 0.15113300  |
|     | C | 1.88008200  | -0.55075900 | -0.74006500 |
|     | H | 1.83928700  | -0.04738400 | -1.70602600 |
|     | O | 2.82645100  | -1.59004000 | -0.77521400 |
|     | C | -1.92244200 | -0.80555000 | 0.23268600  |
|     | C | -1.79075400 | -1.84343600 | 1.33594700  |
|     | H | -1.16570500 | -2.67433800 | 1.02424300  |
|     | H | -1.37216600 | -1.40475800 | 2.23973900  |
|     | H | -2.77102900 | -2.24494500 | 1.58873800  |
|     | C | -3.01243600 | 0.18235200  | 0.60619500  |
|     | H | -3.21996600 | 0.87054400  | -0.20813900 |
|     | H | -3.93415100 | -0.35298400 | 0.83342500  |
|     | H | -2.72786300 | 0.76782700  | 1.47575200  |
|     | O | -2.26060500 | -1.45189000 | -0.98719100 |
|     | H | -3.12644000 | -1.84602500 | -0.90114400 |
|     | O | -1.12540400 | 2.64802100  | 0.53831900  |
|     | H | 2.49721400  | -2.29561900 | -1.32811600 |
| P12 | C | 1.58098900  | -1.34305500 | -0.65267700 |

|     |   |             |             |             |
|-----|---|-------------|-------------|-------------|
|     | H | 1.68062600  | -0.99840200 | -1.68272900 |
|     | H | 2.03689200  | -2.32449500 | -0.56584400 |
|     | C | 2.32115200  | -0.38002200 | 0.22038700  |
|     | C | 1.73014400  | 1.01441100  | 0.23482900  |
|     | H | 2.28764100  | 1.61745800  | 0.95077100  |
|     | C | 0.26395900  | 0.95761300  | 0.60417900  |
|     | H | -0.11734000 | 1.97402900  | 0.55371000  |
|     | H | 0.15956100  | 0.61850800  | 1.63542500  |
|     | C | 0.10129200  | -1.36098900 | -0.27790600 |
|     | H | 0.00193500  | -1.77696100 | 0.72789800  |
|     | H | -0.41238100 | -2.03722400 | -0.95662300 |
|     | C | -0.52407100 | 0.02832700  | -0.31004000 |
|     | H | -0.44917500 | 0.41332800  | -1.32962500 |
|     | C | -2.02113400 | 0.00537400  | 0.05963900  |
|     | C | -2.60895100 | 1.40224200  | 0.06153700  |
|     | H | -3.68781100 | 1.34563800  | 0.17748500  |
|     | H | -2.22015100 | 1.98278000  | 0.89167100  |
|     | H | -2.38349100 | 1.92096300  | -0.86759100 |
|     | C | -2.81270500 | -0.86806800 | -0.89933900 |
|     | H | -2.51418500 | -1.91294900 | -0.84155200 |
|     | H | -3.87018800 | -0.81225200 | -0.65472300 |
|     | H | -2.67890700 | -0.53940100 | -1.92788700 |
|     | O | -2.19198300 | -0.46641700 | 1.38594600  |
|     | H | -2.07182900 | -1.41393800 | 1.40283700  |
|     | O | 3.29681300  | -0.66713500 | 0.86745200  |
|     | O | 1.81207500  | 1.56082100  | -1.06594900 |
|     | H | 2.71951400  | 1.78977500  | -1.25647000 |
| P13 | C | 1.90824600  | -0.84674900 | -1.12209200 |
|     | H | 1.94882500  | 0.00615200  | -1.80060000 |
|     | H | 2.48721300  | -1.63952000 | -1.59775200 |
|     | C | 2.55509200  | -0.47269600 | 0.17314300  |
|     | C | 1.83649300  | -0.32645600 | 1.28126700  |
|     | H | 2.33685200  | -0.06273400 | 2.20355100  |
|     | C | 0.35135400  | -0.47945200 | 1.35136800  |
|     | H | -0.07250600 | 0.24925000  | 2.03294300  |
|     | H | 0.08416900  | -1.45873700 | 1.75657000  |
|     | C | 0.47711800  | -1.31974000 | -0.94714800 |
|     | H | 0.47349800  | -2.31240800 | -0.50516600 |
|     | H | -0.01473200 | -1.37843000 | -1.91858100 |
|     | C | -0.31153500 | -0.41120400 | -0.00729300 |
|     | C | -1.82989600 | -0.78636000 | 0.00424800  |
|     | C | -2.56498300 | -0.44240200 | 1.28320400  |
|     | H | -3.58698700 | -0.79738100 | 1.18347500  |
|     | H | -2.12080800 | -0.95706600 | 2.12963600  |
|     | H | -2.57434300 | 0.62142700  | 1.47833600  |
|     | C | -2.54091400 | -0.18005500 | -1.19064000 |

|     |   |             |             |             |
|-----|---|-------------|-------------|-------------|
|     | H | -2.01460700 | -0.38213700 | -2.12232300 |
|     | H | -3.53872600 | -0.60596300 | -1.25186200 |
|     | H | -2.63800200 | 0.89763900  | -1.09141800 |
|     | O | -1.91383500 | -2.20021600 | -0.04899100 |
|     | H | -1.73374400 | -2.49781900 | -0.93911800 |
|     | C | 4.03094700  | -0.26180500 | 0.13979700  |
|     | H | 4.41461100  | 0.03875100  | 1.11044400  |
|     | H | 4.54871100  | -1.17042500 | -0.16676100 |
|     | H | 4.29363200  | 0.51053800  | -0.58304100 |
|     | O | -0.07709300 | 0.86086100  | -0.69431000 |
|     | O | 0.02134000  | 2.97730400  | -0.77909500 |
|     | N | -0.35477300 | 2.05228200  | -0.12678900 |
|     | O | -0.94055900 | 2.07885200  | 0.91915400  |
| P14 | C | 0.59868600  | -1.23862300 | -0.14679200 |
|     | H | 0.52686900  | -1.53117500 | -1.19681800 |
|     | H | 1.18785400  | -2.01764300 | 0.33640200  |
|     | C | 1.31741200  | 0.07321800  | -0.04462900 |
|     | C | 0.65160500  | 1.21299700  | 0.11518600  |
|     | H | 1.20569700  | 2.13990100  | 0.18610900  |
|     | C | -0.83730600 | 1.32564700  | 0.16153600  |
|     | H | -1.21201100 | 2.00329200  | -0.60379400 |
|     | H | -1.15918800 | 1.75096900  | 1.11650600  |
|     | C | -0.78682000 | -1.18842700 | 0.47918300  |
|     | H | -0.67570400 | -1.09003500 | 1.56113300  |
|     | H | -1.36744700 | -2.08200400 | 0.27328700  |
|     | C | -1.54871700 | 0.01020500  | 0.00341900  |
|     | C | 2.80438800  | 0.02419400  | -0.15018200 |
|     | H | 3.24313600  | 1.01701400  | -0.11326500 |
|     | H | 3.23332700  | -0.57053800 | 0.65607600  |
|     | H | 3.10951700  | -0.44692300 | -1.08466800 |
|     | O | -2.66094100 | -0.06101500 | -0.45466200 |
